# Supplementary material
Source: PubMed Central journal article supplement (PMC6512873)

**Title:** Target-dependent nickase activities of CRISPR-Cas nucleases Cpf1 and Cas9

## Supplemental material

Supplementary Table 1) Retention scores for individual target sequence candidates from *unc-22A* mixed target library incubated with Cas9.

Libraries and incubations were as described in methods. Individual tags with >50 counts from sequencing each of two control reactions (control = no incubation with Cas9) were chosen for further analysis. For each target sequence, time point, and condition, the total numbers of sequence reads were normalized to the count of tags for an unrelated target sequence (Protospacer 4<sup>29</sup>) included in the library (for sequencing depth), and to the median representation of the sequence in the unreacted libraries (for tag representation). Shown are the log<sub>2</sub> retention scores calculated as described in methods for each tag meeting the minimum count criteria of 50 in each control. Positive retention scores are indicative of effective nicking in the reaction and tags are sorted with the criterion being the minimal retention scores for time points (from 1 to 360 minutes). Thus, the top of the list are sequences that are strongest candidates for effective nicking with positive retention at the 1-minute incubation and for which there is not substantial loss of target (cutting of the second strand) for the longest (360-minute reaction).

Target sequence design (*unc-22A*): 'NNNNNN'+ 'GCACCACCGTCGCCGGCATT'+ 'NGG'+ 'NNNNNN'

Reference Sequence design (PS4): 'NNNNNN'+ 'AAAATTAGGTGCGCTTGGC'+ 'NGG'+ 'NNNNNN'

with N's being equimolar mixture of all four nucleotides and other bases being a mixture of 90% of the indicated base and 3.33% of each other base.

Supplementary Table 2) Table of data for each corresponding Figures.

Each file is named as follows: (miscellaneous number and letter)-(exp [+ CRISPR protein] or con [no CRISPR protein])-(target [gfp1/gfp2/rol6/unc22])-(addition of library DNA in nanograms)-(type of CRISPR protein)-.....fastq.gz

| Figure | Files                                                                                                                                                                                                                                                                                                                                                                                                                                                                                                                                                                                                                                                                                                                                                                                                                                                                                                                                                                                                                                                                                                                                                                                                                                   |
|--------|-----------------------------------------------------------------------------------------------------------------------------------------------------------------------------------------------------------------------------------------------------------------------------------------------------------------------------------------------------------------------------------------------------------------------------------------------------------------------------------------------------------------------------------------------------------------------------------------------------------------------------------------------------------------------------------------------------------------------------------------------------------------------------------------------------------------------------------------------------------------------------------------------------------------------------------------------------------------------------------------------------------------------------------------------------------------------------------------------------------------------------------------------------------------------------------------------------------------------------------------|
| 2      | <p>Circular library:</p> <p>1a-exp-gfp1-1-50ng-lb_S1_L001_R1_001_AF-SOL-805.fastq.gz<br/>           1b-exp-gfp1-3-50ng-lb_S2_L001_R1_001_AF-SOL-805.fastq.gz<br/>           1c-exp-gfp1-10-50ng-lb_S3_L001_R1_001_AF-SOL-805.fastq.gz<br/>           1d-exp-gfp1-30-50ng-lb_S4_L001_R1_001_AF-SOL-805.fastq.gz<br/>           1e-exp-gfp1-60-50ng-lb_S5_L001_R1_001_AF-SOL-805.fastq.gz<br/>           1f-exp-gfp1-180-50ng-lb_S6_L001_R1_001_AF-SOL-805.fastq.gz<br/>           1h-con-50ng_S7_L001_R1_001_AF-SOL-805.fastq.gz<br/>           2h-con-50ng_S14_L001_R1_001_AF-SOL-805.fastq.gz</p> <p>Linear library:</p> <p>2a-exp-gfp1-1-50ng-lb_S7_L001_R1_001_AF_SOL_820.fastq.gz<br/>           2b-exp-gfp1-3-50ng-lb_S8_L001_R1_001_AF_SOL_820.fastq.gz<br/>           2c-exp-gfp1-10-50ng-lb_S9_L001_R1_001_AF_SOL_820.fastq.gz<br/>           2d-exp-gfp1-30-50ng-lb_S10_L001_R1_001_AF_SOL_820.fastq.gz<br/>           2e-exp-gfp1-60-50ng-lb_S11_L001_R1_001_AF_SOL_820.fastq.gz<br/>           2f-exp-gfp1-360-50ng-lb_S12_L001_R1_001_AF_SOL_820.fastq.gz<br/>           3g-con_S19_L001_R1_001_AF_SOL_820.fastq.gz<br/>           3h-con_S20_L001_R1_001_AF_SOL_820.fastq.gz</p>                                           |
| 4      | <p>4a-c)</p> <p>Circular library:</p> <p>1a-con-unc22-cas9-RVL-yeast-circ-ku_S1_L001_R1_001_AF_SOL_875.fastq.gz<br/>           1b-exp-1-unc22-cas9-RVL-yeast-circ-ku_S2_L001_R1_001_AF_SOL_875.fastq.gz<br/>           1c-exp-1-unc22-cas9-RVL-yeast-circ-ku_S3_L001_R1_001_AF_SOL_875.fastq.gz<br/>           1d-exp-2.5-unc22-cas9-RVL-yeast-circ-ku_S4_L001_R1_001_AF_SOL_875.fastq.gz<br/>           1e-exp-2.5-unc22-cas9-RVL-yeast-circ-ku_S5_L001_R1_001_AF_SOL_875.fastq.gz<br/>           2a-con-unc22-cas9-RVL-yeast-circ-by_S6_L001_R1_001_AF_SOL_875.fastq.gz<br/>           2b-exp-1-unc22-cas9-RVL-yeast-circ-by_S7_L001_R1_001_AF_SOL_875.fastq.gz<br/>           2c-exp-1-unc22-cas9-RVL-yeast-circ-by_S8_L001_R1_001_AF_SOL_875.fastq.gz<br/>           2d-exp-2.5-unc22-cas9-RVL-yeast-circ-by_S9_L001_R1_001_AF_SOL_875.fastq.gz<br/>           2e-exp-2.5-unc22-cas9-RVL-yeast-circ-by_S10_L001_R1_001_AF_SOL_875.fastq.gz</p> <p>Linear library:</p> <p>3a-con-unc22-cas9-RVL-yeast-lin-ku_S11_L001_R1_001_AF_SOL_875.fastq.gz<br/>           3b-exp-1-unc22-cas9-RVL-yeast-lin-ku_S12_L001_R1_001_AF_SOL_875.fastq.gz<br/>           3c-exp-1-unc22-cas9-RVL-yeast-lin-ku_S13_L001_R1_001_AF_SOL_875.fastq.gz</p> |

|      |                                                                                                                                                                                                                                                                                                                                                                                                                                                                                                                                                                                                                                                                                                                                                                                                                                                                                                                                                                                                                                                                                                                                                                                                                                                                                                                                                                                                                                                                                                                                                                                                                                                                                                                                                                                                                                                                                                                                                                                                                                                                                                                                                                                                                   |
|------|-------------------------------------------------------------------------------------------------------------------------------------------------------------------------------------------------------------------------------------------------------------------------------------------------------------------------------------------------------------------------------------------------------------------------------------------------------------------------------------------------------------------------------------------------------------------------------------------------------------------------------------------------------------------------------------------------------------------------------------------------------------------------------------------------------------------------------------------------------------------------------------------------------------------------------------------------------------------------------------------------------------------------------------------------------------------------------------------------------------------------------------------------------------------------------------------------------------------------------------------------------------------------------------------------------------------------------------------------------------------------------------------------------------------------------------------------------------------------------------------------------------------------------------------------------------------------------------------------------------------------------------------------------------------------------------------------------------------------------------------------------------------------------------------------------------------------------------------------------------------------------------------------------------------------------------------------------------------------------------------------------------------------------------------------------------------------------------------------------------------------------------------------------------------------------------------------------------------|
|      | <p>3d-exp-2.5-unc22-cas9-RVL-yeast-lin-ku_S14_L001_R1_001_AF_SOL_875.fastq.gz<br/> 3e-exp-2.5-unc22-cas9-RVL-yeast-lin-ku_S15_L001_R1_001_AF_SOL_875.fastq.gz<br/> 4a-con-unc22-cas9-RVL-yeast-lin-by_S16_L001_R1_001_AF_SOL_875.fastq.gz<br/> 4b-exp-1-unc22-cas9-RVL-yeast-lin-by_S17_L001_R1_001_AF_SOL_875.fastq.gz<br/> 4c-exp-1-unc22-cas9-RVL-yeast-lin-by_S18_L001_R1_001_AF_SOL_875.fastq.gz<br/> 4d-exp-2.5-unc22-cas9-RVL-yeast-lin-by_S19_L001_R1_001_AF_SOL_875.fastq.gz<br/> 4e-exp-2.5-unc22-cas9-RVL-yeast-lin-by_S20_L001_R1_001_AF_SOL_875.fastq.gz</p> <p>4d)<br/> Circular library:<br/> 1a-exp-unc22-1-50ng-cas9-circ-cas9buff-RVL2_S21_L001_R1_001_AF_SOL_878.fastq.gz<br/> 1b-exp-unc22-3-50ng-cas9-circ-cas9buff-RVL2_S22_L001_R1_001_AF_SOL_878.fastq.gz<br/> 1c-exp-unc22-10-50ng-cas9-circ-cas9buff-RVL2_S23_L001_R1_001_AF_SOL_878.fastq.gz<br/> 2a-con-circ-cas9_S27_L001_R1_001_AF_SOL_878.fastq.gz<br/> 2b-con-circ-cas9_S28_L001_R1_001_AF_SOL_878.fastq.gz</p> <p>Linear library:<br/> 1a-exp-unc22-1-50ng-cas9-lin-cas9buff-RVL2_S7_L001_R1_001_AF_SOL_878.fastq.gz<br/> 1b-exp-unc22-3-50ng-cas9-lin-cas9buff-RVL2_S8_L001_R1_001_AF_SOL_878.fastq.gz<br/> 1c-exp-unc22-10-50ng-cas9-lin-cas9buff-RVL2_S9_L001_R1_001_AF_SOL_878.fastq.gz<br/> 2a-con-lin-cas9_S13_L001_R1_001_AF_SOL_878.fastq.gz<br/> 2b-con-lin-cas9_S14_L001_R1_001_AF_SOL_878.fastq.gz</p> <p>4e)<br/> Circular library:<br/> 1a-exp-unc22-1-50ng-cas9-circ-thermo-RVL2_S15_L001_R1_001_AF_SOL_878.fastq.gz<br/> 1b-exp-unc22-3-50ng-cas9-circ--thermo-RVL2_S16_L001_R1_001_AF_SOL_878.fastq.gz<br/> 1c-exp-unc22-10-50ng-cas9-circ--thermo-RVL2_S17_L001_R1_001_AF_SOL_878.fastq.gz<br/> 2a-con-circ-cas9_S27_L001_R1_001_AF_SOL_878.fastq.gz<br/> 2b-con-circ-cas9_S28_L001_R1_001_AF_SOL_878.fastq.gz</p> <p>Linear library:<br/> 1a-exp-unc22-1-50ng-cas9-lin-thermo-RVL2_S1_L001_R1_001_AF_SOL_878.fastq.gz<br/> 1b-exp-unc22-3-50ng-cas9-lin-thermo-RVL2_S2_L001_R1_001_AF_SOL_878.fastq.gz<br/> 1c-exp-unc22-10-50ng-cas9-lin-thermo-RVL2_S3_L001_R1_001_AF_SOL_878.fastq.gz<br/> 2a-con-lin-cas9_S13_L001_R1_001_AF_SOL_878.fastq.gz<br/> 2b-con-lin-cas9_S14_L001_R1_001_AF_SOL_878.fastq.gz</p> |
| S1-3 | <p>Circular library:<br/> 2h-con-50ng_S14_L001_R1_001_AF-SOL-805.fastq.gz<br/> 2f-exp-gfp2-180-50ng-lb_S13_L001_R1_001_AF-SOL-805.fastq.gz<br/> 2e-exp-gfp2-60-50ng-lb_S12_L001_R1_001_AF-SOL-805.fastq.gz<br/> 2d-exp-gfp2-30-50ng-lb_S11_L001_R1_001_AF-SOL-805.fastq.gz</p>                                                                                                                                                                                                                                                                                                                                                                                                                                                                                                                                                                                                                                                                                                                                                                                                                                                                                                                                                                                                                                                                                                                                                                                                                                                                                                                                                                                                                                                                                                                                                                                                                                                                                                                                                                                                                                                                                                                                    |

|      |                                                                                                                                                                                                                                                                                                                                                                                                                                                                                                                                                                                                                                                                                                                                                                                                                                   |
|------|-----------------------------------------------------------------------------------------------------------------------------------------------------------------------------------------------------------------------------------------------------------------------------------------------------------------------------------------------------------------------------------------------------------------------------------------------------------------------------------------------------------------------------------------------------------------------------------------------------------------------------------------------------------------------------------------------------------------------------------------------------------------------------------------------------------------------------------|
|      | <p>2c-exp-gfp2-10-50ng-lb_S10_L001_R1_001_AF-SOL-805.fastq.gz<br/> 2b-exp-gfp2-3-50ng-lb_S9_L001_R1_001_AF-SOL-805.fastq.gz<br/> 2a-exp-gfp2-1-50ng-lb_S8_L001_R1_001_AF-SOL-805.fastq.gz<br/> 1h-con-50ng_S7_L001_R1_001_AF-SOL-805.fastq.gz</p> <p>Linear library:<br/> 1d-exp-gfp2-1-50ng-lb_S4_L001_R1_001_AF_SOL_821.fastq.gz<br/> 1e-exp-gfp2-10-50ng-lb_S5_L001_R1_001_AF_SOL_821.fastq.gz<br/> 1f-exp-gfp2-180-50ng-lb_S6_L001_R1_001_AF_SOL_821.fastq.gz<br/> 4d-con_S22_L001_R1_001.fastq.gz<br/> 4e-con_S23_L001_R1_001.fastq.gz</p>                                                                                                                                                                                                                                                                                   |
| S4-6 | <p>Circular library:<br/> 3a-exp-rol6-1-50ng-lb_S15_L001_R1_001.fastq_AF-SOL-805.gz<br/> 3b-exp-rol6-3-50ng-lb_S16_L001_R1_001_AF-SOL-805.fastq.gz<br/> 3c-exp-rol6-10-50ng-lb_S17_L001_R1_001_AF-SOL-805.fastq.gz<br/> 3d-exp-rol6-30-50ng-lb_S18_L001_R1_001_AF-SOL-805.fastq.gz<br/> 3e-exp-rol6-60-50ng-lb_S19_L001_R1_001_AF-SOL-805.fastq.gz<br/> 3f-exp-rol6-180-50ng-lb_S20_L001_R1_001_AF-SOL-805.fastq.gz<br/> 1h-con-50ng_S7_L001_R1_001_AF-SOL-805.fastq.gz<br/> 2h-con-50ng_S14_L001_R1_001_AF-SOL-805.fastq.gz</p> <p>Linear library:<br/> 3a-exp-rol6-1-50ng-lb_S13_L001_R1_001_AF_SOL_821.fastq.gz<br/> 3b-exp-rol6-10-50ng-lb_S14_L001_R1_001_AF_SOL_821.fastq.gz<br/> 3c-exp-rol6-180-50ng-lb_S15_L001_R1_001_AF_SOL_821.fastq.gz<br/> 4d-con_S22_L001_R1_001.fastq.gz<br/> 4e-con_S23_L001_R1_001.fastq.gz</p> |
| S7-9 | <p>Circular library:<br/> 3a-exp-gfp1-1-50ng-as_S15_L001_R1_001_AF_SOL_809.fastq.gz<br/> 3b-exp-gfp1-3-50ng-as_S16_L001_R1_001_AF_SOL_809.fastq.gz<br/> 3c-exp-gfp1-10-50ng-as_S17_L001_R1_001_AF_SOL_809.fastq.gz<br/> 3d-exp-gfp1-30-50ng-as_S18_L001_R1_001_AF_SOL_809.fastq.gz<br/> 3e-exp-gfp1-60-50ng-as_S19_L001_R1_001_AF_SOL_809.fastq.gz<br/> 3f-exp-gfp1-180-50ng-as_S20_L001_R1_001_AF_SOL_809.fastq.gz<br/> 3g-con-50ng_S21_L001_R1_001_AF_SOL_809.fastq.gz<br/> 3h-con-50ng_S22_L001_R1_001_AF_SOL_809.fastq.gz</p> <p>Linear library:</p>                                                                                                                                                                                                                                                                          |

|        |                                                                                                                                                                                                                                                                                                                                                                                                                                                                                                                                                                                                                                                                                                                                                                                                                                                         |
|--------|---------------------------------------------------------------------------------------------------------------------------------------------------------------------------------------------------------------------------------------------------------------------------------------------------------------------------------------------------------------------------------------------------------------------------------------------------------------------------------------------------------------------------------------------------------------------------------------------------------------------------------------------------------------------------------------------------------------------------------------------------------------------------------------------------------------------------------------------------------|
|        | <p>1a-exp-gfp1-1-50ng-as_S1_L001_R1_001_AF_SOL_820.fastq.gz<br/> 1b-exp-gfp1-3-50ng-as_S2_L001_R1_001_AF_SOL_820.fastq.gz<br/> 1c-exp-gfp1-10-50ng-as_S3_L001_R1_001_AF_SOL_820.fastq.gz<br/> 1d-exp-gfp1-30-50ng-as_S4_L001_R1_001_AF_SOL_820.fastq.gz<br/> 1e-exp-gfp1-60-50ng-as_S5_L001_R1_001_AF_SOL_820.fastq.gz<br/> 1f-exp-gfp1-180-50ng-as_S6_L001_R1_001_AF_SOL_820.fastq.gz<br/> 3g-con_S19_L001_R1_001_AF_SOL_820.fastq.gz<br/> 3h-con_S20_L001_R1_001_AF_SOL_820.fastq.gz</p>                                                                                                                                                                                                                                                                                                                                                              |
| S10-12 | <p>Circular library:<br/> 1a-exp-gfp2-1-50ng-as_S1_L001_R1_001_AF_SOL_810.fastq.gz<br/> 1b-exp-gfp2-3-50ng-as_S2_L001_R1_001_AF_SOL_810.fastq.gz<br/> 1c-exp-gfp2-10-50ng-as_S3_L001_R1_001_AF_SOL_810.fastq.gz<br/> 1d-exp-gfp2-30-50ng-as_S4_L001_R1_001_AF_SOL_810.fastq.gz<br/> 1e-exp-gfp2-60-50ng-as_S5_L001_R1_001_AF_SOL_810.fastq.gz<br/> 1f-exp-gfp2-180-50ng-as_S6_L001_R1_001_AF_SOL_810.fastq.gz<br/> 1g-con-50ng_S20_L001_R1_001_AF_SOL_810.fastq.gz<br/> 1h-con-50ng_S7_L001_R1_001_AF_SOL_810.fastq.gz</p> <p>Linear library:<br/> 1a-exp-gfp2-1-50ng-as_S1_L001_R1_001_AF_SOL_821.fastq.gz<br/> 1b-exp-gfp2-10-50ng-as_S2_L001_R1_001_AF_SOL_821.fastq.gz<br/> 1c-exp-gfp2-180-50ng-as_S3_L001_R1_001_AF_SOL_821.fastq.gz<br/> 4d-con_S22_L001_R1_001_AF_SOL_821.fastq.gz<br/> 4e-con_S23_L001_R1_001_AF_SOL_821.fastq.gz</p>          |
| S13-15 | <p>Circular library:<br/> 1a-exp-unc22-1-50ng-lb_S1_L001_R1_001_AF_SOL_809.fastq.gz<br/> 1b-exp-unc22-3-50ng-lb_S2_L001_R1_001_AF_SOL_809.fastq.gz<br/> 1c-exp-unc22-10-50ng-lb_S3_L001_R1_001_AF_SOL_809.fastq.gz<br/> 1d-exp-unc22-30-50ng-lb_S4_L001_R1_001_AF_SOL_809.fastq.gz<br/> 1e-exp-unc22-60-50ng-lb_S5_L001_R1_001_AF_SOL_809.fastq.gz<br/> 1f-exp-unc22-180-50ng-lb_S6_L001_R1_001_AF_SOL_809.fastq.gz<br/> 1h-con-50ng_S7_L001_R1_001_AF_SOL_809.fastq.gz<br/> 2h-con-50ng_S14_L001_R1_001_AF_SOL_809.fastq.gz</p> <p>Linear library:<br/> 1a-exp-unc22-1-50ng-lb_S1_L001_R1_001_AF_SOL_824.fastq.gz<br/> 1b-exp-unc22-10-50ng-lb_S2_L001_R1_001_AF_SOL_824.fastq.gz<br/> 1c-exp-unc22-180-50ng-lb_S3_L001_R1_001_AF_SOL_824.fastq.gz<br/> 1g-con_S20_L001_R1_001_AF_SOL_824.fastq.gz<br/> 1h-con_S19_L001_R1_001_AF_SOL_824.fastq.gz</p> |
| S16-18 | <p>Circular library:<br/> 2a-exp-rol6-180-50ng-as_S8_L001_R1_001_AF_SOL_810.fastq.gz</p>                                                                                                                                                                                                                                                                                                                                                                                                                                                                                                                                                                                                                                                                                                                                                                |

|        |                                                                                                                                                                                                                                                                                                                                                                                                                                                                                                                                                                                                                                                                                                                                                                                                                                                                                                                                                                                                                                                  |
|--------|--------------------------------------------------------------------------------------------------------------------------------------------------------------------------------------------------------------------------------------------------------------------------------------------------------------------------------------------------------------------------------------------------------------------------------------------------------------------------------------------------------------------------------------------------------------------------------------------------------------------------------------------------------------------------------------------------------------------------------------------------------------------------------------------------------------------------------------------------------------------------------------------------------------------------------------------------------------------------------------------------------------------------------------------------|
|        | <p>2b-exp-rol6-3-50ng-as_S9_L001_R1_001_AF_SOL_810.fastq.gz<br/> 2c-exp-rol6-10-50ng-as_S10_L001_R1_001_AF_SOL_810.fastq.gz<br/> 2d-exp-rol6-30-50ng-as_S11_L001_R1_001_AF_SOL_810.fastq.gz<br/> 2e-exp-rol6-60-50ng-as_S12_L001_R1_001_AF_SOL_810.fastq.gz<br/> 2f-exp-rol6-1-50ng-as_S13_L001_R1_001_AF_SOL_810.fastq.gz<br/> 1g-con-50ng_S20_L001_R1_001_AF_SOL_810.fastq.gz<br/> 1h-con-50ng_S7_L001_R1_001_AF_SOL_810.fastq.gz</p> <p>Linear library:<br/> 2d-exp-rol6-1-50ng-as_S10_L001_R1_001_AF_SOL_821.fastq.gz<br/> 2e-exp-rol6-10-50ng-as_S11_L001_R1_001_AF_SOL_821.fastq.gz<br/> 2f-exp-rol6-180-50ng-as_S12_L001_R1_001_AF_SOL_821.fastq.gz<br/> 4d-con_S22_L001_R1_001.fastq.gz<br/> 4e-con_S23_L001_R1_001.fastq.gz</p>                                                                                                                                                                                                                                                                                                         |
| S19-21 | <p>Circular library:<br/> 1a-exp-gfp1-1-50ng-fn_S1_L001_R1_001_AF_SOL_811.fastq.gz<br/> 1b-exp-gfp1-3-50ng-fn_S2_L001_R1_001_AF_SOL_811.fastq.gz<br/> 1c-exp-gfp1-10-50ng-fn_S3_L001_R1_001_AF_SOL_811.fastq.gz<br/> 1d-exp-gfp1-30-50ng-fn_S4_L001_R1_001_AF_SOL_811.fastq.gz<br/> 1e-exp-gfp1-60-50ng-fn_S5_L001_R1_001_AF_SOL_811.fastq.gz<br/> 1f-exp-gfp1-180-50ng-fn_S6_L001_R1_001_AF_SOL_811.fastq.gz<br/> 1g-con-50ng_S7_L001_R1_001_AF_SOL_811.fastq.gz<br/> 1h-con-50ng_S14_L001_R1_001_AF_SOL_811.fastq.gz</p> <p>Linear library:<br/> 3a-exp-gfp1-1-50ng-fn_S13_L001_R1_001_AF_SOL_820.fastq.gz<br/> 3b-exp-gfp1-3-50ng-fn_S14_L001_R1_001_AF_SOL_820.fastq.gz<br/> 3c-exp-gfp1-10-50ng-fn_S15_L001_R1_001_AF_SOL_820.fastq.gz<br/> 3d-exp-gfp1-30-50ng-fn_S16_L001_R1_001_AF_SOL_820.fastq.gz<br/> 3e-exp-gfp1-60-50ng-fn_S17_L001_R1_001_AF_SOL_820.fastq.gz<br/> 3f-exp-gfp1-360-50ng-fn_S18_L001_R1_001_AF_SOL_820.fastq.gz<br/> 3g-con_S19_L001_R1_001_AF_SOL_820.fastq.gz<br/> 3h-con_S20_L001_R1_001_AF_SOL_820.fastq.gz</p> |
| S22-24 | <p>Circular library:<br/> 1g-con-50ng_S7_L001_R1_001_AF_SOL_811.fastq.gz<br/> 1h-con-50ng_S14_L001_R1_001_AF_SOL_811.fastq.gz<br/> 2a-exp-gfp2-1-50ng-fn_S8_L001_R1_001_AF_SOL_811.fastq.gz<br/> 2b-exp-gfp2-3-50ng-fn_S9_L001_R1_001_AF_SOL_811.fastq.gz<br/> 2c-exp-gfp2-10-50ng-fn_S10_L001_R1_001_AF_SOL_811.fastq.gz<br/> 2d-exp-gfp2-30-50ng-fn_S11_L001_R1_001_AF_SOL_811.fastq.gz<br/> 2e-exp-gfp2-60-50ng-fn_S12_L001_R1_001_AF_SOL_811.fastq.gz<br/> 2f-exp-gfp2-180-50ng-fn_S13_L001_R1_001_AF_SOL_811.fastq.gz</p> <p>Linear library:<br/> 2a-exp-gfp2-1-50ng-fn_S7_L001_R1_001_AF_SOL_821.fastq.gz</p>                                                                                                                                                                                                                                                                                                                                                                                                                              |

|        |                                                                                                                                                                                                                                                                                                                                                                                                                                                                                                                                                                                                                                                                                                                                                                                                                                                         |
|--------|---------------------------------------------------------------------------------------------------------------------------------------------------------------------------------------------------------------------------------------------------------------------------------------------------------------------------------------------------------------------------------------------------------------------------------------------------------------------------------------------------------------------------------------------------------------------------------------------------------------------------------------------------------------------------------------------------------------------------------------------------------------------------------------------------------------------------------------------------------|
|        | <p>2b-exp-gfp2-10-50ng-fn_S8_L001_R1_001_AF_SOL_821.fastq.gz<br/> 2c-exp-gfp2-180-50ng-fn_S9_L001_R1_001_AF_SOL_821.fastq.gz<br/> 4d-con_S22_L001_R1_001_AF_SOL_821.fastq.gz<br/> 4e-con_S23_L001_R1_001_AF_SOL_821.fastq.gz</p>                                                                                                                                                                                                                                                                                                                                                                                                                                                                                                                                                                                                                        |
| S25-27 | <p>Circular library:<br/> 3a-exp-rol6-1-50ng-fn_S15_L001_R1_001_AF_SOL_811.fastq.gz<br/> 3b-exp-rol6-3-50ng-fn_S16_L001_R1_001_AF_SOL_811.fastq.gz<br/> 3c-exp-rol6-10-50ng-fn_S17_L001_R1_001_AF_SOL_811.fastq.gz<br/> 3d-exp-rol6-30-50ng-fn_S18_L001_R1_001_AF_SOL_811.fastq.gz<br/> 3e-exp-rol6-60-50ng-fn_S19_L001_R1_001_AF_SOL_811.fastq.gz<br/> 3f-exp-rol6-180-50ng-fn_S20_L001_R1_001_AF_SOL_811.fastq.gz<br/> 1g-con-50ng_S7_L001_R1_001_AF_SOL_811.fastq.gz<br/> 1h-con-50ng_S14_L001_R1_001_AF_SOL_811.fastq.gz</p> <p>Linear library:<br/> 3d-exp-rol6-1-50ng-fn_S16_L001_R1_001_AF_SOL_821.fastq.gz<br/> 3e-exp-rol6-10-50ng-fn_S17_L001_R1_001_AF_SOL_821.fastq.gz<br/> 3f-exp-rol6-180-50ng-fn_S18_L001_R1_001_AF_SOL_821.fastq.gz<br/> 4d-con_S22_L001_R1_001_AF_SOL_821.fastq.gz<br/> 4e-con_S23_L001_R1_001_AF_SOL_821.fastq.gz</p> |
| S34-36 | <p>Circular library:<br/> 3a-exp-gfp1-3-50ng-cas9-circ-typell_S15_L001_R1_001_AF_SOL_854.fastq.gz<br/> 3b-exp-gfp1-10-50ng-cas9-circ-typell_S16_L001_R1_001_AF_SOL_854.fastq.gz<br/> 3c-exp-gfp1-30-50ng-cas9-circ-typell_S17_L001_R1_001_AF_SOL_854.fastq.gz<br/> 3d-exp-gfp1-180-50ng-cas9-circ-typell_S18_L001_R1_001_AF_SOL_854.fastq.gz<br/> 1f-con-cas9-typell_S5_L001_R1_001_AF_SOL_854.fastq.gz<br/> 1g-con-cas9-typell_S6_L001_R1_001_AF_SOL_854.fastq.gz</p>                                                                                                                                                                                                                                                                                                                                                                                  |
| S37-39 | <p>Circular library:<br/> 2e-exp-gfp2-3-50ng-cas9-circ-typell_S11_L001_R1_001_AF_SOL_854.fastq.gz<br/> 2f-exp-gfp2-10-50ng-cas9-circ-typell_S12_L001_R1_001_AF_SOL_854.fastq.gz<br/> 2g-exp-gfp2-30-50ng-cas9-circ-typell_S13_L001_R1_001_AF_SOL_854.fastq.gz<br/> 2h-exp-gfp2-180-50ng-cas9-circ-typell_S14_L001_R1_001_AF_SOL_854.fastq.gz<br/> 1f-con-cas9-typell_S5_L001_R1_001_AF_SOL_854.fastq.gz<br/> 1g-con-cas9-typell_S6_L001_R1_001_AF_SOL_854.fastq.gz</p>                                                                                                                                                                                                                                                                                                                                                                                  |
| S40-42 | <p>Circular library:<br/> 1f-con-cas9-typell_S5_L001_R1_001_AF_SOL_854.fastq.gz<br/> 1g-con-cas9-typell_S6_L001_R1_001_AF_SOL_854.fastq.gz<br/> 2a-exp-rol6-3-50ng-cas9-circ-typell_S7_L001_R1_001_AF_SOL_854.fastq.gz<br/> 2b-exp-rol6-10-50ng-cas9-circ-typell_S8_L001_R1_001_AF_SOL_854.fastq.gz<br/> 2c-exp-rol6-30-50ng-cas9-circ-typell_S9_L001_R1_001_AF_SOL_854.fastq.gz<br/> 2d-exp-rol6-180-50ng-cas9-circ-typell_S10_L001_R1_001_AF_SOL_854.fastq.gz</p>                                                                                                                                                                                                                                                                                                                                                                                     |



|        |                                                                                                                                                                                                                                                                                                                                                                                                                                                                                                                                               |
|--------|-----------------------------------------------------------------------------------------------------------------------------------------------------------------------------------------------------------------------------------------------------------------------------------------------------------------------------------------------------------------------------------------------------------------------------------------------------------------------------------------------------------------------------------------------|
| S43-45 | <p>Circular library:</p> <p>1a-exp-unc22-3-50ng-cas9-circ-buff3-typell_S1_L001_R1_001_AF_SOL_854.fastq.gz<br/> 1b-exp-unc22-10-50ng-cas9-circ-buff3-typell_S2_L001_R1_001_AF_SOL_854.fastq.gz<br/> 1d-exp-unc22-30-50ng-cas9-circ-buff3-typell_S3_L001_R1_001_AF_SOL_854.fastq.gz<br/> 1e-exp-unc22-180-50ng-cas9-circ-buff3-typell_S4_L001_R1_001_AF_SOL_854.fastq.gz<br/> 1f-con-cas9-typell_S5_L001_R1_001_AF_SOL_854.fastq.gz<br/> 1g-con-cas9-typell_S6_L001_R1_001_AF_SOL_854.fastq.gz</p>                                              |
| S47    | <p>Circular library:</p> <p>3a-exp-unc22-1-50ng-cas9_S1_L001_R1_001_AF_SOL_827.fastq.gz<br/> 3b-exp-unc22-3-50ng-cas9_S2_L001_R1_001_AF_SOL_827.fastq.gz<br/> 3c-exp-unc22-10-50ng-cas9_S3_L001_R1_001_AF_SOL_827.fastq.gz<br/> 3d-exp-unc22-30-50ng-cas9_S4_L001_R1_001_AF_SOL_827.fastq.gz<br/> 3e-exp-unc22-60-50ng-cas9_S5_L001_R1_001_AF_SOL_827.fastq.gz<br/> 3f-exp-unc22-180-50ng-cas9_S6_L001_R1_001_AF_SOL_827.fastq.gz<br/> 3g-con-cas9_S7_L001_R1_001_AF_SOL_827.fastq.gz<br/> 3h-con-cas9_S8_L001_R1_001_AF_SOL_827.fastq.gz</p> |
| S52-54 | <p>Circular library:</p> <p>1e-exp-unc22-1-50ng-cas9d10a-circ-thermobuff-typell_S5_L001_R1_001_AF_SOL_855.fastq.gz<br/> 1f-exp-unc22-10-50ng-cas9d10a-circ-thermobuff-typell_S6_L001_R1_001_AF_SOL_855.fastq.gz<br/> 1g-exp-unc22-30-50ng-cas9d10a-circ-thermobuff-typell_S7_L001_R1_001_AF_SOL_855.fastq.gz<br/> 1h-exp-unc22-60-50ng-cas9d10a-circ-thermobuff-typell_S8_L001_R1_001_AF_SOL_855.fastq.gz<br/> 2a-con-circ-cas9_S9_L001_R1_001_AF_SOL_855.fastq.gz<br/> 2b-con-circ-cas9_S10_L001_R1_001_AF_SOL_855.fastq.gz</p>              |

Supplementary Figure 1) Results from LbCpf1 interaction with pooled EGFP-2 targets. All reactions were done with NEB buffer 3.1 and conditions detailed in “Materials and Methods: High throughput in vitro target specificity assays”. Retention score profiles for whole-library assays with backbone cleavage step used (to avoid preferential recovery of nicked substrates; left panel) or not used (allowing preferential recovery of nicked substrates; right panel) for EGFP-2 single base transversions. X axis shows the positions, controls, and WT. Y axis shows the retention score. Refer to “Materials and Methods” for full conditions and retention calculations. (Method 1- Linearized library; AF\_SOL\_821, Method 2-Circular library; AF\_SOL\_805)

## LbCpf1 single base transversion effects on EGFP-2 gRNA

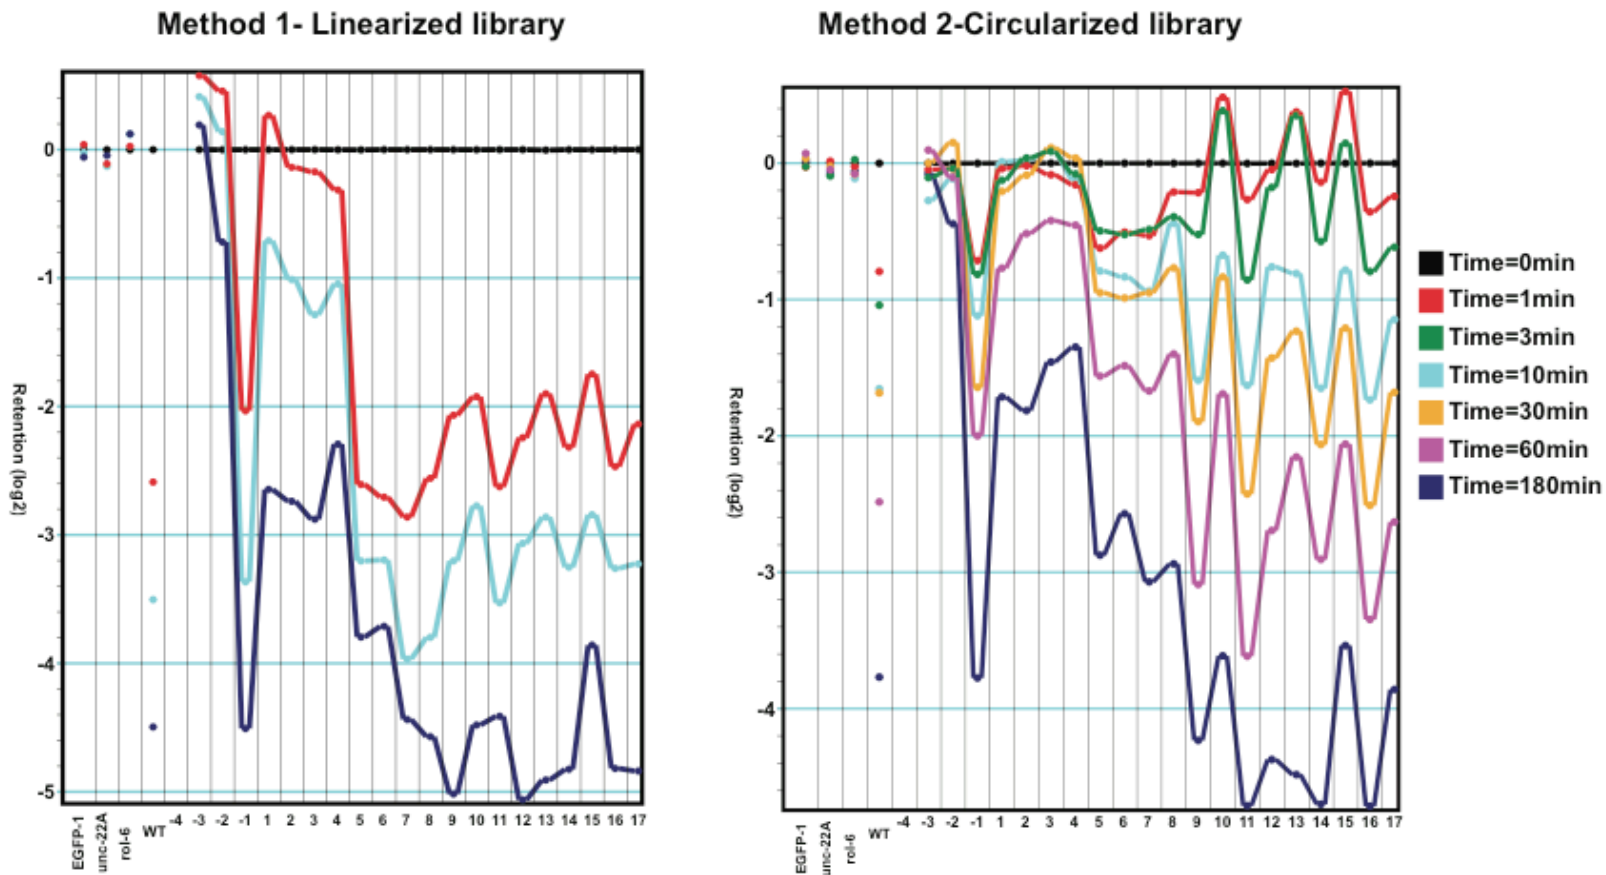

Supplementary Figure 2) Results from LbCpf1 interaction with pooled EGFP-2 targets. All reactions were done with NEB buffer 3.1 and conditions detailed in “Materials and Methods: High throughput in vitro target specificity assays”. Bar graphs of median retention scores for double consecutive variants. Error bars represent the standard deviation of the retentions for distinct sequence tags in the library matching the noted target sequence, with (n) values below each bar representing the total number of independent barcoded tags assessed for each target sequence. Refer to “Materials and Methods” for full conditions and retention calculations.

### LbCpf1 targeting EGFP-2

- |                               |                               |
|-------------------------------|-------------------------------|
| 1. TGGGACAAGCAGAAGAACGGGCATC  | 10. TTTGACAAGCCTAAGAACGGGCATC |
| 2. TTGTACAAGCAGAAGAACGGGCATC  | 11. TTTGACAAGCATCAGAACGGGCATC |
| 3. TTTTCCAAGCAGAAGAACGGGCATC  | 12. TTTGACAAGCAGCCGAACGGGCATC |
| 4. TTTGCAAAGCAGAAGAACGGGCATC  | 13. TTTGACAAGCAGACTAACGGGCATC |
| 5. TTTGAACAGCAGAAGAACGGGCATC  | 14. TTTGACAAGCAGAATCACGGGCATC |
| 6. TTTGACCCGCAGAAGAACGGGCATC  | 15. TTTGACAAGCAGAAGCCCGGCATC  |
| 7. TTTGACACTCAGAAGAACGGGCATC  | 16. TTTGACAAGCAGAAGACAGGCATC  |
| 8. TTTGACAATAAGAAGAACGGGCATC  | 17. TTTGACAAGCAGAAGAAATGCATC  |
| 9. TTTGACAAGCACGAAGAACGGGCATC | 18. TTTGACAAGCAGAAGAACTTCATC  |
|                               | 19. TTTGACAAGCAGAAGAACGTAATC  |

#### Method 1: Linearized library

#### Method 2: Circularized library

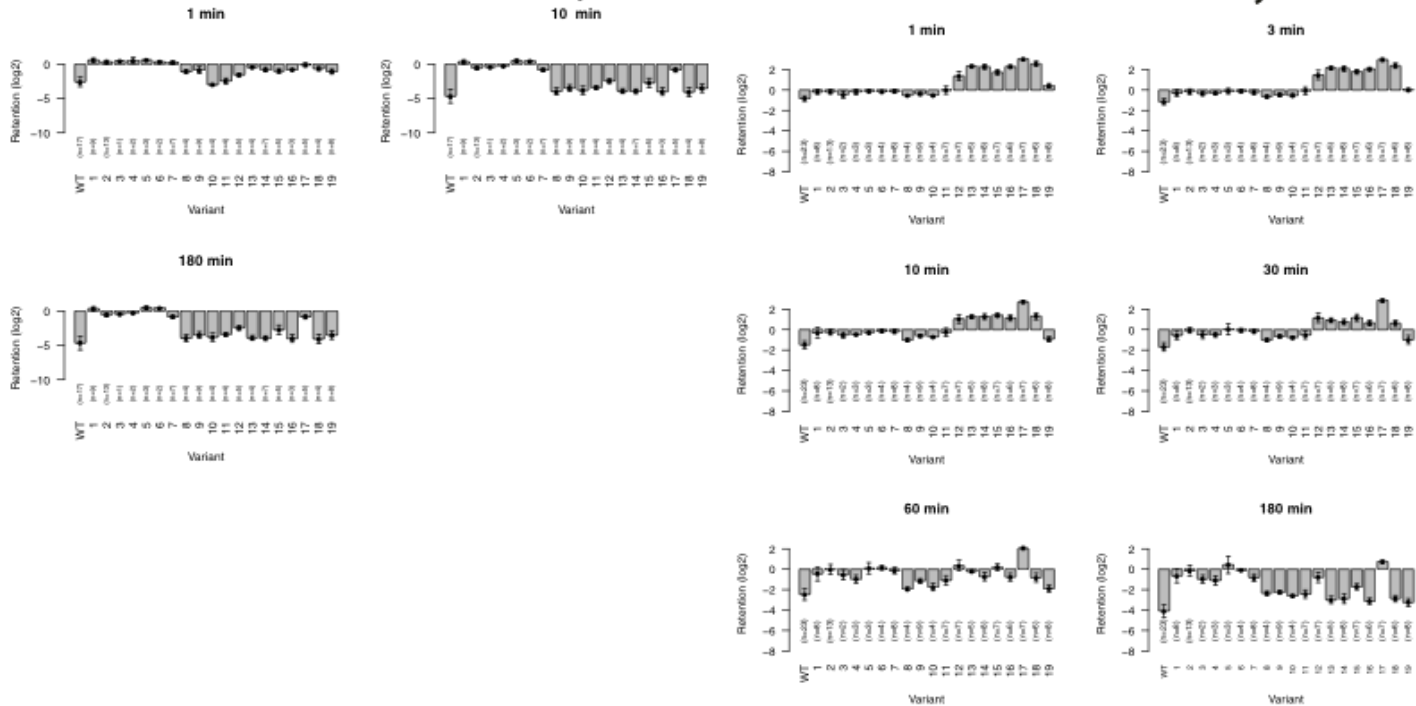

Supplementary Figure 3) Results from LbCpf1 interaction with pooled EGFP-2 targets. All reactions were done with NEB buffer 3.1 and conditions detailed in “Materials and Methods: High throughput in vitro target specificity assays”. Bar graphs of median retention scores for single-base-deletion variants. Error bars represent the standard deviation of the retentions for distinct sequence tags in the library matching the noted target sequence, with (n) values below each bar representing the total number of independent barcoded tags assessed for each target sequence. Refer to “Materials and Methods” for full conditions and retention calculations.

### LbCpf1 targeting EGFP-2

- |                             |                              |
|-----------------------------|------------------------------|
| 1. TTTG_CAAGCAGAAGAACGGCATC | 8. TTTGACAAGCAGA_GAACGGCATC  |
| 2. TTTGA_AAGCAGAAGAACGGCATC | 9. TTTGACAAGCAGAAA_ACGGCATC  |
| 3. TTTGACA_GCAGAAGAACGGCATC | 10. TTTGACAAGCAGAAGA_CGGCATC |
| 4. TTTGACAA_CAGAAGAACGGCATC | 11. TTTGACAAGCAGAAGAA_GGCATC |
| 5. TTTGACAAG_AGAAGAACGGCATC | 12. TTTGACAAGCAGAAGAAC_GCATC |
| 6. TTTGACAAGC_GAAGAACGGCATC | 13. TTTGACAAGCAGAAGAACGG_ATC |
| 7. TTTGACAAGCA_AAGAACGGCATC | 14. TTTGACAAGCAGAAGAACGGCA_C |

#### Method 1: Linearized library

#### Method 2: Circularized library

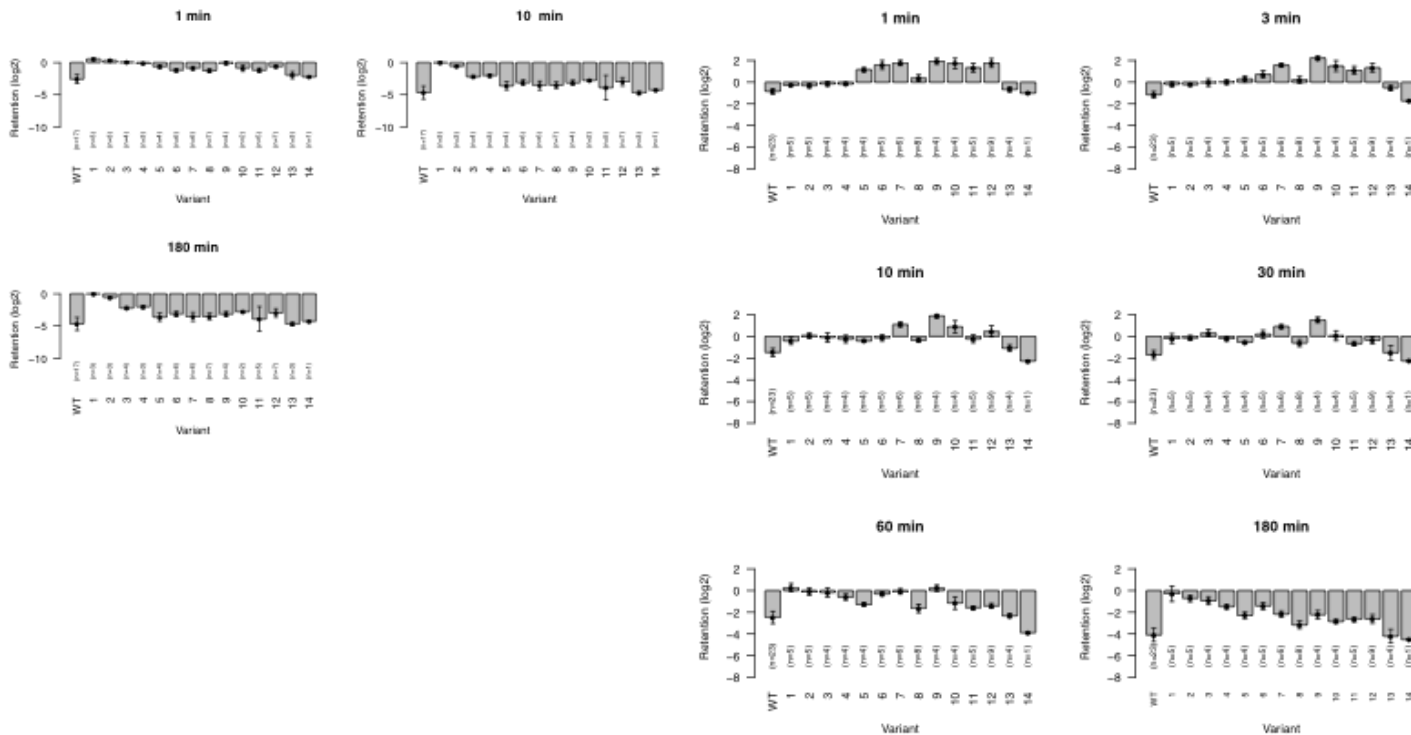

Supplementary Figure 4) Results from LbCpf1 interaction with pooled *rol-6* targets. All reactions were done with NEB buffer 3.1 and conditions detailed in “Materials and Methods: High throughput in vitro target specificity assays”. Retention score profiles for whole-library assays with backbone cleavage step used (to avoid preferential recovery of nicked substrates; left panel) or not used (allowing preferential recovery of nicked substrates; right panel) for *rol-6* single base transversions. X axis shows the positions, controls, and WT. Y axis shows the retention score. (Method 1-Linearized library, Method 2-Circular library; AF\_SOL\_805). Refer to “Materials and Methods” for full conditions and retention calculations.

### LbCpf1 single base transversion effects on *rol-6* gRNA

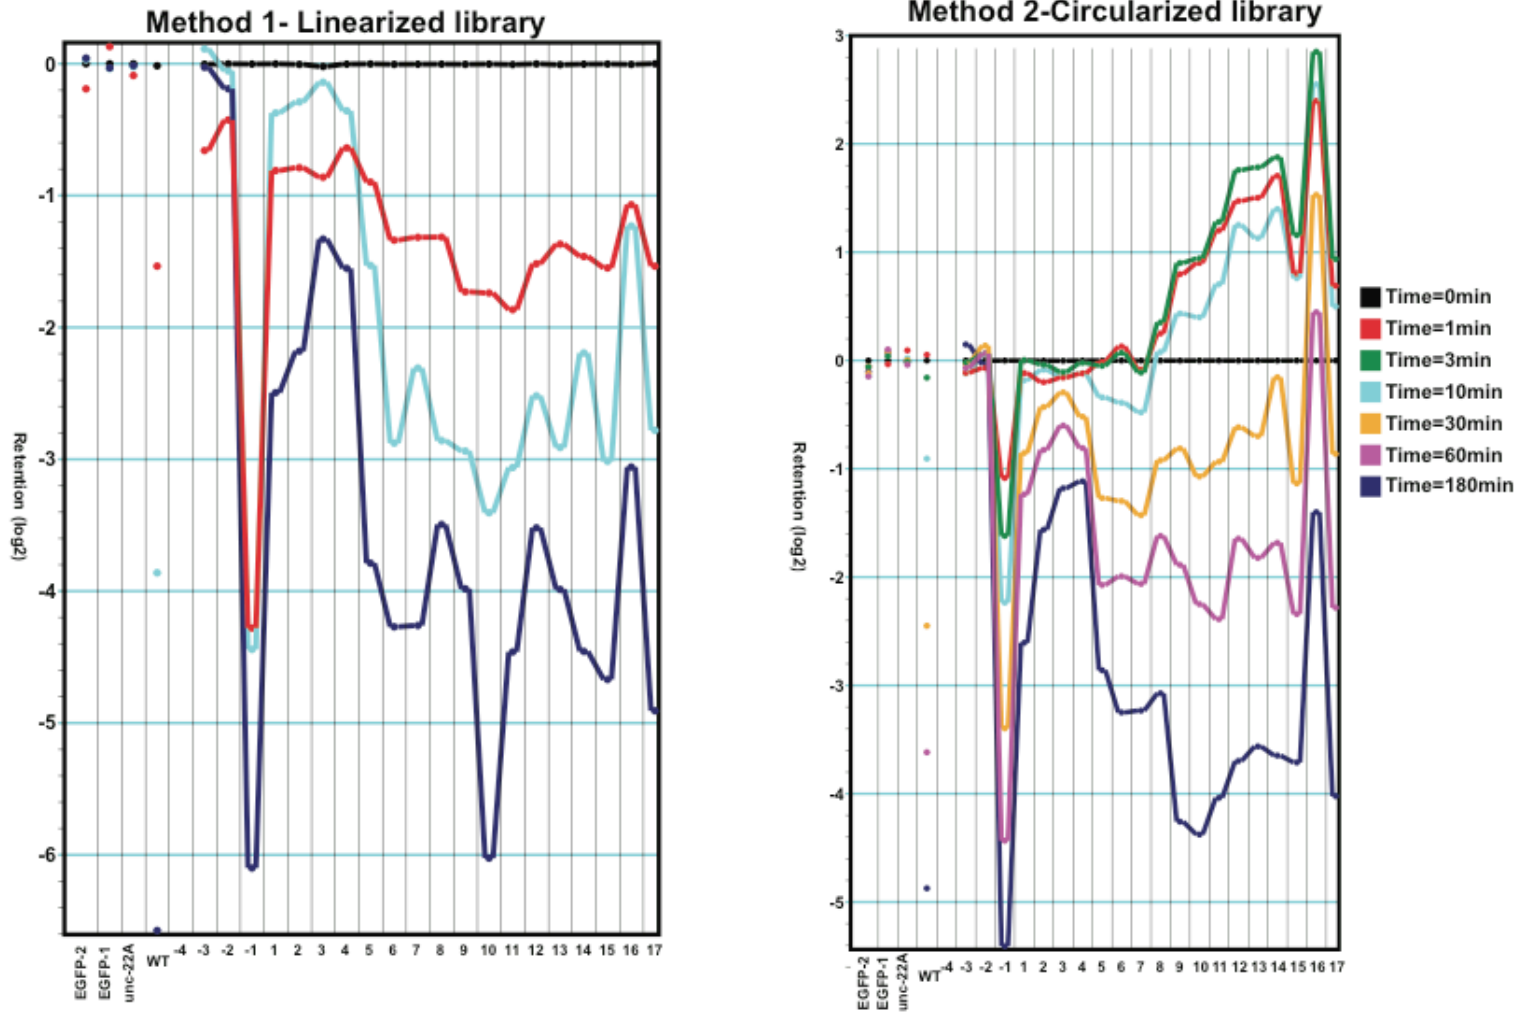

Supplementary Figure 5) Results from LbCpf1 interaction with pooled *rol-6* targets. All reactions were done with NEB buffer 3.1 and conditions detailed in “Materials and Methods: High throughput in vitro target specificity assays”. Bar graphs of median retention scores for double consecutive variants. Error bars represent the standard deviation of the retentions for distinct sequence tags in the library matching the noted target sequence, with (n) values below each bar representing the total number of independent barcoded tags assessed for each target sequence. Refer to “Materials and Methods” for full conditions and retention calculations.

### LbCpf1 targeting *rol-6*

- |                             |                              |
|-----------------------------|------------------------------|
| 1. TGGTCCATATTGTTGACGTCTCAC | 11. TTTTCCATATTTGTGACGTCTCAC |
| 2. TTGGCCATATTGTTGACGTCTCAC | 12. TTTTCCATATTGGGACGTCTCAC  |
| 3. TTTGACATATTGTTGACGTCTCAC | 13. TTTTCCATATTGTGTACGTCTCAC |
| 4. TTTTAAATATTGTTGACGTCTCAC | 14. TTTTCCATATTGTTTCGCTCTCAC |
| 5. TTTTCACTATTGTTGACGTCTCAC | 15. TTTTCCATATTGTTGCAGTCTCAC |
| 6. TTTTCCCGATTGTTGACGTCTCAC | 16. TTTTCCATATTGTTGATCTCAC   |
| 7. TTTTCCAGCTTGTGACGTCTCAC  | 17. TTTTCCATATTGTTGACTGCTCAC |
| 8. TTTTCCATCGTGTGACGTCTCAC  | 18. TTTTCCATATTGTTGACGGATCAC |
| 9. TTTTCCATAGGTTGACGTCTCAC  | 19. TTTTCCATATTGTTGACGTAGCAC |
| 10. TTTTCCATATGTTGACGTCTCAC |                              |

#### Method 1: Linearized library

#### Method 2: Circularized library

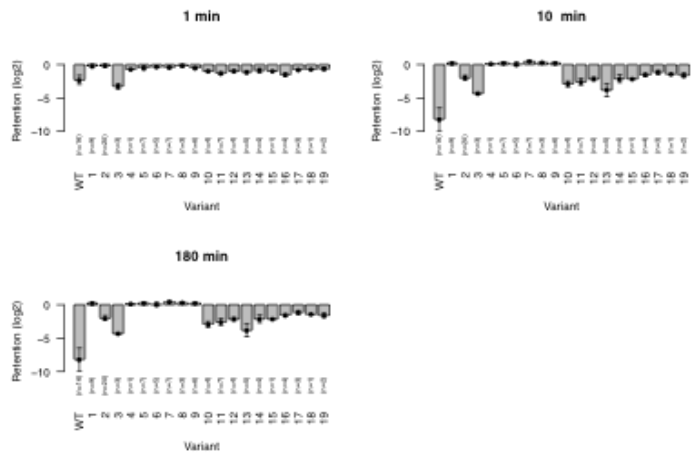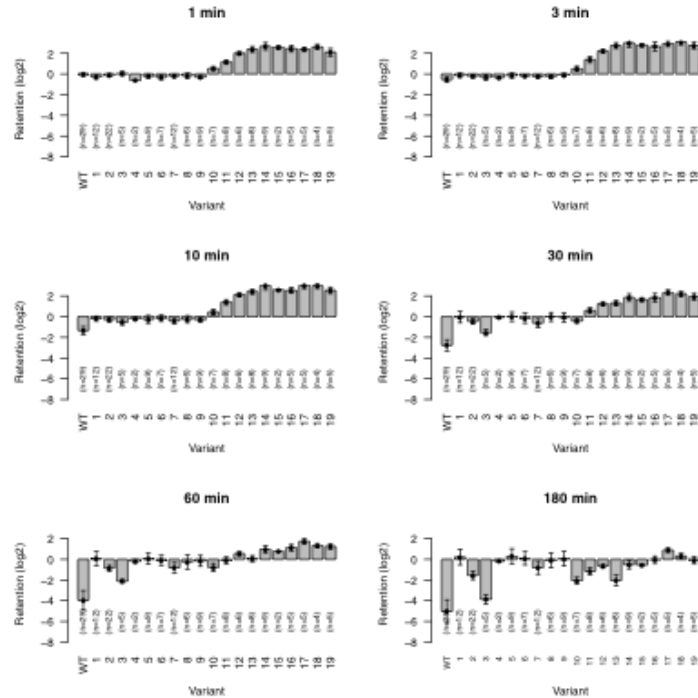

Supplementary Figure 6) Results from LbCpf1 interaction with pooled *rol-6* targets. All reactions were done with NEB buffer 3.1 and conditions detailed in “Materials and Methods: High throughput in vitro target specificity assays”. Bar graphs of median retention scores for single-base-deletion variants. Error bars represent the standard deviation of the retentions for distinct sequence tags in the library matching the noted target sequence, with (n) values below each bar representing the total number of independent barcoded tags assessed for each target sequence. Refer to “Materials and Methods” for full conditions and retention calculations.

### LbCpf1 targeting *rol-6*

- |                             |                             |
|-----------------------------|-----------------------------|
| 1. TTTT_CATATGTTGACGTCTCAC  | 8. TTTTCCATATGTT_ACGTCTCAC  |
| 2. TTTTCC_TATGTTGACGTCTCAC  | 9. TTTTCCATATGTTG_CGTCTCAC  |
| 3. TTTTCCA_ATGTTGACGTCTCAC  | 10. TTTTCCATATGTTGA_GTCTCAC |
| 4. TTTTCCAT_TTGTTGACGTCTCAC | 11. TTTTCCATATGTTGAC_TCTCAC |
| 5. TTTTCCATAT_GTTGACGTCTCAC | 12. TTTTCCATATGTTGACG_CTCAC |
| 6. TTTTCCATAT_TTGACGTCTCAC  | 13. TTTTCCATATGTTGACGT_TCAC |
| 7. TTTTCCATATGT_GACGTCTCAC  | 14. TTTTCCATATGTTGACGTC_CAC |

#### Method 1: Linearized library

#### Method 2: Circularized library

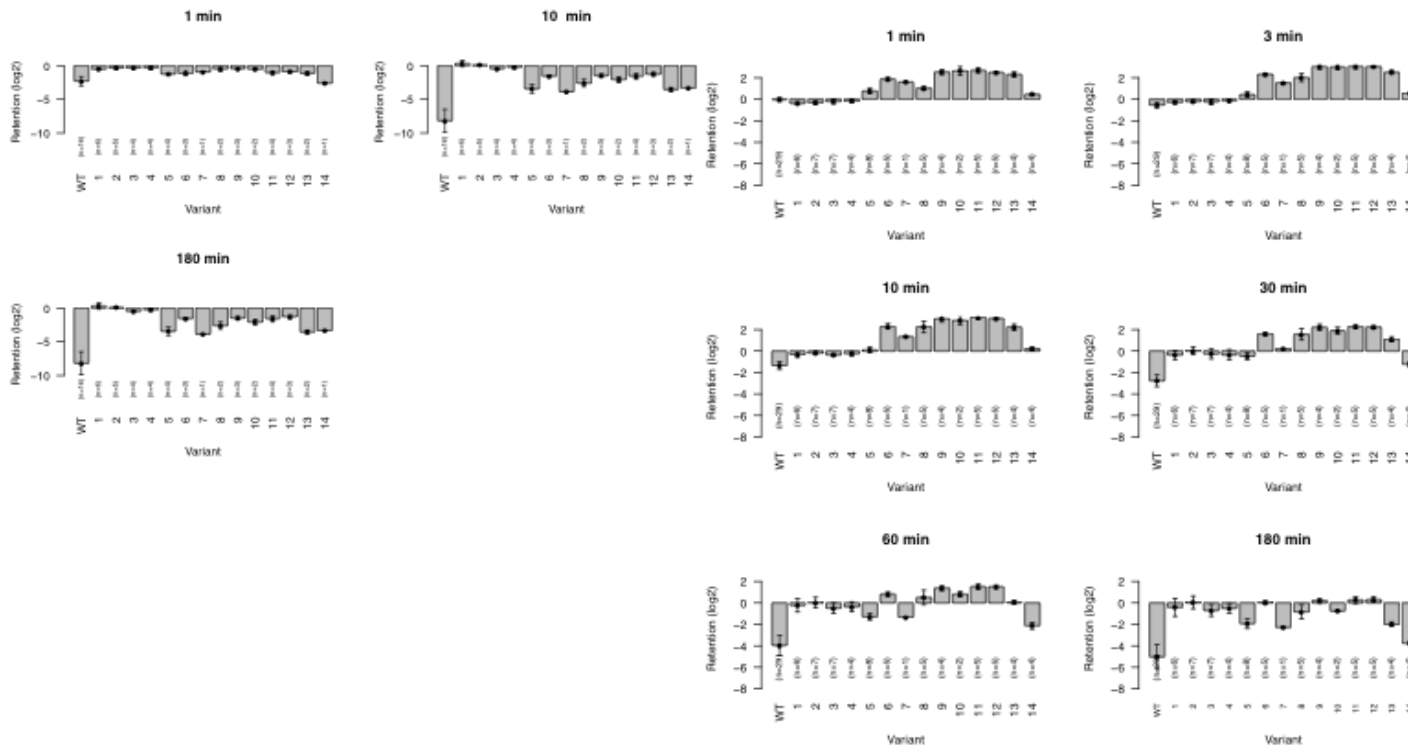



Supplementary Figure 7) Results from AsCpf1 interaction with pooled *EGFP-1* targets. All reactions were done with NEB buffer 3.1 and conditions detailed in “Materials and Methods: High throughput in vitro target specificity assays”. Retention score profiles for whole-library assays with backbone cleavage step used (to avoid preferential recovery of nicked substrates; left panel) or not used (allowing preferential recovery of nicked substrates; right panel) for *EGFP-1* single base transversions. X axis shows the positions, controls, and WT. Y axis shows the retention score. Refer to “Materials and Methods” for full conditions and retention calculations. (NEB buffer 3.1; Method 1-Linearized library; AF\_SOL\_820, Method 2-Circular library; AF\_SOL\_809)

### AsCpf1 single base transversion effects on *EGFP-1* gRNA

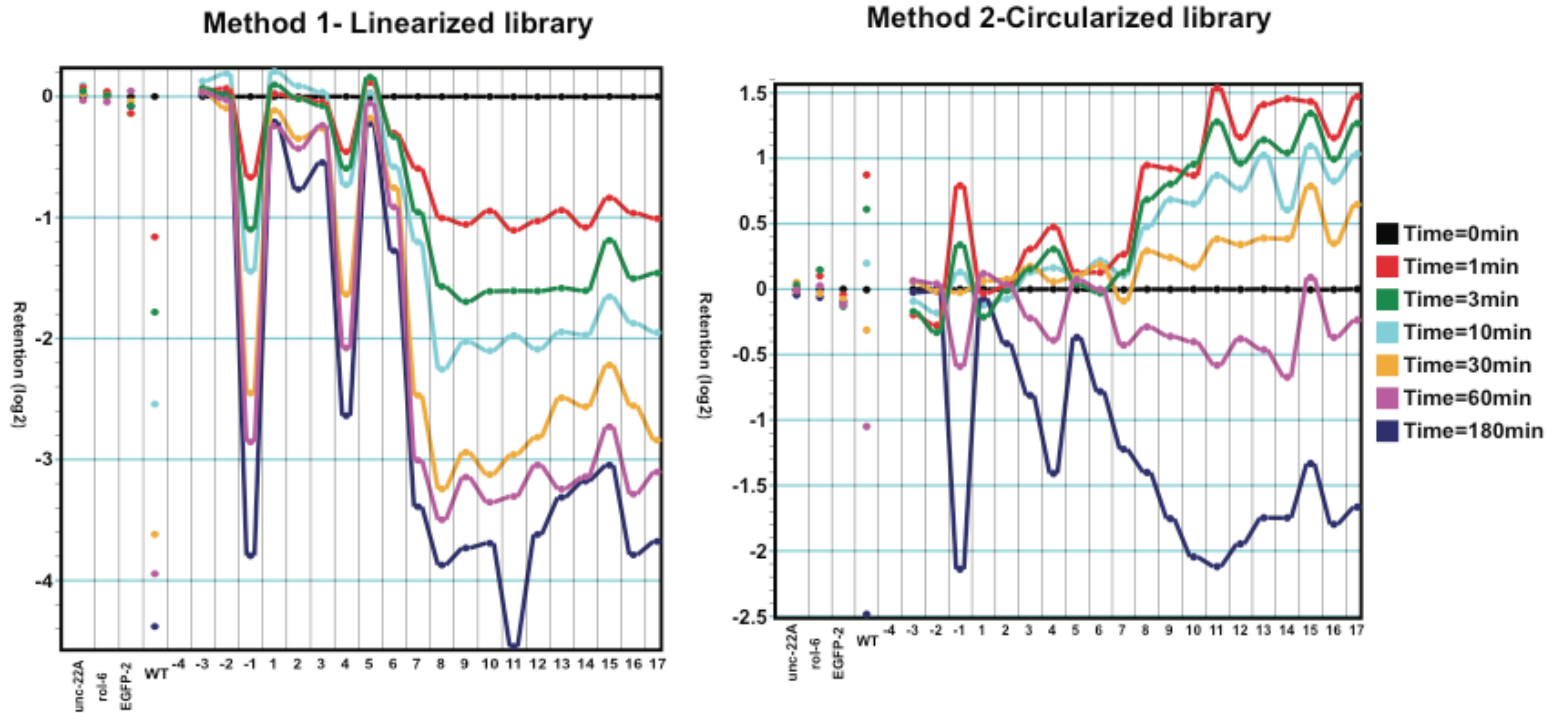



Supplementary Figure 8) Results from AsCpf1 interaction with pooled *EGFP-1* targets. All reactions were done with NEB buffer 3.1 and conditions detailed in “Materials and Methods: High throughput in vitro target specificity assays”. Bar graphs of median retention scores for double consecutive variants. Error bars represent the standard deviation of the retentions for distinct sequence tags in the library matching the noted target sequence, with (n) values below each bar representing the total number of independent barcoded tags assessed for each target sequence. Refer to “Materials and Methods” for full conditions and retention calculations.

### AsCpf1 targeting *EGFP-1*

- |                              |                              |
|------------------------------|------------------------------|
| 1. TGGACCGCAAGCTGCCCGTGCCC   | 11. TTTACCGGCAATATGCCCGTGCCC |
| 2. TTGCCCGCAAGCTGCCCGTGCCC   | 12. TTTACCGGCAAGAGGCCCGTGCCC |
| 3. TTTACCGCAAGCTGCCCGTGCCC   | 13. TTTACCGGCAAGCGTCCCGTGCCC |
| 4. TTTAAAGCAAGCTGCCCGTGCCC   | 14. TTTACCGGCAAGCTTACCGTGCCC |
| 5. TTTACATGCAAGCTGCCCGTGCCC  | 15. TTTACCGGCAAGCTGAACGTGCC  |
| 6. TTTACCTAAAGCTGCCCGTGCCC   | 16. TTTACCGGCAAGCTGCAAGTGCCC |
| 7. TTTACCGTAAAGCTGCCCGTGCCC  | 17. TTTACCGGCAAGCTGCCATGTGCC |
| 8. TTTACCGGACAGCTGCCCGTGCCC  | 18. TTTACCGGCAAGCTGCCCTGTGCC |
| 9. TTTACCGGCCCGCTGCCCGTGCCC  | 19. TTTACCGGCAAGCTGCCCGGTGCC |
| 10. TTTACCGGCACTGTGCCCGTGCCC |                              |

#### Method 1: Linearized library

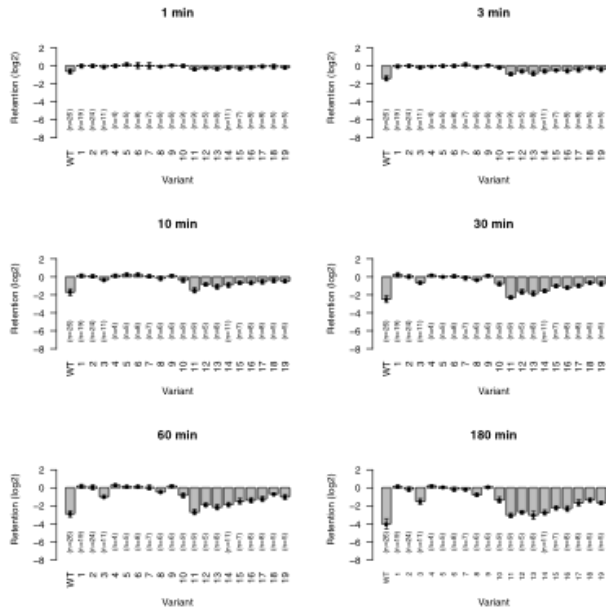

#### Method 2: Circularized library

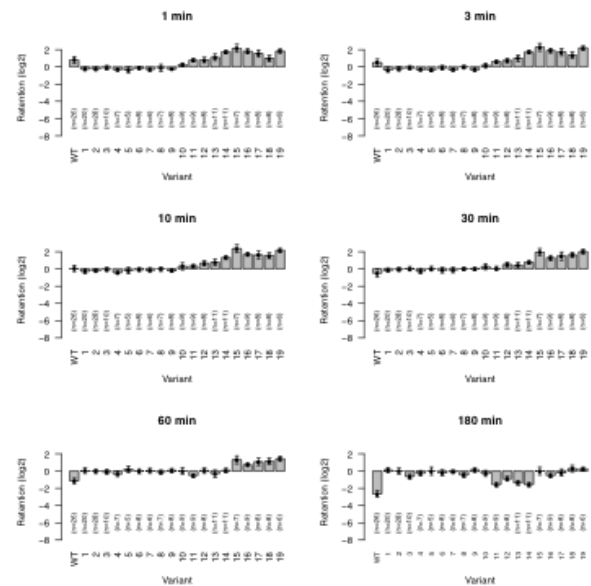

Supplementary Figure 9) Results from AsCpf1 interaction with pooled *EGFP-1* targets. All reactions were done with NEB buffer 3.1 and conditions detailed in “Materials and Methods: High throughput in vitro target specificity assays”. Bar graphs of median retention scores for single-base-deletion variants. Error bars represent the standard deviation of the retentions for distinct sequence tags in the library matching the noted target sequence, with (n) values below each bar representing the total number of independent barcoded tags assessed for each target sequence. Refer to “Materials and Methods” for full conditions and retention calculations.

### AsCpf1 targeting *EGFP-1*

- |                             |                             |
|-----------------------------|-----------------------------|
| 1. TTTA_CGGCAAGCTGCCCGTGCCC | 7. TTTACGGCAAGC_GCCCGTGCCC  |
| 2. TTTACC_GCAAGCTGCCCGTGCCC | 8. TTTACGGCAAGCT_CCCCGTGCCC |
| 3. TTTACCGG_AAGCTGCCCGTGCCC | 9. TTTACGGCAAGCTGCC_GTGCCC  |
| 4. TTTACCGGC_AGCTGCCCGTGCCC | 10. TTTACGGCAAGCTGCCCGTGCCC |
| 5. TTTACCGGCAA_CTGCCCGTGCCC | 11. TTTACGGCAAGCTGCCCG_GCCC |
| 6. TTTACGGCAAG_TGCCCGTGCCC  | 12. TTTACGGCAAGCTGCCCGT_CCC |

#### Method 1: Linearized library

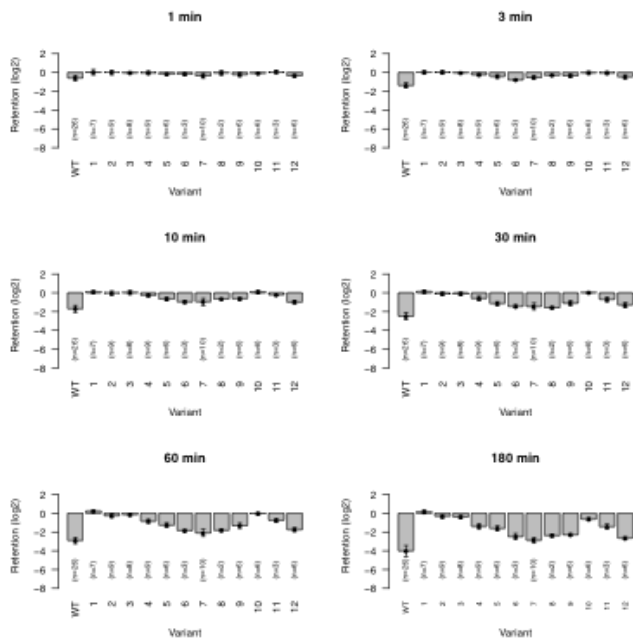

#### Method 2: Circularized library

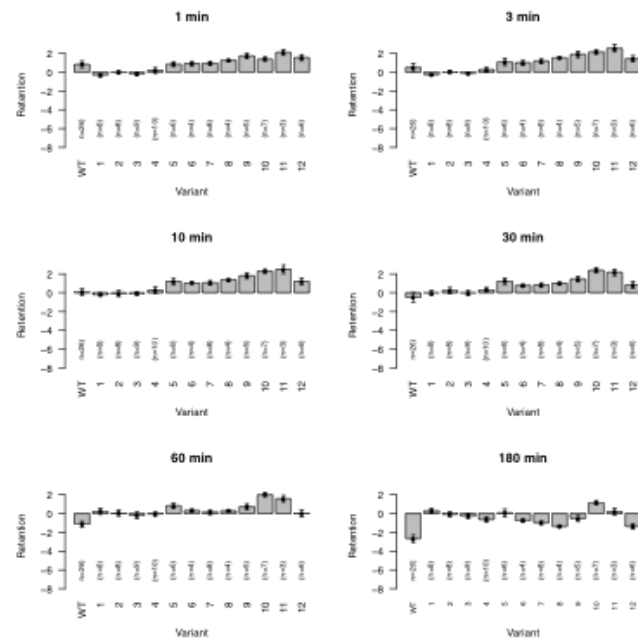

Supplementary Figure 10) Results from AsCpf1 interaction with pooled *EGFP-2 targets*. All reactions were done with NEB buffer 3.1 and conditions detailed in “Materials and Methods: High throughput in vitro target specificity assays”. Retention score profiles for whole-library assays with backbone cleavage step used (to avoid preferential recovery of nicked substrates; left panel) or not used (allowing preferential recovery of nicked substrates; right panel) for EGFP-2 single base transversions. X axis shows the positions, controls, and WT. Y axis shows the retention score. Refer to “Materials and Methods” for full conditions and calculations. (Method 1-Linearized library; AF\_SOL\_821, Method 2-Circular library; AF\_SOL\_810; NEB buffer 3.1).

**AsCpf1 single base transversion effects on EGFP-2 gRNA**

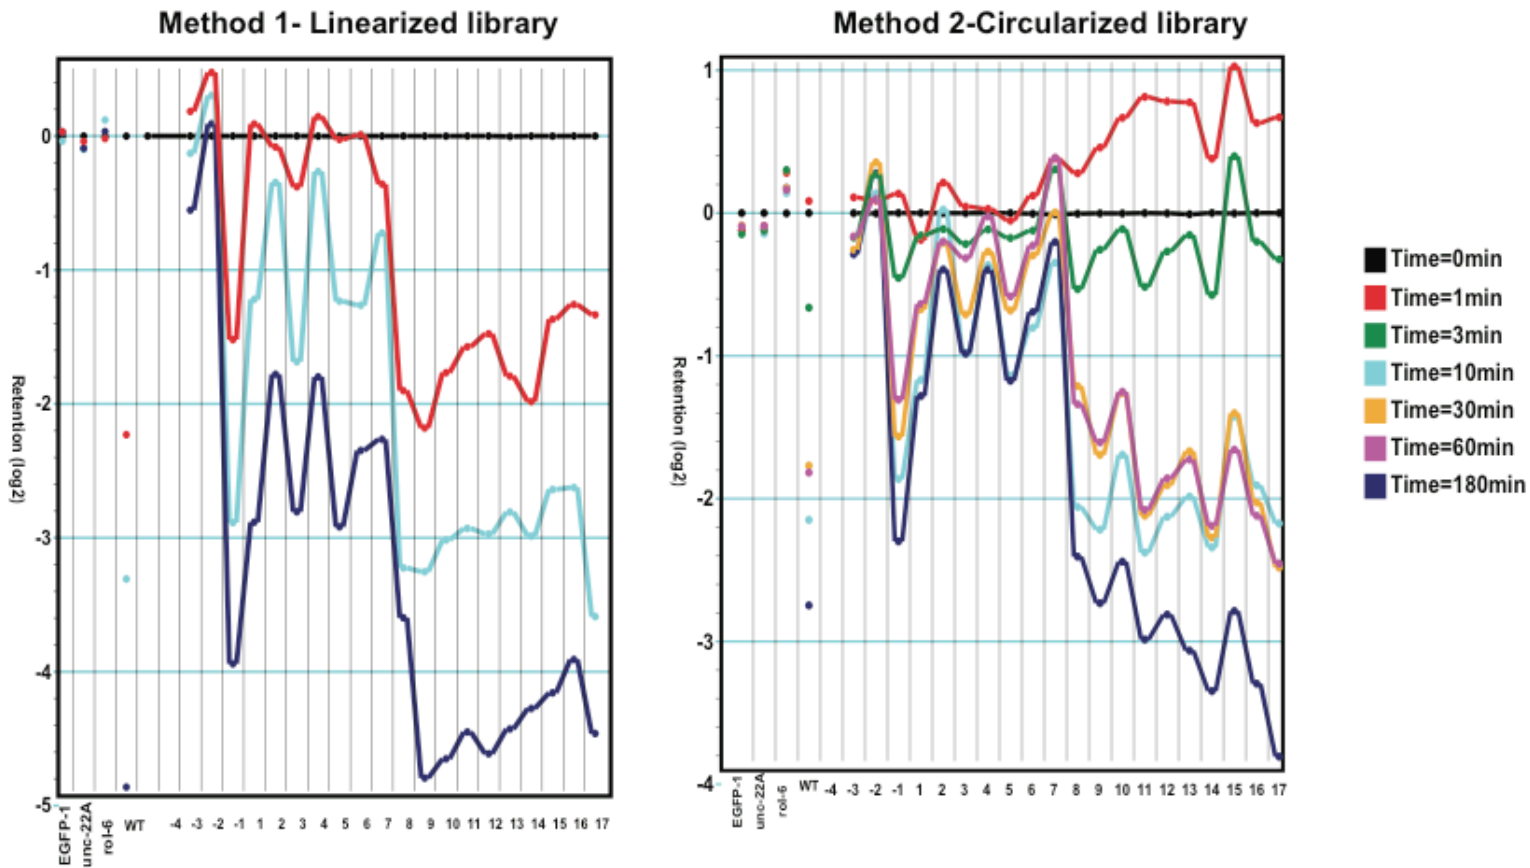

Supplementary Figure 11) Results from AsCpf1 interaction with pooled *EGFP-2 targets*. All reactions were done with NEB buffer 3.1 and conditions detailed in “Materials and Methods: High throughput in vitro target specificity assays”. Bar graphs of median retention scores for double consecutive variants. Error bars represent the standard deviation of the retentions for distinct sequence tags in the library matching the noted target sequence, with (n) values below each bar representing the total number of independent barcoded tags assessed for each target sequence. Refer to “Materials and Methods” for full conditions and retention calculations.

### AsCpf1 targeting EGFP-2

- |                               |                                |
|-------------------------------|--------------------------------|
| 1. TGGGACAAGCAGAAGAACGGGCATC  | 10. TTTGACAAGCCTAAGAACGGGCATC  |
| 2. TTGTACAAGCAGAAGAACGGGCATC  | 11. TTTGACAAGCATCAGAACGGGCATC  |
| 3. TTTTCCAAGCAGAAGAACGGGCATC  | 12. TTTGACAAGCAGCCGAACGGGCATC  |
| 4. TTTGCAAGCAGAAGAACGGGCATC   | 13. TTTGACAAGCAGACTAACGGGCATC  |
| 5. TTTGACACAGCAGAAGAACGGGCATC | 14. TTTGACAAGCAGAAATCACGGGCATC |
| 6. TTTGACCCGACAGAAGAACGGGCATC | 15. TTTGACAAGCAGAAAGCCCGGCATC  |
| 7. TTTGACACTCAGAAGAACGGGCATC  | 16. TTTGACAAGCAGAAGACAGGCATC   |
| 8. TTTGACAATAAGAAGAACGGGCATC  | 17. TTTGACAAGCAGAAGAAATGCATC   |
| 9. TTTGACAAGACGAAGAACGGGCATC  | 18. TTTGACAAGCAGAAGAACTTCATC   |
|                               | 19. TTTGACAAGCAGAAGAACGTAATC   |

#### Method 1: Linearized library

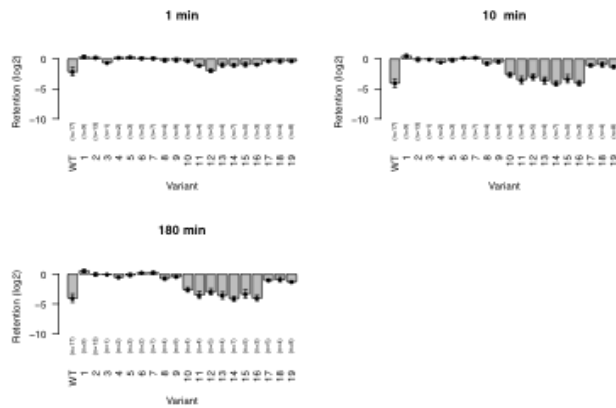

#### Method 2: Circularized library

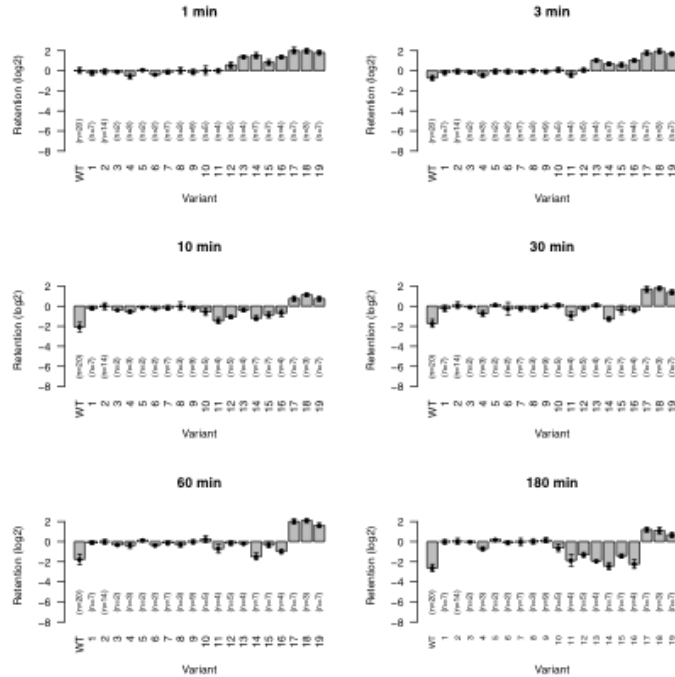

Supplementary Figure 12) Results from AsCpf1 interaction with pooled *EGFP-2 targets*. All reactions were done with NEB buffer 3.1 and conditions detailed in “Materials and Methods: High throughput in vitro target specificity assays”. Bar graphs of median retention scores for single-base-deletion variants. Error bars represent the standard deviation of the retentions for distinct sequence tags in the library matching the noted target sequence, with (n) values below each bar representing the total number of independent barcoded tags assessed for each target sequence. Refer to “Materials and Methods” for full conditions and retention calculations.

### AsCpf1 targeting EGFP-2

- |                             |                              |
|-----------------------------|------------------------------|
| 1. TTTG_CAAGCAGAAGAACGGCATC | 8. TTTGACAAGCAGA_GAACGGCATC  |
| 2. TTTGA_AAGCAGAAGAACGGCATC | 9. TTTGACAAGCAGAAA_ACGGCATC  |
| 3. TTTGACA_GCAGAAGAACGGCATC | 10. TTTGACAAGCAGAAGA_CGGCATC |
| 4. TTTGACAA_CAGAAGAACGGCATC | 11. TTTGACAAGCAGAAGAA_GGCATC |
| 5. TTTGACAAG_AGAAGAACGGCATC | 12. TTTGACAAGCAGAAGAAC_GCATC |
| 6. TTTGACAAGC_GAAGAACGGCATC | 13. TTTGACAAGCAGAAGAACGG_ATC |
| 7. TTTGACAAGCA_AAGAACGGCATC | 14. TTTGACAAGCAGAAGAACGGCA_C |

#### Method 1: Linearized library

#### Method 2: Circularized library

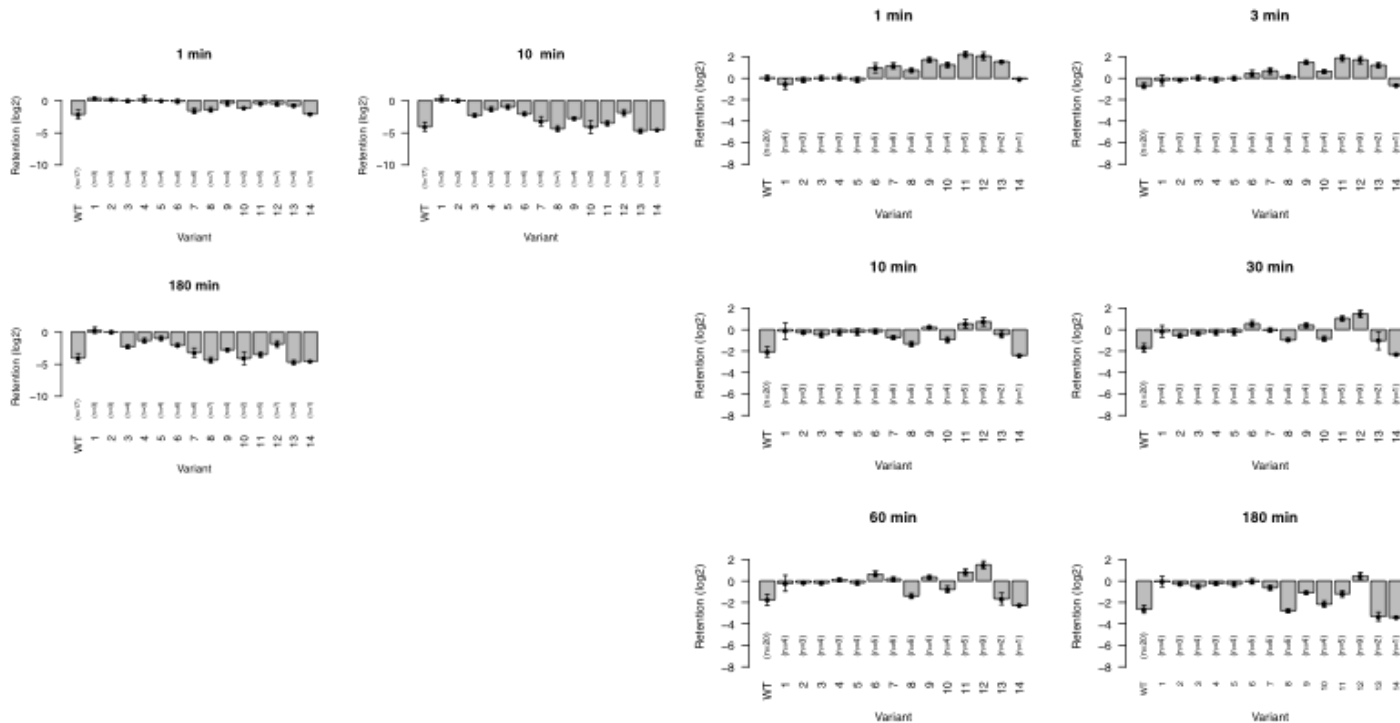

Supplementary Figure 13) Results from AsCpf1 interaction with pooled *unc-22A* targets. All reactions were done with NEB buffer 3.1 and conditions detailed in “Materials and Methods: High throughput in vitro target specificity assays”. Retention score profiles for whole-library assays with backbone cleavage step used (to avoid preferential recovery of nicked substrates; left panel) or not used (allowing preferential recovery of nicked substrates; right panel) for *unc-22A* single base transversions. X axis shows the positions, controls, and WT. Y axis shows the retention score. Refer to “Materials and Methods” for full conditions and retention calculations. (Method 1- Linearized library; AF\_SOL\_821, Method 2-Circular library; AF\_SOL\_810, NEB buffer 3.1)

### AsCpf1 single base transversion effects on *unc-22A* gRNA

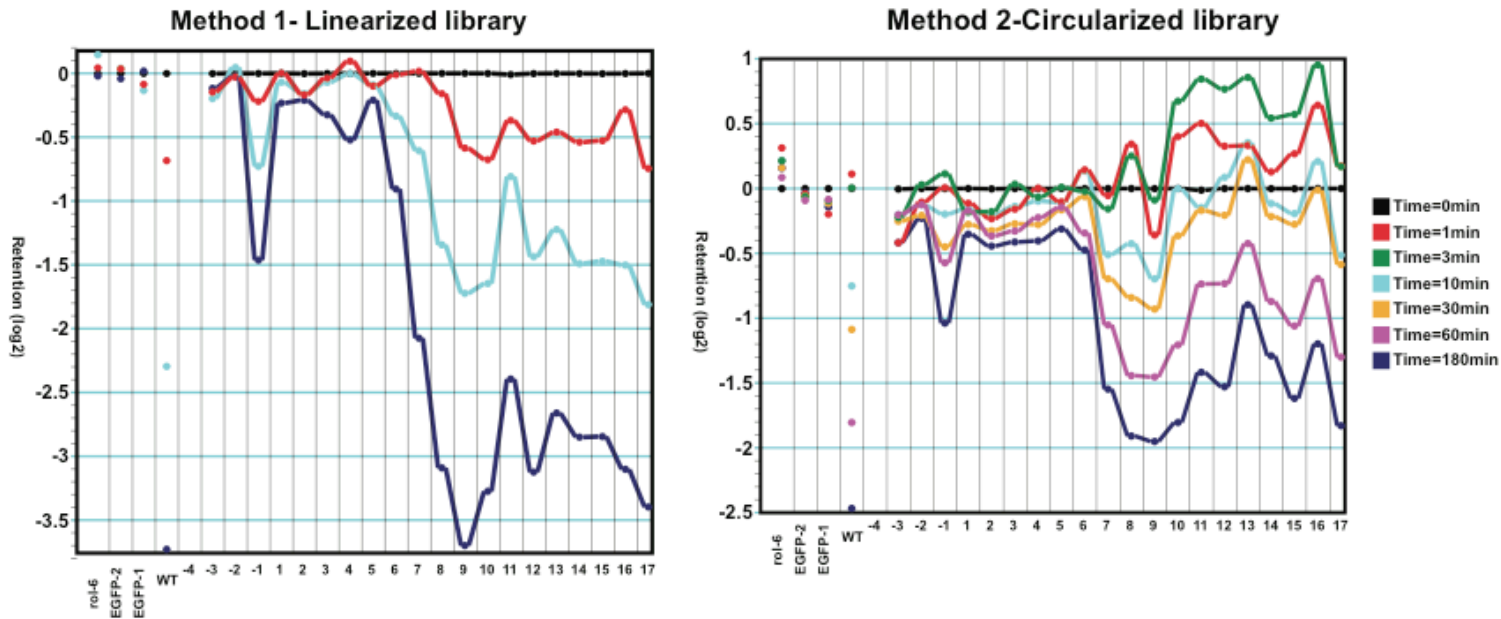

Supplementary Figure 14) Results from AsCpf1 interaction with pooled *unc-22A* targets. All reactions were done with NEB buffer 3.1 and conditions detailed in “Materials and Methods: High throughput in vitro target specificity assays”. Bar graphs of median retention scores for double consecutive variants. Error bars represent the standard deviation of the retentions for distinct sequence tags in the library matching the noted target sequence, with (n) values below each bar representing the total number of independent barcoded tags assessed for each target sequence. Refer to “Materials and Methods” for full conditions and retention calculations.

### AsCpf1 targeting *unc-22A*

- |                              |                               |
|------------------------------|-------------------------------|
| 1. TGGAAATGCCGGCGACGGTGGTGC  | 11. TTTAAATGCCGTAAGACGGTGGTGC |
| 2. TTGCAATGCCGGCGACGGTGGTGC  | 12. TTTAAATGCCGGATACGGTGGTGC  |
| 3. TTTCCATGCCGGCGACGGTGGTGC  | 13. TTTAAATGCCGGCTCCGGTGGTGC  |
| 4. TTTACCTGCCGGCGACGGTGGTGC  | 14. TTTAAATGCCGGCGCAGGTGGTGC  |
| 5. TTTAAACGGCCGGCGACGGTGGTGC | 15. TTTAAATGCCGGCGAATGTGGTGC  |
| 6. TTTAAAGTCCGGCGACGGTGGTGC  | 16. TTTAAATGCCGGCGACTTTGGTGC  |
| 7. TTTAAATACGGCGACGGTGGTGC   | 17. TTTAAATGCCGGCGACGTGGTGC   |
| 8. TTTAAATGAAGCGACGGTGGTGC   | 18. TTTAAATGCCGGCGACGGTGTGC   |
| 9. TTTAAATGCATGCGACGGTGGTGC  | 19. TTTAAATGCCGGCGACGGTTTGC   |
| 10. TTTAAATGCCTTGACGGTGGTGC  |                               |

#### Method 1: Linearized library

#### Method 2: Circularized library

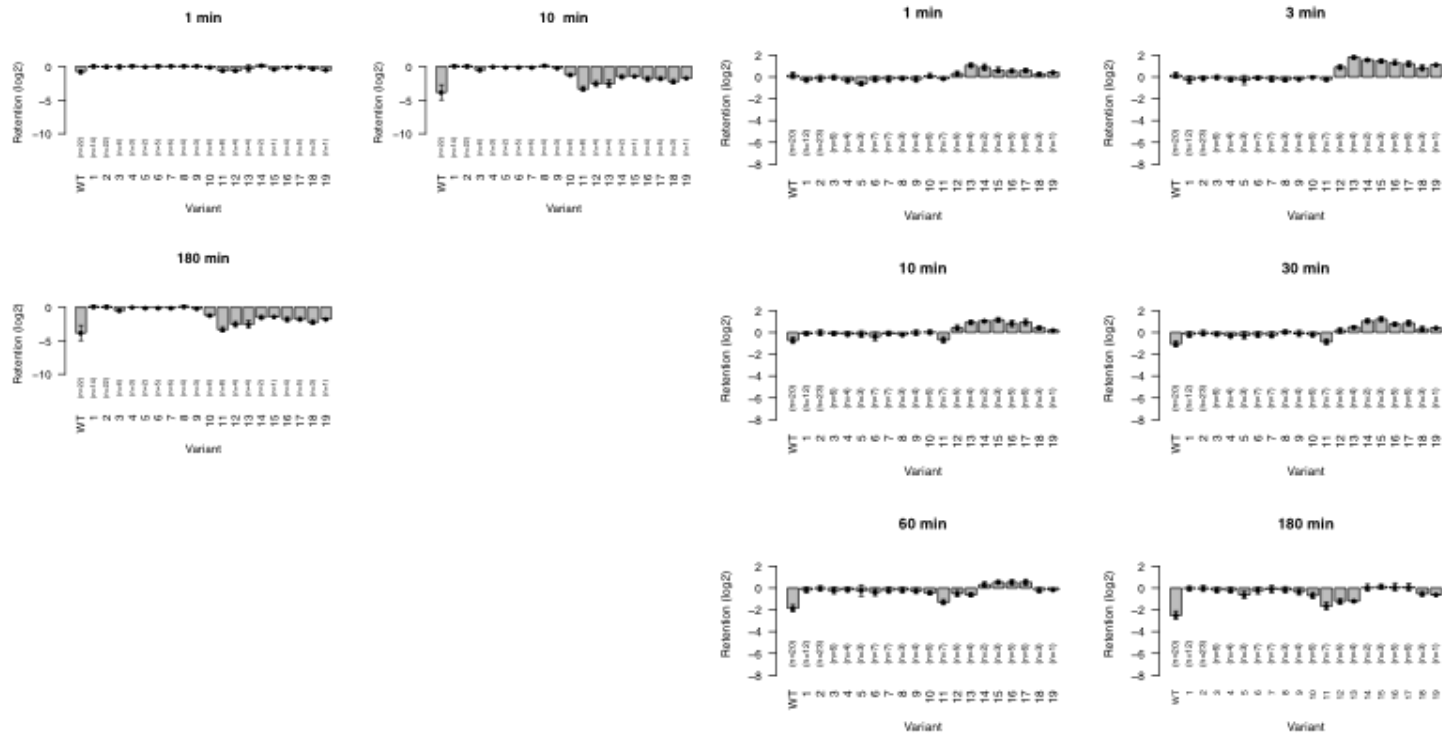



Supplementary Figure 15) Results from AsCpf1 interaction with pooled *unc-22A* targets. All reactions were done with NEB buffer 3.1 and conditions detailed in “Materials and Methods: High throughput in vitro target specificity assays”. Bar graphs of median retention scores for single-base-deletion variants. Error bars represent the standard deviation of the retentions for distinct sequence tags in the library matching the noted target sequence, with (n) values below each bar representing the total number of independent barcoded tags assessed for each target sequence. Refer to “Materials and Methods” for full conditions and retention calculations.

### AsCpf1 targeting *unc-22A*

- |                             |                              |
|-----------------------------|------------------------------|
| 1. TTTA_ATGCCGGCGACGGTGGTGC | 7. TTTAAATGCCGGC_ACGGTGGTGC  |
| 2. TTTAAA_GCCGGCGACGGTGGTGC | 8. TTTAAATGCCGGCG_CGGTGGTGC  |
| 3. TTTAAAT_CCGGCGACGGTGGTGC | 9. TTTAAATGCCGGCGA_GGTGGTGC  |
| 4. TTTAAATG_CGGCGACGGTGGTGC | 10. TTTAAATGCCGGCGACG_TGGTGC |
| 5. TTTAAATGCC_GCGACGGTGGTGC | 11. TTTAAATGCCGGCGACGG_GGTGC |
| 6. TTTAAATGCCGG_GACGGTGGTGC | 12. TTTAAATGCCGGCGACGGT_GTC  |

#### Method 1: Linearized library

#### Method 2: Circularized library

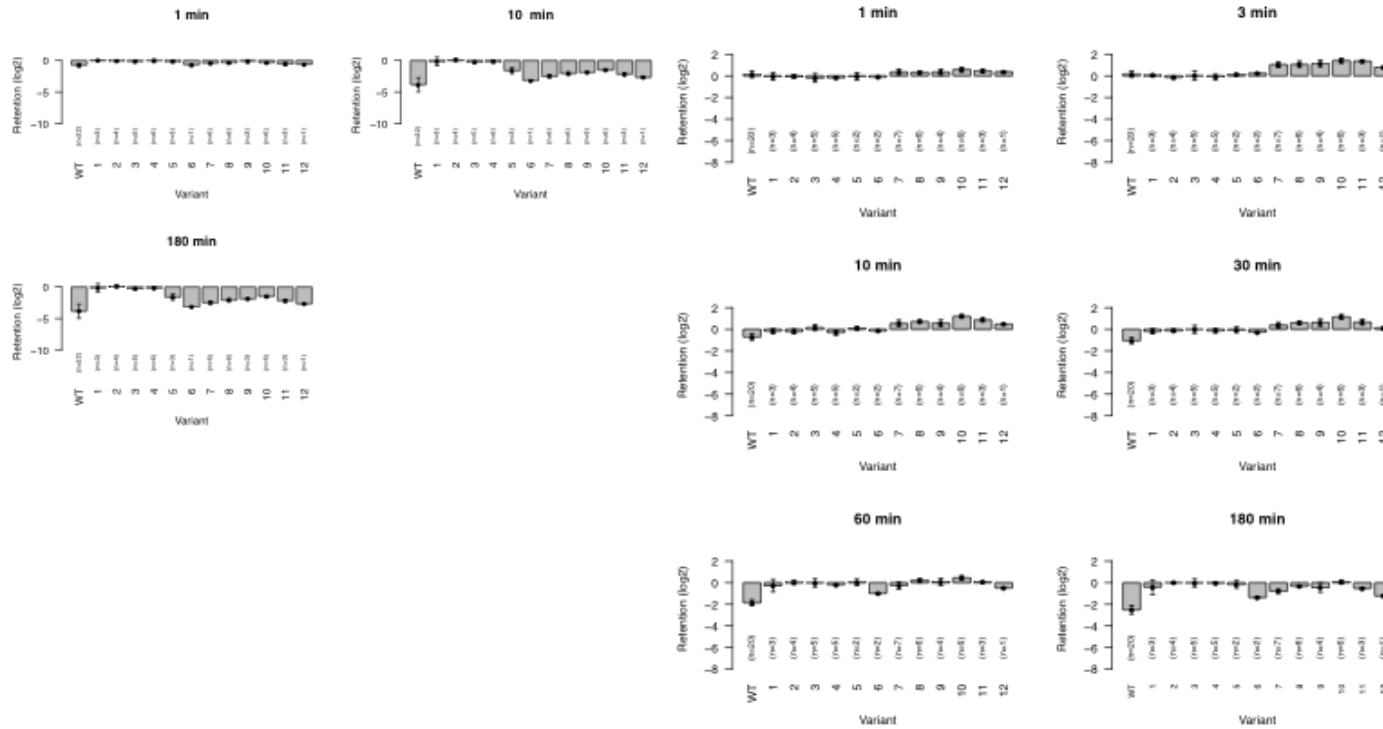



Figure 16) Results from AsCpf1 interaction with pooled *rol-6* targets. All reactions were done with NEB buffer 3.1 and conditions detailed in “Materials and Methods: High throughput in vitro target specificity assays”. Retention score profiles for whole-library assays with backbone cleavage step used (to avoid preferential recovery of nicked substrates; left panel) or not used (allowing preferential recovery of nicked substrates; right panel) for *rol-6* single base transversions. X axis shows the positions, controls, and WT. Y axis shows the retention score. Refer to “Materials and Methods” for full conditions and retention calculations. (Method 1-Linearized library; AF\_SOL\_821, Method 2-Circular library; AF\_SOL\_810; NEB buffer 3.1)

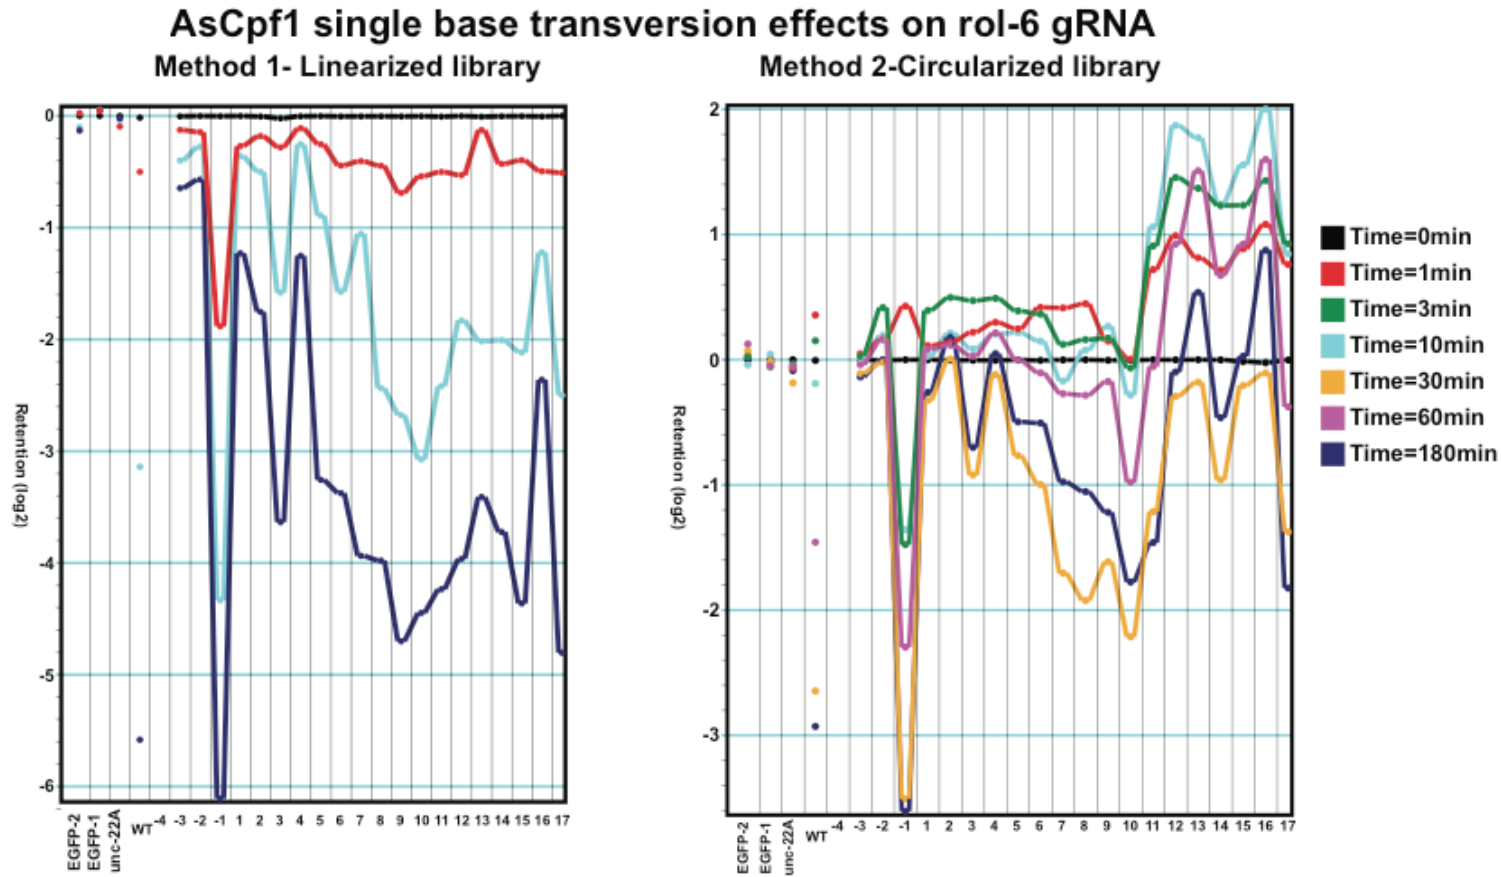

Supplementary Figure 17) Results from AsCpf1 interaction with pooled *rol-6* targets. All reactions were done with NEB buffer 3.1 and conditions detailed in “Materials and Methods: High throughput in vitro target specificity assays”. Bar graphs of median retention scores for double consecutive variants. Error bars represent the standard deviation of the retentions for distinct sequence tags in the library matching the noted target sequence, with (n) values below each bar representing the total number of independent barcoded tags assessed for each target sequence. Refer to “Materials and Methods” for full conditions and retention calculations.

### AsCpf1 targeting *rol-6*

- |                               |                               |
|-------------------------------|-------------------------------|
| 1. TGGTCCATATTGTTGACGTCTCAC   | 10. TTTTCCATATTGTGACGTCTCAC   |
| 2. TTGGCCATATTGTTGACGTCTCAC   | 11. TTTTCCATATTGGGACGTCTCAC   |
| 3. TTTGACATATTGTTGACGTCTCAC   | 12. TTTTCCATATTGTGTACGTCTCAC  |
| 4. TTTTCACTATTGTTGACGTCTCAC   | 13. TTTTCCATATTGTTCCGTCTCAC   |
| 5. TTTTCCCGATTGTTGACGTCTCAC   | 14. TTTTCCATATTGTTGCAAGTCTCAC |
| 6. TTTTCCAGCTTGTGTTGACGTCTCAC | 15. TTTTCCATATTGTTGAATTCTCAC  |
| 7. TTTTCCATCGTGTGTTGACGTCTCAC | 16. TTTTCCATATTGTTGACTGCTCAC  |
| 8. TTTTCCATAGGGTTGACGTCTCAC   | 17. TTTTCCATATTGTTGACGATCAC   |
| 9. TTTTCCATATGTTGACGTCTCAC    | 18. TTTTCCATATTGTTGACGTAGCAC  |

#### Method 1: Linearized library

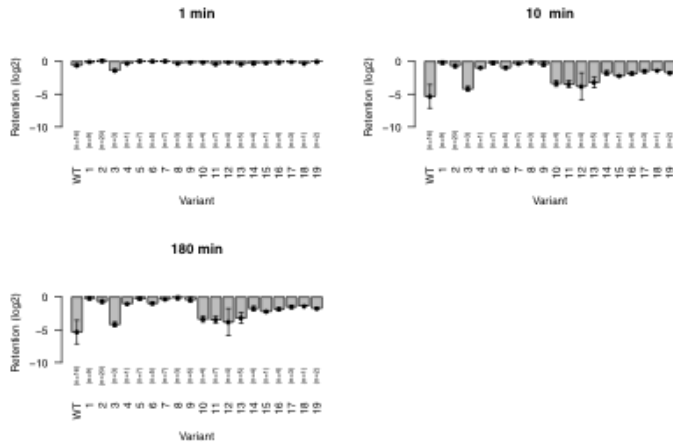

#### Method 2: Circularized library

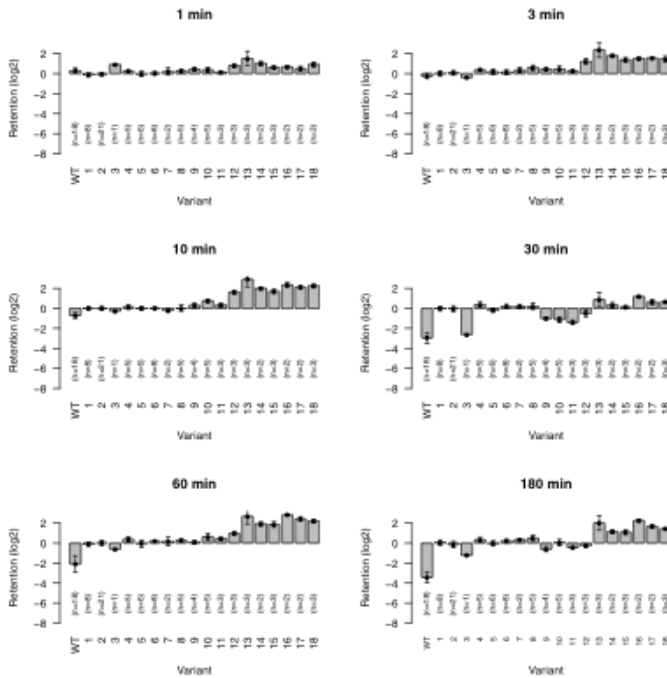

Supplementary Figure 18) Results from AsCpf1 interaction with pooled *rol-6* targets. All reactions were done with NEB buffer 3.1 and conditions detailed in “Materials and Methods: High throughput in vitro target specificity assays”. Bar graphs of median retention scores for single-base-deletion variants. Error bars represent the standard deviation of the retentions for distinct sequence tags in the library matching the noted target sequence, with (n) values below each bar representing the total number of independent barcoded tags assessed for each target sequence. Refer to “Materials and Methods” for full conditions and retention calculations.

### AsCpf1 targeting *rol-6*

- |                             |                              |
|-----------------------------|------------------------------|
| 1. TTTT_CATATTGTTGACGTCTCAC | 8. TTTTCCATATTGTT_ACGTCTCAC  |
| 2. TTTTCC_TATTGTTGACGTCTCAC | 9. TTTTCCATATTGTTG_CGTCTCAC  |
| 3. TTTTCCA_ATTGTTGACGTCTCAC | 10. TTTTCCATATTGTTGA_GTCTCAC |
| 4. TTTTCCAT_TTGTTGACGTCTCAC | 11. TTTTCCATATTGTTGAC_TCTCAC |
| 5. TTTTCCATAT_GTTGACGTCTCAC | 12. TTTTCCATATTGTTGACG_CTCAC |
| 6. TTTTCCATATT_TTGACGTCTCAC | 13. TTTTCCATATTGTTGACGT_TCAC |
| 7. TTTTCCATATTGT_GACGTCTCAC | 14. TTTTCCATATTGTTGACGTC_CAC |

#### Method 1: Linearized library

#### Method 2: Circularized library

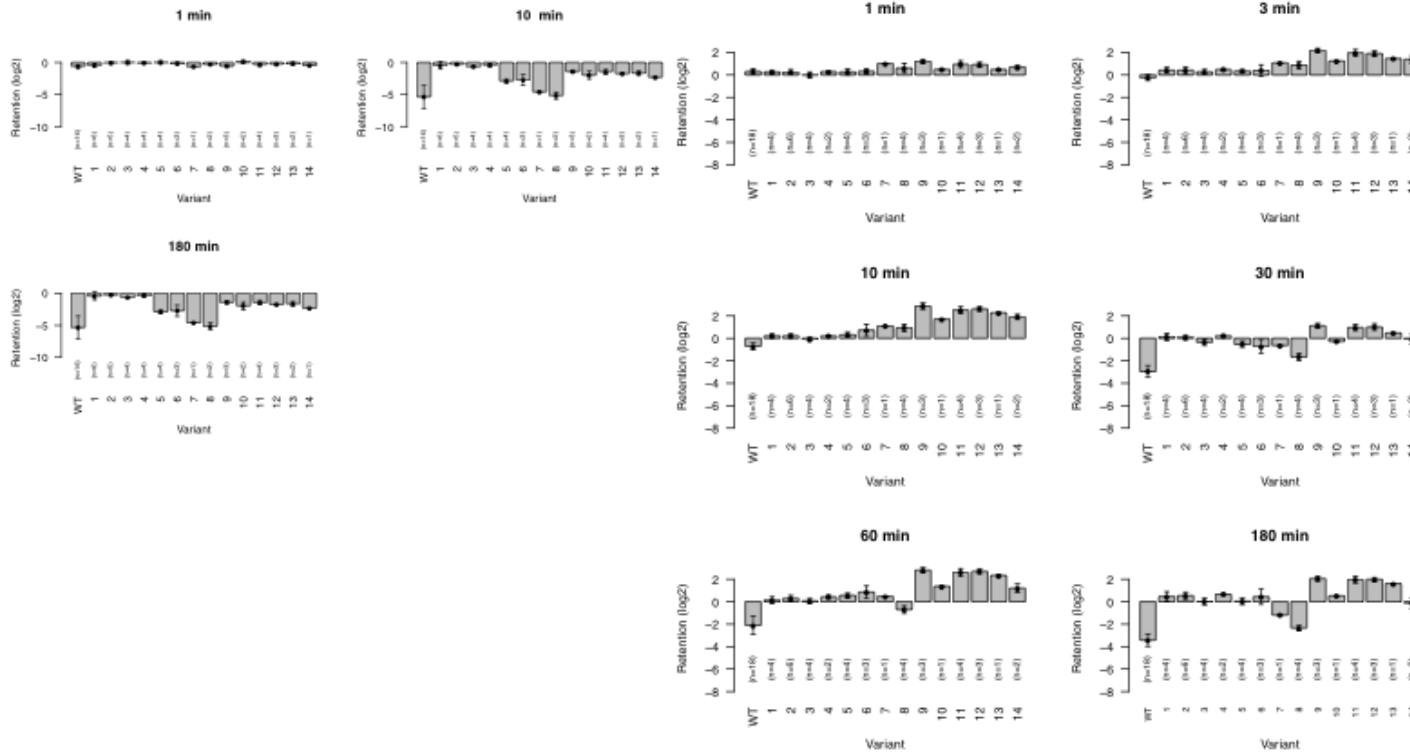

Supplementary Figure 19) Results from FnCpf1 interaction with pooled *EGFP-1* targets. All reactions were done with NEB buffer 3.1 and conditions detailed in “Materials and Methods: High throughput in vitro target specificity assays”. Retention score profiles for whole-library assays with backbone cleavage step used (to avoid preferential recovery of nicked substrates; left panel) or not used (allowing preferential recovery of nicked substrates; right panel) for *EGFP-1* single base transversions. X axis shows the positions, controls, and WT. Y axis shows the retention score. Refer to “Materials and Methods” for full conditions and retention calculations. (Method 1- Linearized library; AF\_SOL\_820, Method 2-Circular library; AF\_SOL\_811; NEB buffer 3.1).

### FnCpf1 single base transversion effects on *EGFP-1* gRNA

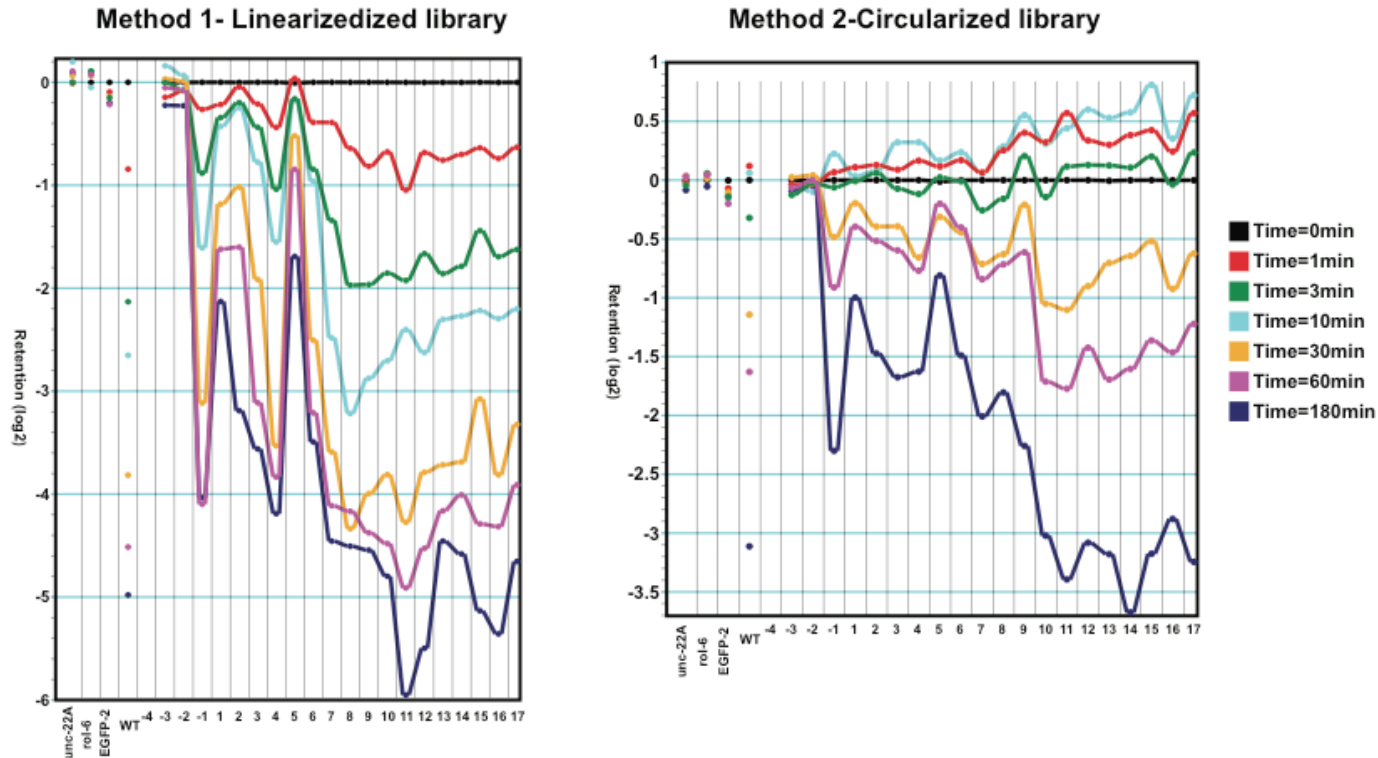

Supplementary Figure 20) Results from FnCpf1 interaction with pooled *EGFP-1* targets. All reactions were done with NEB buffer 3.1 and conditions detailed in “Materials and Methods: High throughput in vitro target specificity assays”. Bar graphs of median retention scores for double consecutive variants. Error bars represent the standard deviation of the retentions for distinct sequence tags in the library matching the noted target sequence, with (n) values below each bar representing the total number of independent barcoded tags assessed for each target sequence. Refer to “Materials and Methods” for full conditions and retention calculations.

### FnCpf1 targeting EGFP-1

- |                              |                              |
|------------------------------|------------------------------|
| 1. TGGACCGGCAAGCTGCCCCGTGCC  | 11. TTTACCGGCAATATGCCCGTGCCC |
| 2. TTGCCCGGCAAGCTGCCCGTGCCC  | 12. TTTACCGGCAAGAGGCCCGTGCCC |
| 3. TTTACCGGCAAGCTGCCCGTGCCC  | 13. TTTACCGGCAAGCGTCCCGTGCCC |
| 4. TTTAAAGGCAAGCTGCCCGTGCCC  | 14. TTTACCGGCAAGCTTACCCTGCC  |
| 5. TTTACATGCAAGCTGCCCGTGCCC  | 15. TTTACCGGCAAGCTGAACGTGCC  |
| 6. TTTACCTTCAAGCTGCCCGTGCCC  | 16. TTTACCGGCAAGCTGCAAGTGCCC |
| 7. TTTACCGTAAAGCTGCCCGTGCCC  | 17. TTTACCGGCAAGCTGCCATTGCC  |
| 8. TTTACCGGACAGCTGCCCGTGCCC  | 18. TTTACCGGCAAGCTGCCCTGGCCC |
| 9. TTTACCGGCCGCTGCCCGTGCCC   | 19. TTTACCGGCAAGCTGCCCGTCCC  |
| 10. TTTACCGGCACTCTGCCCGTGCCC |                              |

#### Method 1: Linearized library

#### Method 2: Circularized library

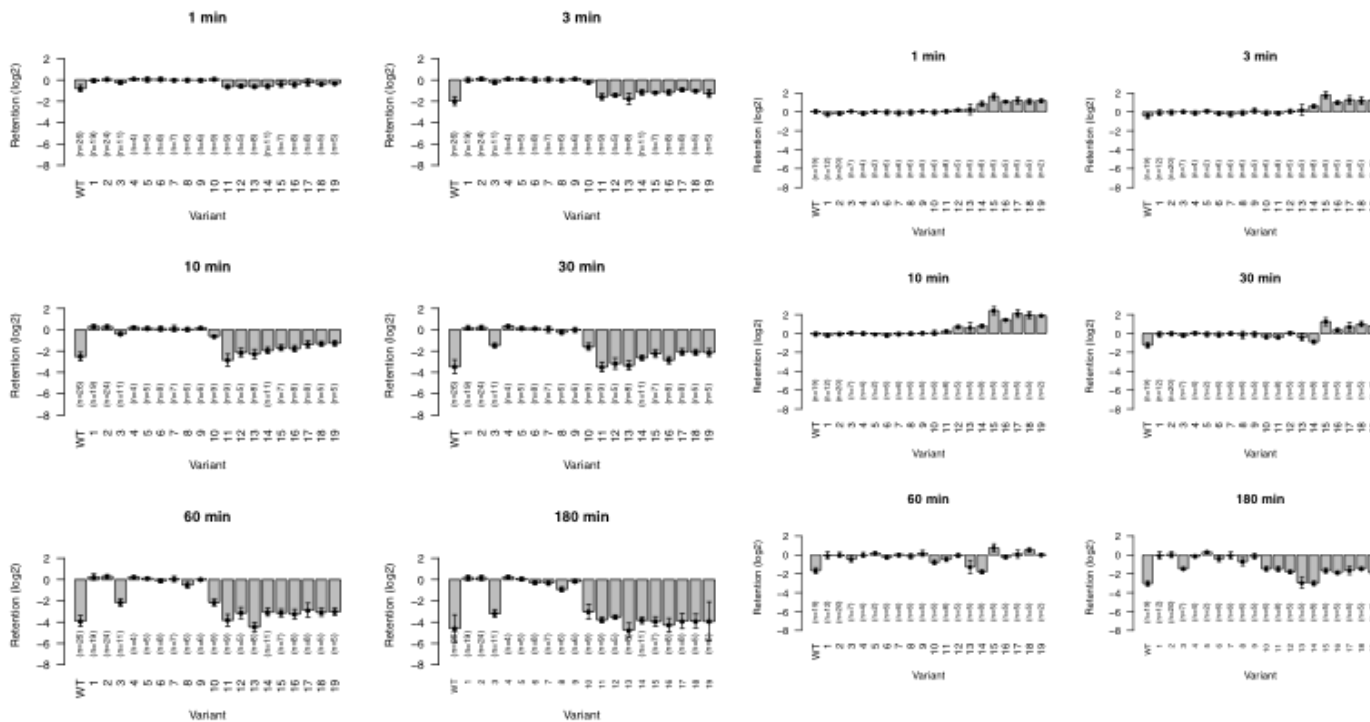

Supplementary Figure 21) Results from FnCpf1 interaction with pooled *EGFP-1* targets. All reactions were done with NEB buffer 3.1 and conditions detailed in “Materials and Methods: High throughput in vitro target specificity assays”. Bar graphs of median retention scores for single-base-deletion variants. Error bars represent the standard deviation of the retentions for distinct sequence tags in the library matching the noted target sequence, with (n) values below each bar representing the total number of independent barcoded tags assessed for each target sequence. Refer to “Materials and Methods” for full conditions and retention calculations.

### FnCpf1 targeting *EGFP-1*

- |                             |                              |
|-----------------------------|------------------------------|
| 1. TTTA_CGGCAAGCTGCCCCGCGCC | 7. TTTACCGGCAAGC_GCCCCGCGCC  |
| 2. TTTACC_GCAAGCTGCCCCGCGCC | 8. TTTACCGGCAAGCT_CCCGCGCC   |
| 3. TTTACCGG_AAGCTGCCCCGCGCC | 9. TTTACCGGCAAGCTGCC_GTGCCC  |
| 4. TTTACCGGC_AGCTGCCCCGCGCC | 10. TTTACCGGCAAGCTGCC_CGCCC  |
| 5. TTTACCGGCAA_CTGCCCCGCGCC | 11. TTTACCGGCAAGCTGCCCG_GCCC |
| 6. TTTACCGGCAAG_TGCCCCGCGCC | 12. TTTACCGGCAAGCTGCCCGT_CCC |

#### Method 1: Linearized library

#### Method 2: Circularized library

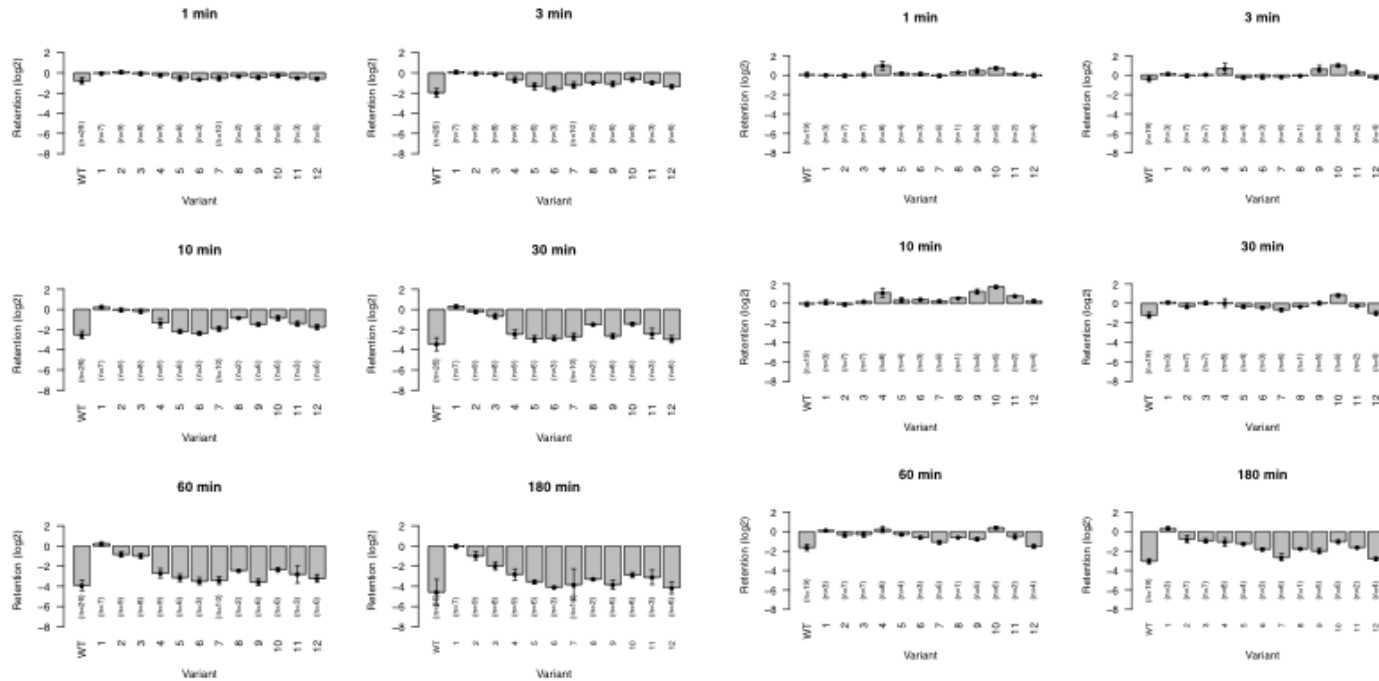

Supplementary Figure 22) Results from FnCpf1 interaction with pooled *EGFP-2* targets. All reactions were done with NEB buffer 3.1 and conditions detailed in “Materials and Methods: High throughput in vitro target specificity assays”. Retention score profiles for whole-library assays with backbone cleavage step used (to avoid preferential recovery of nicked substrates; left panel) or not used (allowing preferential recovery of nicked substrates; right panel) for *EGFP-2* single base transversions. X axis shows the positions, controls, and WT. Y axis shows the retention score. Refer to “Materials and Methods” for full conditions and retention calculations. (Method 1- Linearized library; AF\_SOL\_821, Method 2-Circular library; AF\_SOL\_811; NEB buffer 3.1).

### FnCpf1 single base transversion effects on *EGFP-2* gRNA

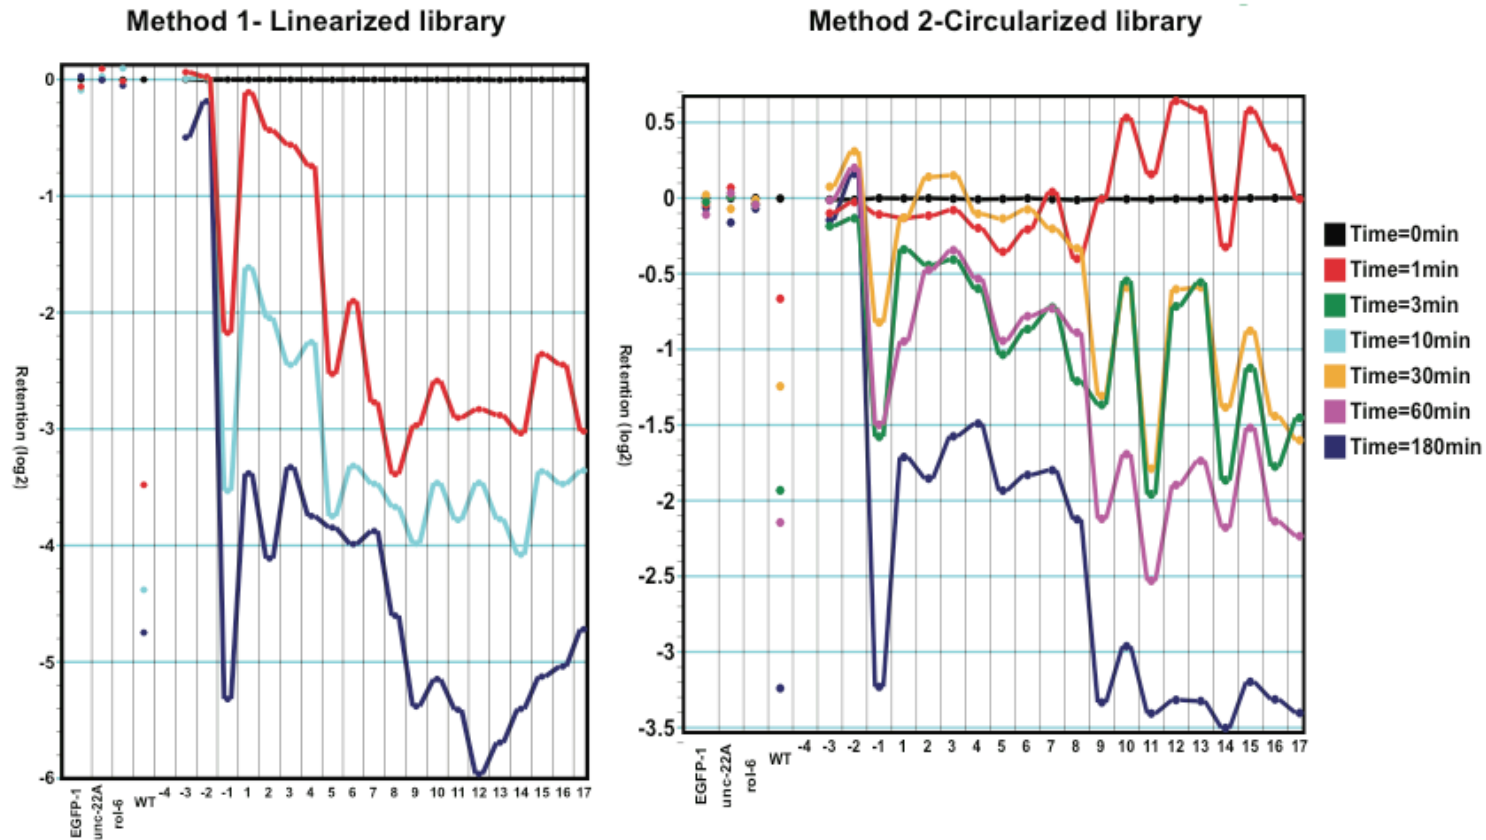



Supplementary Figure 23) Results from FnCpf1 interaction with pooled *EGFP-2* targets. All reactions were done with NEB buffer 3.1 and conditions detailed in “Materials and Methods: High throughput in vitro target specificity assays”. Bar graphs of median retention scores for double consecutive variants. Error bars represent the standard deviation of the retentions for distinct sequence tags in the library matching the noted target sequence, with (n) values below each bar representing the total number of independent barcoded tags assessed for each target sequence. Refer to “Materials and Methods” for full conditions and retention calculations.

### FnCpf1 targeting *EGFP-2*

- |                             |                              |
|-----------------------------|------------------------------|
| 1. TGGGACAAGCAGAAGAACGGCATC | 10. TTTGACAAGCCTAAGAACGGCATC |
| 2. TTGTACAAGCAGAAGAACGGCATC | 11. TTTGACAAGCATCAGAACGGCATC |
| 3. TTTTCCAAGCAGAAGAACGGCATC | 12. TTTGACAAGCAGCCGAACGGCATC |
| 4. TTTGCAAGCAGAAGAACGGCATC  | 13. TTTGACAAGCAGACTAACGGCATC |
| 5. TTTGAACAGCAGAAGAACGGCATC | 14. TTTGACAAGCAGAAACGGCATC   |
| 6. TTTGACCCGCAGAAGAACGGCATC | 15. TTTGACAAGCAGAAGCCGGCATC  |
| 7. TTTGACACTCAGAAGAACGGCATC | 16. TTTGACAAGCAGAAGCAGGCATC  |
| 8. TTTGACAATAAGAAGAACGGCATC | 17. TTTGACAAGCAGAAGAAATGCATC |
| 9. TTTGACAAGACGAAGAACGGCATC | 18. TTTGACAAGCAGAAGAACTTCATC |
|                             | 19. TTTGACAAGCAGAAGAACGTAATC |

#### Method 1: Linearized library

#### Method 2: Circularized library

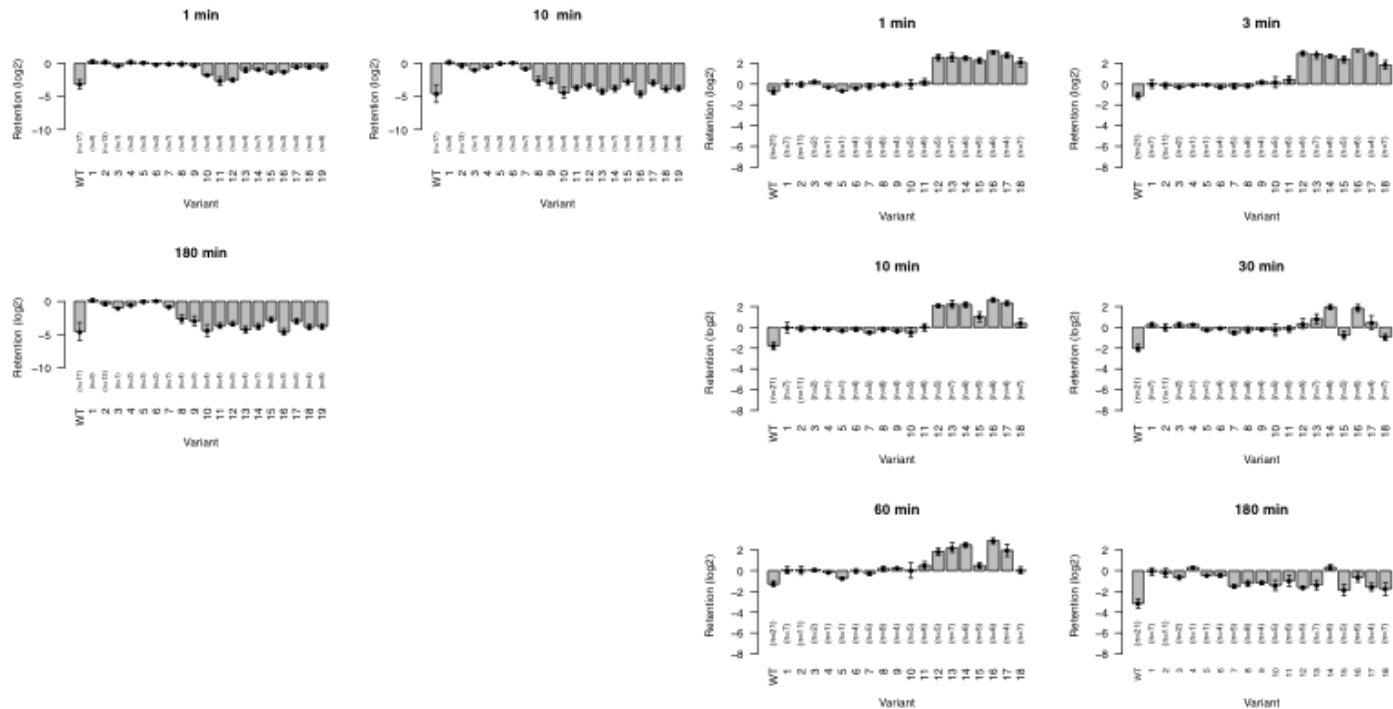



Supplementary Figure 24) Results from FnCpf1 interaction with pooled *EGFP-2* targets. All reactions were done with NEB buffer 3.1 and conditions detailed in “Materials and Methods: High throughput in vitro target specificity assays”. Bar graphs of median retention scores for single-base-deletion variants. Error bars represent the standard deviation of the retentions for distinct sequence tags in the library matching the noted target sequence, with (n) values below each bar representing the total number of independent barcoded tags assessed for each target sequence. Refer to “Materials and Methods” for full conditions and retention calculations.

### FnCpf1 targeting EGFP-2

- |                              |                               |
|------------------------------|-------------------------------|
| 1. TTTG_CAAGCAGAAGAACGGGCATC | 8. TTTGACAAGCAGA_GAACGGGCATC  |
| 2. TTTGA_AAGCAGAAGAACGGGCATC | 9. TTTGACAAGCAGAAA_ACGGCATC   |
| 3. TTTGACA_GCAGAAGAACGGGCATC | 10. TTTGACAAGCAGAAGA_CGGGCATC |
| 4. TTTGACAA_CAGAAGAACGGGCATC | 11. TTTGACAAGCAGAAGAA_GGCATC  |
| 5. TTTGACAAG_AGAAGAACGGGCATC | 12. TTTGACAAGCAGAAGAAC_GCATC  |
| 6. TTTGACAAGC_GAAGAACGGGCATC | 13. TTTGACAAGCAGAAGAACGG_ATC  |
| 7. TTTGACAAGCA_AAGAACGGGCATC | 14. TTTGACAAGCAGAAGAACGGCA_C  |

#### Method 1: Linearized library

#### Method 2: Circularized library

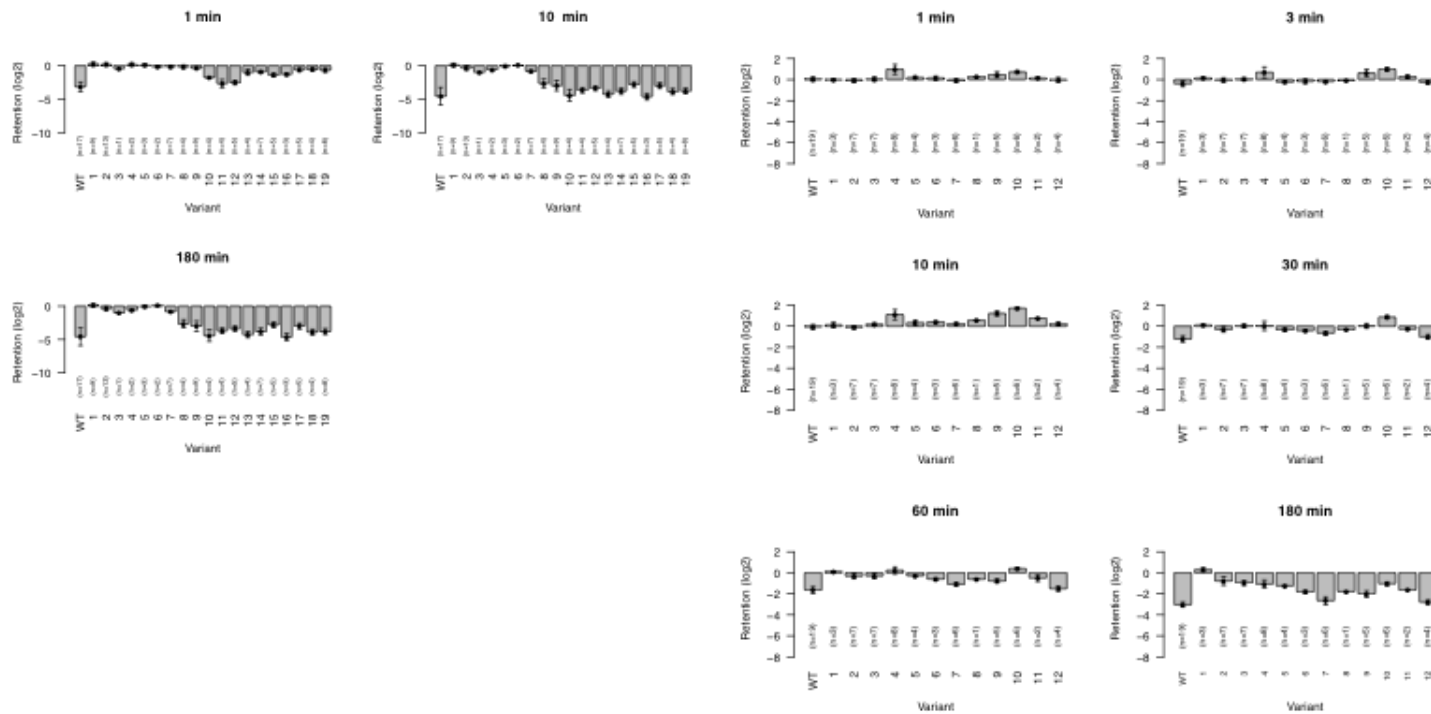

Supplementary Figure 25) Results from FnCpf1 interaction with pooled *rol-6* targets. All reactions were done with NEB buffer 3.1 and conditions detailed in “Materials and Methods: High throughput in vitro target specificity assays”. Retention score profiles for whole-library assays with backbone cleavage step used (to avoid preferential recovery of nicked substrates; left panel) or not used (allowing preferential recovery of nicked substrates; right panel) for *rol-6* single base transversions. X axis shows the positions, controls, and WT. Y axis shows the retention score. Refer to “Materials and Methods” for full conditions and retention calculations.

### FnCpf1 single base transversion effects on *rol-6* gRNA

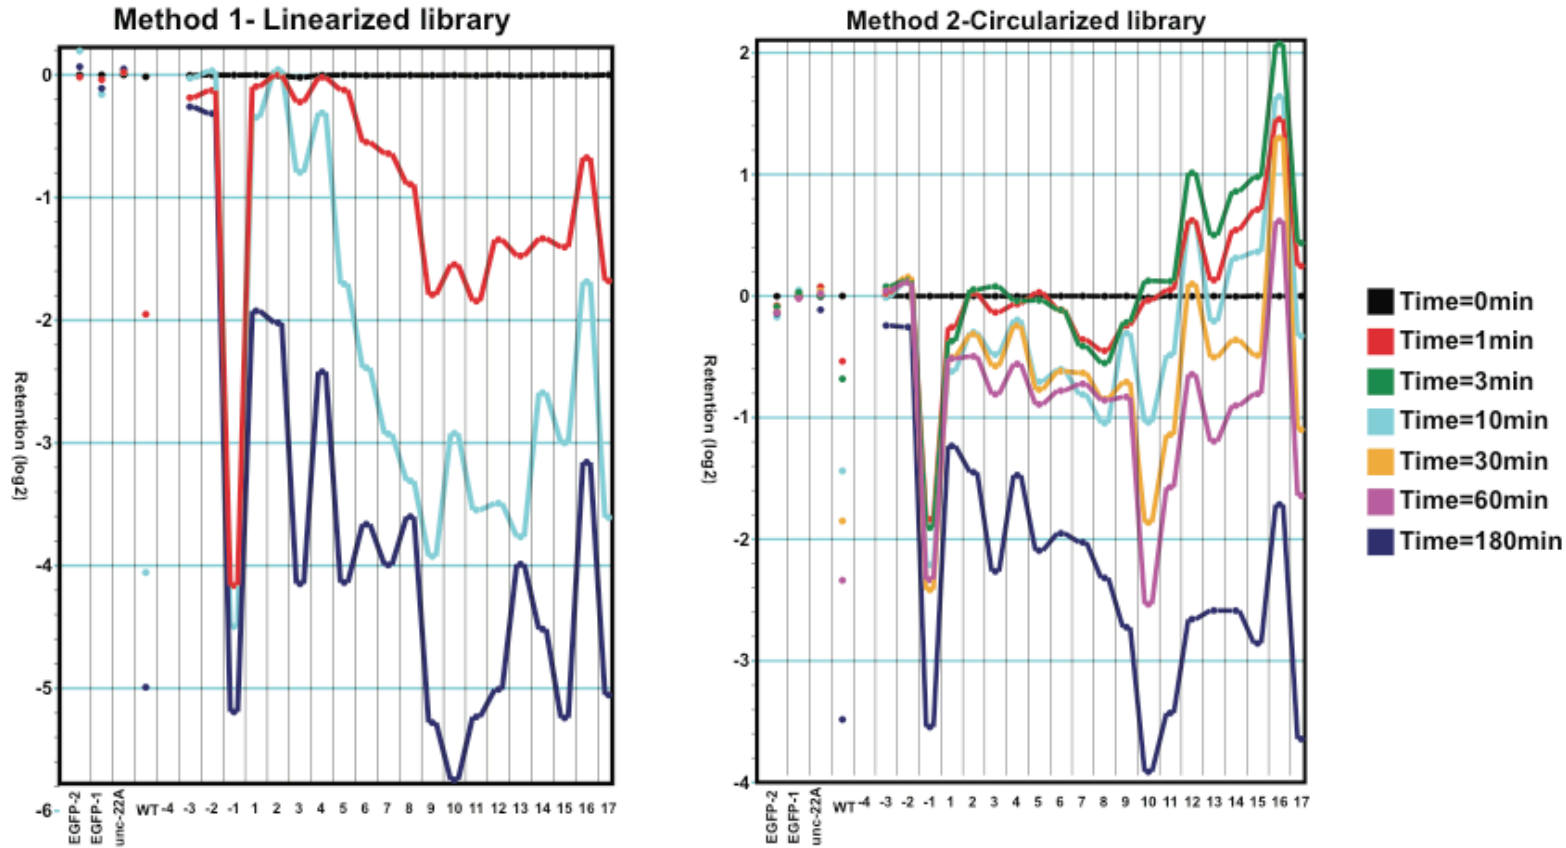

Supplementary Figure 26) Results from FnCpf1 interaction with pooled *rol-6* targets. All reactions were done with NEB buffer 3.1 and conditions detailed in “Materials and Methods: High throughput in vitro target specificity assays”. Bar graphs of median retention scores for double consecutive variants. Error bars represent the standard deviation of the retentions for distinct sequence tags in the library matching the noted target sequence, with (n) values below each bar representing the total number of independent barcoded tags assessed for each target sequence. Refer to “Materials and Methods” for full conditions and retention calculations.

### FnCpf1 targeting *rol-6*

- |                             |                              |
|-----------------------------|------------------------------|
| 1. TGGTCCATATTGTTGACGTCTCAC | 11. TTTTCCATATTGTGACGTCTCAC  |
| 2. TTGGCCATATTGTTGACGTCTCAC | 12. FTTTCCATATTGGGACGTCTCAC  |
| 3. TTTGACATATGTTGACGTCTCAC  | 13. FTTTCCATATTGTTGACGTCTCAC |
| 4. TTTTAAATATTGTTGACGTCTCAC | 14. TTTTCCATATTGTTCCGTCCTCAC |
| 5. TTTTCACTATTGTTGACGTCTCAC | 15. FTTTCCATATTGTTGACGTCTCAC |
| 6. TTTTCCCGATTGTTGACGTCTCAC | 16. FTTTCCATATTGTTGAATCTCAC  |
| 7. TTTTCCAGCTTGTGACGTCTCAC  | 17. TTTTCCATATTGTTGACGTCTCAC |
| 8. TTTTCCATCGTGTGACGTCTCAC  | 18. FTTTCCATATTGTTGACGGATCAC |
| 9. TTTTCCATAGGGTTGACGTCTCAC | 19. FTTTCCATATTGTTGACGTAGCAC |
| 10. TTTTCCATATGTTGACGTCTCAC |                              |

#### Method 1: Linearized library

#### Method 2: Circularized library

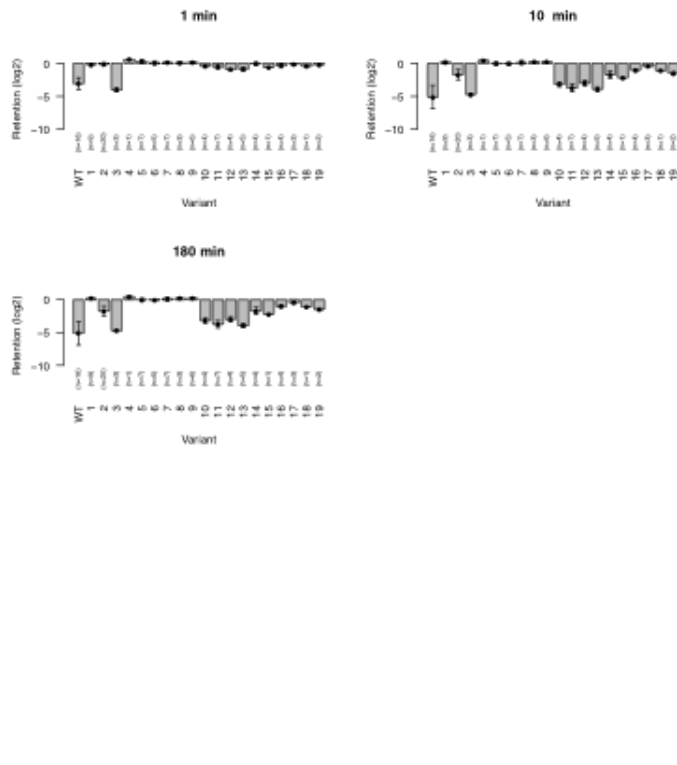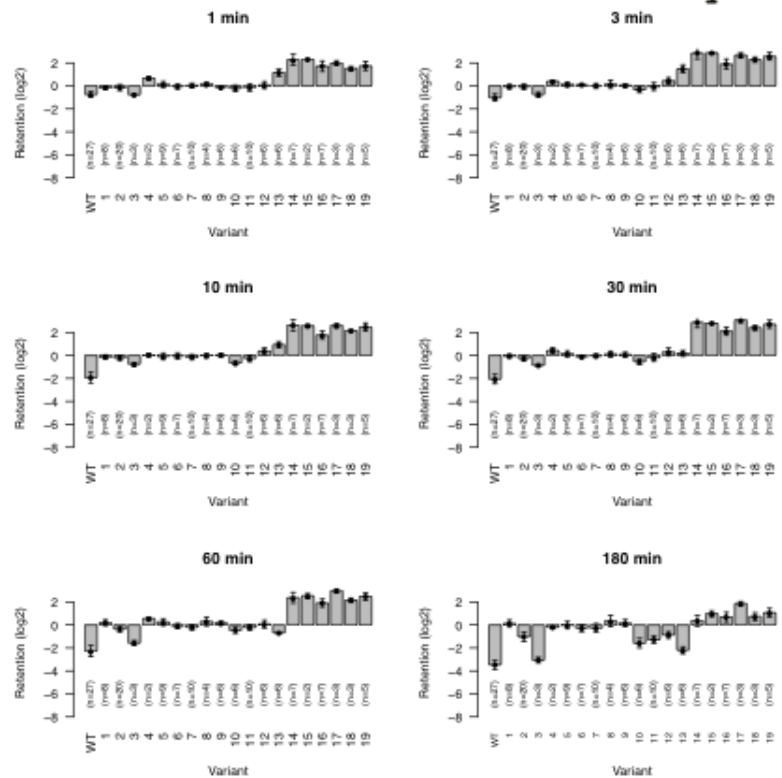

Supplementary Figure 27) Results from FnCpf1 interaction with pooled *rol-6* targets. All reactions were done with NEB buffer 3.1 and conditions detailed in “Materials and Methods: High throughput in vitro target specificity assays”. Bar graphs of median retention scores for single-base-deletion variants. Error bars represent the standard deviation of the retentions for distinct sequence tags in the library matching the noted target sequence, with (n) values below each bar representing the total number of independent barcoded tags assessed for each target sequence. Refer to “Materials and Methods” for full conditions and retention calculations.

### FnCpf1 targeting *rol-6*

- |                             |                              |
|-----------------------------|------------------------------|
| 1. TTTT_CATATTGTTGACGTCTCAC | 8. TTTTCCATATTGTT_ACGTCTCAC  |
| 2. TTTTCC_TATTGTTGACGTCTCAC | 9. TTTTCCATATTGTTG_CGTCTCAC  |
| 3. TTTTCCA_ATTGTTGACGTCTCAC | 10. TTTTCCATATTGTTGA_GTCTCAC |
| 4. TTTTCCAT_TTGTTGACGTCTCAC | 11. TTTTCCATATTGTTGAC_TCTCAC |
| 5. TTTTCCATAT_GTTGACGTCTCAC | 12. TTTTCCATATTGTTGACG_CTCAC |
| 6. TTTTCCATATT_TTGACGTCTCAC | 13. TTTTCCATATTGTTGACGT_TCAC |
| 7. TTTTCCATATTGT_GACGTCTCAC | 14. TTTTCCATATTGTTGACGTC_CAC |

#### Method 1: Linearized library

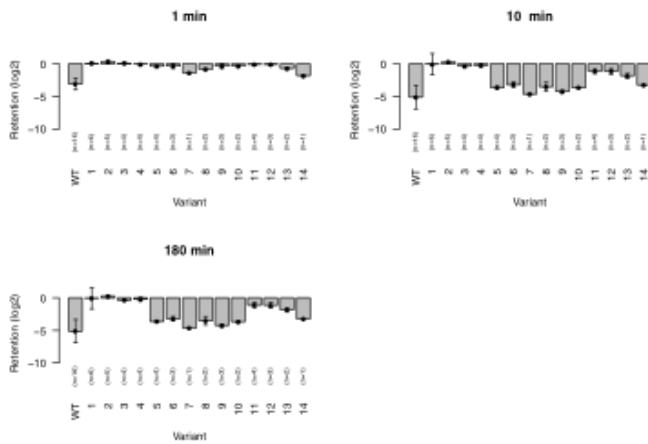

#### Method 2: Circularized library

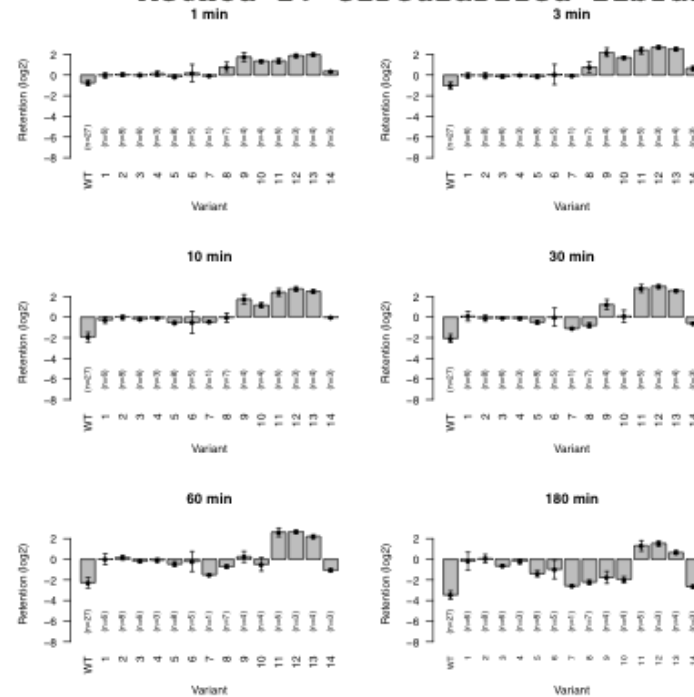

Supplementary Figure 28) AsCpf1 nicking assessments using agarose gel electrophoresis. AsCpf1 nicking assessments on individual circular plasmid targets, assessed using agarose gel electrophoresis in the presence of Ethidium Bromide intercalator. All experiments done with 50 ng of enzyme with 1:1 concentration of gRNA:protein and at least 100 ng of target plasmid DNA (supercoiled) in NEB buffer 3.1 at 37°C. Ethidium bromide staining of DNA allows visualization of electrophoretic mobility, with a 1kb ladder (left on each gel) used to determine relative mobility of linearized fragments as a function of size. Inferred mobilities of nicked, linear, and supercoiled target plasmids are indicated with arrows at the right of each gel. Sequences shown are of the target-homologous region of each plasmid and of the corresponding guide homology segment. All nicking experiments were done at least twice with similar results

|                     |      |      |      |      |      |      |      |
|---------------------|------|------|------|------|------|------|------|
| <b>Time (secs):</b> | 30   | 60   | 180  | 600  | -    | 600  | 600  |
| <b>Guide:</b>       | g1   | g1   | g1   | g1   | -    | -    | r6   |
| <b>Cpf1:</b>        | As   | As   | As   | As   | -    | -    | As   |
| <b>EcoRV:</b>       | -    | -    | -    | -    | -    | +    | +    |
| <b>Plasmid:</b>     | p705 |

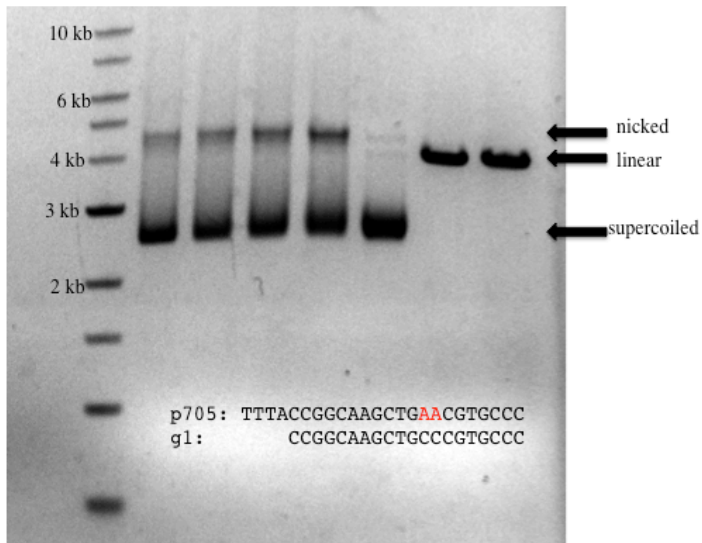

p703: TTTACCGGCAAGCTGCC**A**TGCCC  
p648: TTTACCGGCAAGCTGCCCGTGCCC  
g1: CCGGCAAGCTGCCCGTGCCC

|                     |      |      |      |      |      |      |      |      |      |      |      |      |
|---------------------|------|------|------|------|------|------|------|------|------|------|------|------|
| <b>Time (secs):</b> | 30   | 60   | 180  | 600  | 600  | 600  | 30   | 60   | 180  | 600  | 600  | 600  |
| <b>Guide:</b>       | g1   | g1   | g1   | g1   | -    | -    | g1   | g1   | g1   | g1   | -    | -    |
| <b>Cpf1:</b>        | As   | As   | As   | As   | -    | -    | As   | As   | As   | As   | -    | -    |
| <b>EcoRV:</b>       | -    | -    | -    | -    | -    | +    | -    | -    | -    | -    | -    | +    |
| <b>Plasmid:</b>     | p648 | p648 | p648 | p648 | p648 | p648 | p703 | p703 | p703 | p703 | p703 | p703 |

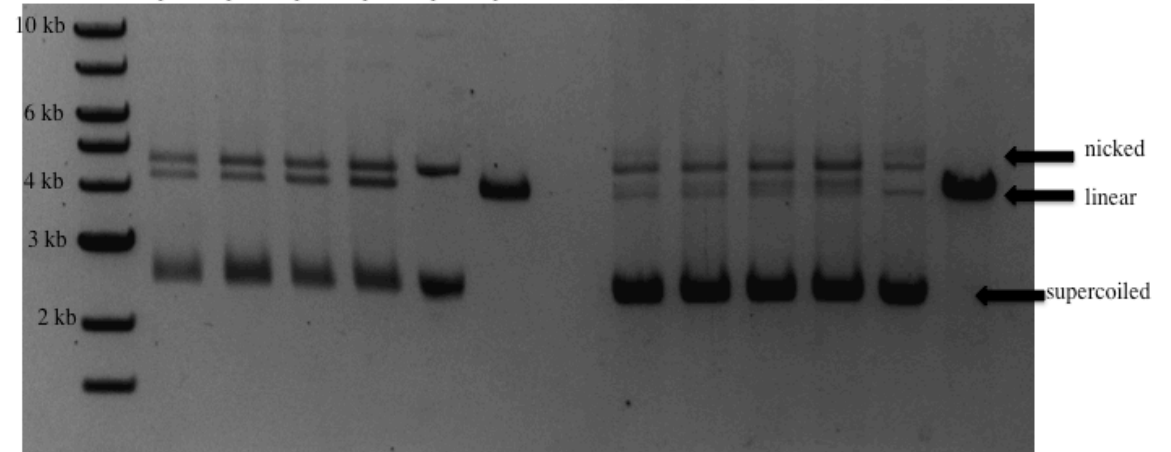

Supplementary Figure 29) FnCpf1 assessments using agarose gel electrophoresis. FnCpf1 nicking assessments on individual circular plasmid targets, assessed using agarose gel electrophoresis in the presence of Ethidium Bromide intercalator. All experiments done with 50 ng of enzyme with 1:1 concentration of gRNA:protein and at least 100 ng of target plasmid DNA (supercoiled) in NEB buffer 3.1 at 37°C. Ethidium bromide staining of DNA allows visualization of electrophoretic mobility, with a 1kb ladder (left on each gel) used to determine relative mobility of linearized fragments as a function of size. Inferred mobilities of nicked, linear, and supercoiled target plasmids are indicated with arrows at the right of each gel. Sequences shown are of the target-homologous region of each plasmid and of the corresponding guide homology segment. All nicking experiments were done at least twice with similar results

|                     |      |      |      |      |      |      |
|---------------------|------|------|------|------|------|------|
| <b>Time (secs):</b> | 30   | 60   | 180  | 600  | -    | 600  |
| <b>Guide:</b>       | g1   | g1   | g1   | g1   | -    | -    |
| <b>Cpf1:</b>        | Fn   | Fn   | Fn   | Fn   | -    | -    |
| <b>EcoRV:</b>       | -    | -    | -    | -    | -    | +    |
| <b>Plasmid:</b>     | p705 | p705 | p705 | p705 | p705 | p705 |

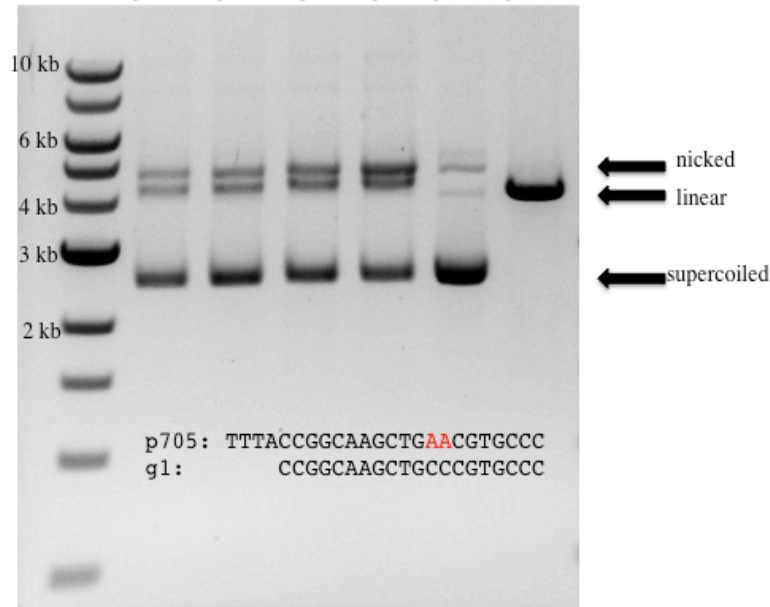

p703: TTTACCGCAAGCTGCCATTGCCC  
p648: TTTACCGCAAGCTGCCCGTGCCC  
g1: CCGCAAGCTGCCCGTGCCC

|                     |      |      |      |      |      |      |      |      |      |      |      |      |
|---------------------|------|------|------|------|------|------|------|------|------|------|------|------|
| <b>Time (secs):</b> | 30   | 60   | 180  | 600  | -    | 600  | 30   | 60   | 180  | 600  | -    | 600  |
| <b>Guide:</b>       | g1   | g1   | g1   | g1   | -    | -    | g1   | g1   | g1   | g1   | -    | -    |
| <b>Cpf1:</b>        | Fn   | Fn   | Fn   | Fn   | -    | -    | Fn   | Fn   | Fn   | Fn   | -    | -    |
| <b>EcoRV:</b>       | -    | -    | -    | -    | -    | +    | -    | -    | -    | -    | -    | +    |
| <b>Plasmid:</b>     | p648 | p648 | p648 | p648 | p648 | p648 | p703 | p703 | p703 | p703 | p703 | p703 |

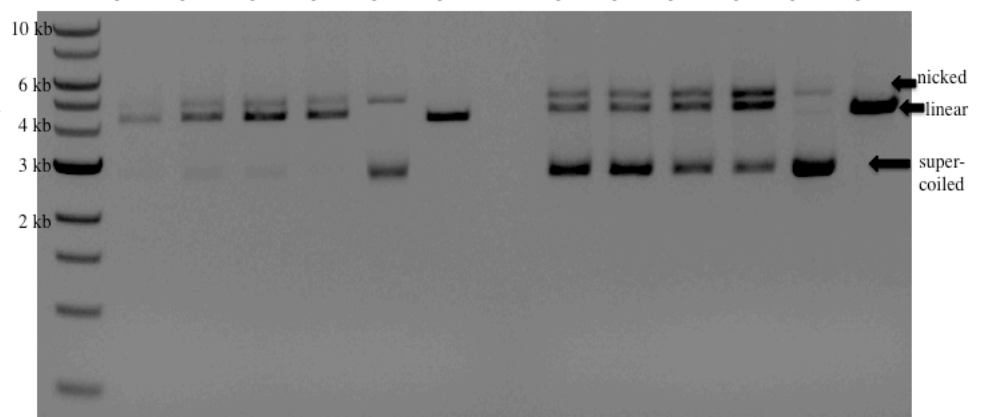



Supplementary Figure 30) LbCpf1 agarose gel nicking assessment with equivalent mismatches in EGFP-1 gRNA paired with WT EGFP-1 target. LbCpf1 nicking assessments on individual circular plasmid targets, assessed using agarose gel electrophoresis in the presence of Ethidium Bromide intercalator. All experiments done with 50 ng of enzyme with 1:1 concentration of gRNA:protein and at least 100 ng of target plasmid DNA (supercoiled) in NEB buffer 3.1 at 37°C. Ethidium bromide staining of DNA allows visualization of electrophoretic mobility, with a 1 kb ladder (left on each gel) used to determine relative mobility of linearized fragments as a function of size. Inferred mobilities of nicked, linear, and supercoiled target plasmids are indicated with arrows at the right of each gel. Sequences shown are of the target-homologous region of each plasmid and of the corresponding guide homology segment. All nicking experiments were done at least twice with similar results

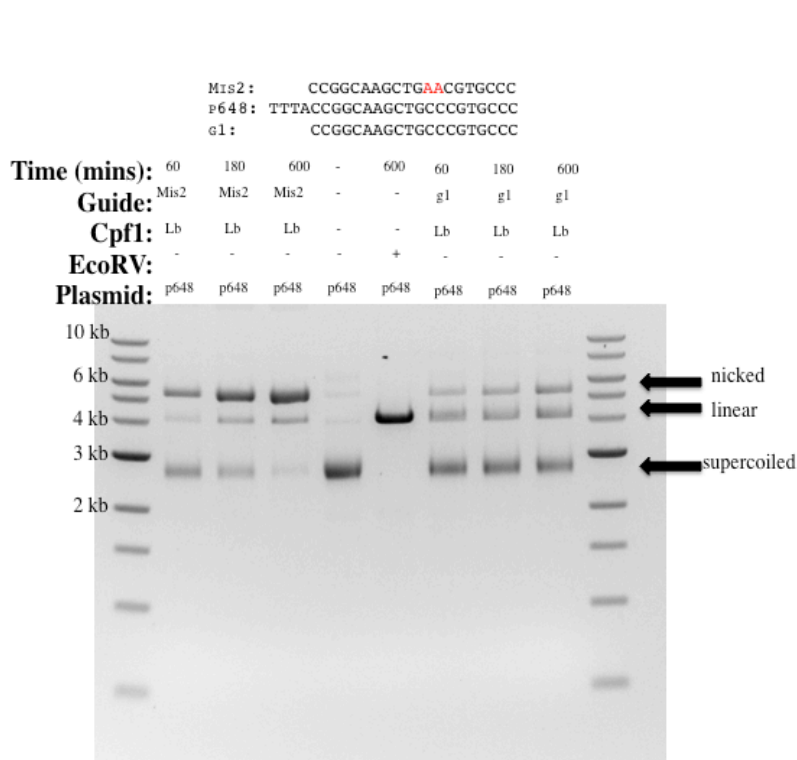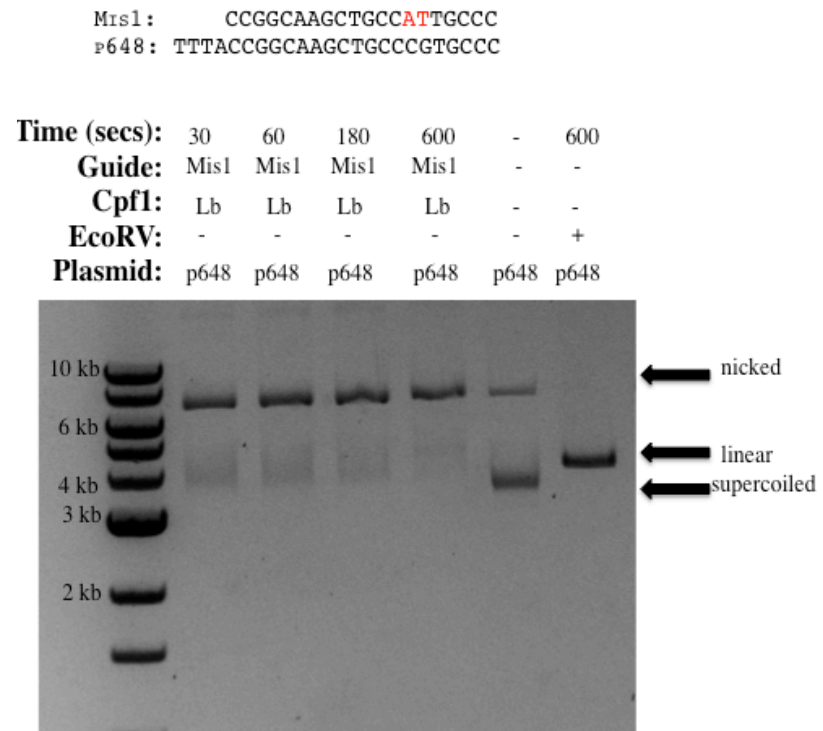

Supplementary Figure 31) Analysis of Cpf1 activities on additional target sequences. A series of additional gRNA/target combinations were tested using individual agarose gel migration assays. These were targets where no high throughput data was available. Instead, we used general rules from *unc-22A*, EGFP-1, and *rol-6* to design potential nicking guides. Sequences of guide homology regions and targets were as shown in figure. All nicking gel experiments were done at least twice with similar results. LbCpf1 agarose gel nicking assays for DNMT1 targets with NEB buffer 2.1 and 3.1 incubated at 37°C.

```

dm22085(dmnt1): TTTCCCTTCAGCTAAAATAA
p802:          TTTATTTCCCTTCAGAGAAAATAA
p814:          TTTATTTCCCTTCAGCTAAAATAA
  
```

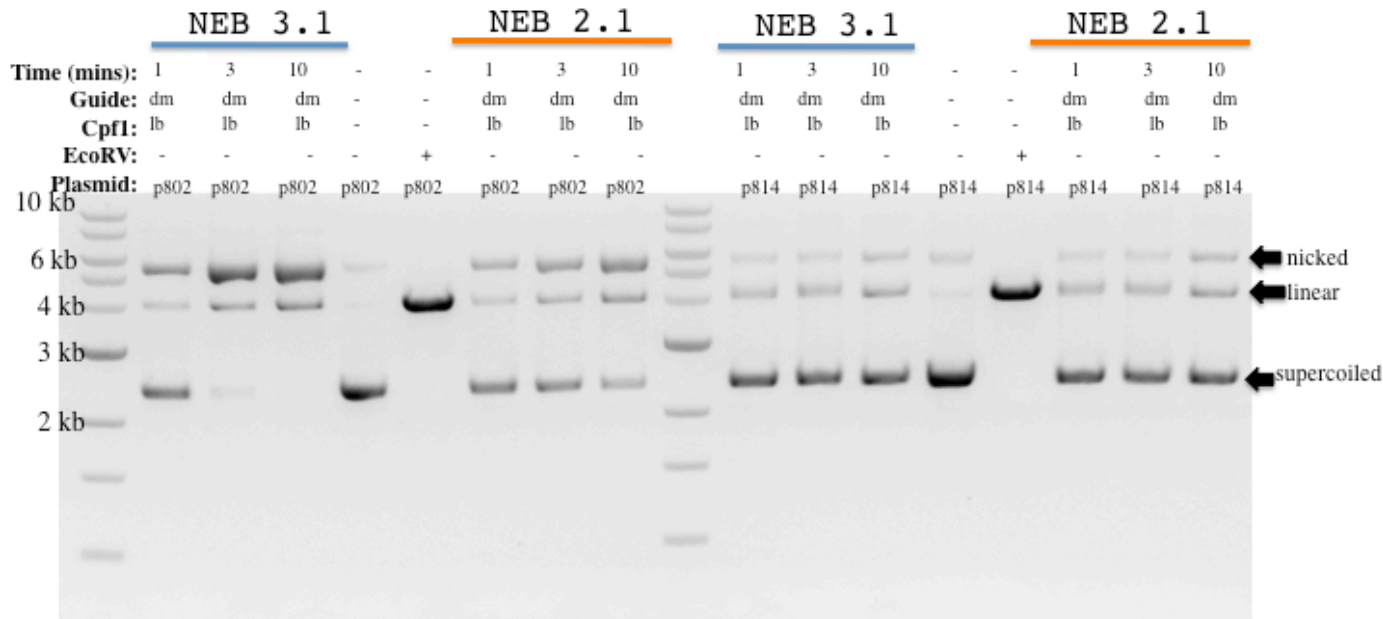



Supplementary Figure 32) LbCpf1 agarose gel nicking assays for WTAP exon8 targets with NEB buffer 2.1 and 3.1 incubated at 37°C. Analysis of Cpf1 activities on additional target sequences. A series of additional gRNA/target combinations were tested using individual agarose gel migration assays. These were targets where no high throughput data was available. Instead, we used general rules from *unc-22A*, *EGFP-1*, and *rol-6* to design potential nicking guides. Sequences of guide homology regions and targets were as shown in figure. All nicking gel experiments were done at least twice with similar results.

wp1058 (wtap): CCACTCACTGCTTTCTCCTC  
 p798: TTTCCCACTCACTGCGGTCTCCTC  
 p810: TTTCCCACTCACTGCTTTCTCCTC

wp1058 (wtap): CCACTCACTGCTTTCTCCTC  
 p798: TTTCCCACTCACTGCGGTCTCCTC  
 p810: TTTCCCACTCACTGCTTTCTCCTC

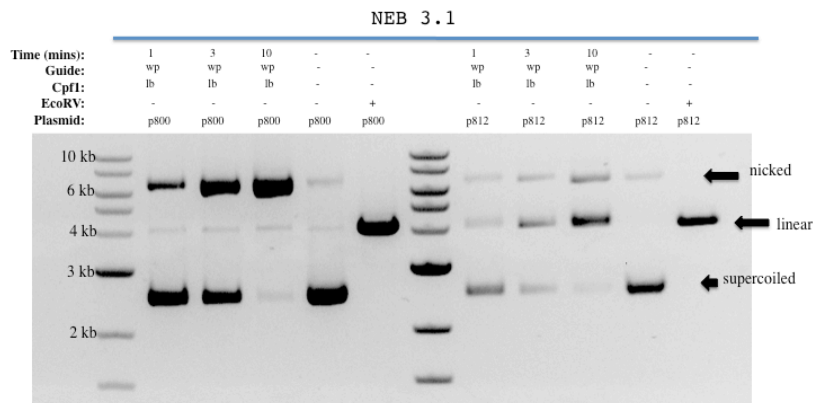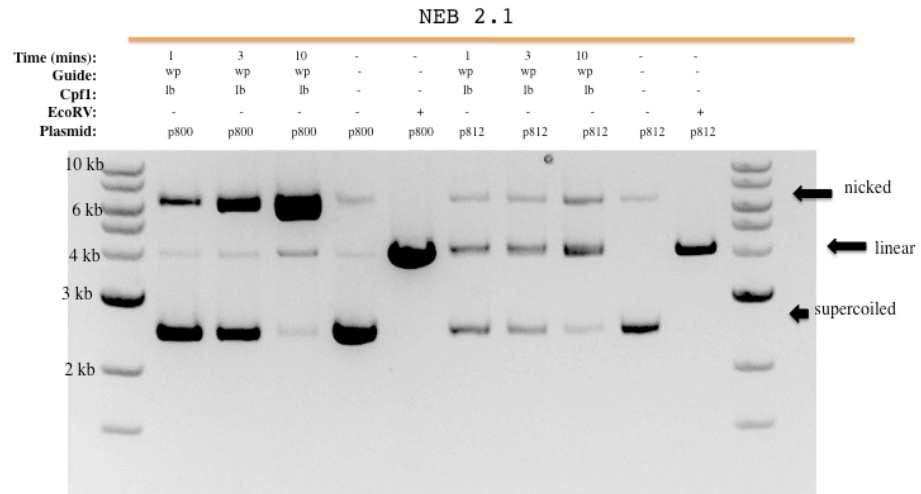

Supplementary Figure 33) LbCpf1 agarose gel nicking assays for *Fancf* targets with NEB buffer 2.1 incubated at 37°C. Analysis of Cpf1 activities on additional target sequences. A series of additional gRNA/target combinations were tested using individual agarose gel migration assays. These were targets where no high throughput data was available. Instead, we used general rules from *unc-22A*, *EGFP-1*, and *rol-6* to design potential nicking guides. Sequences of guide homology regions and targets were as shown in figure. All nicking gel experiments were done at least twice with similar results.

```

fc596(fancf): GTCGGCATGGCCCCATTTCG
p800:      TTTGGTCGGCATGGCAACATTTCG
p812:      TTTGGTCGGCATGGCCCCATTTCG
  
```

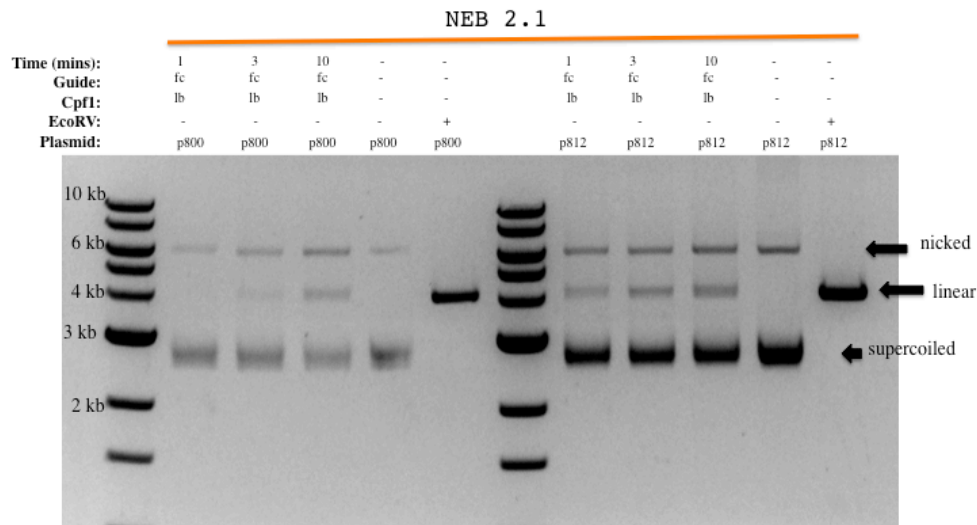

Supplementary Figure 34) Results from Cas9 interaction with pooled *EGFP-1* targets. All reactions were done with thermobuffer and conditions detailed in “Materials and Methods: High throughput in vitro target specificity assays”. Cas9 high throughput nicking assay with Type II libraries for EGFP-1 (Method 2-Circular Library; AF\_SOL\_854). Retention scores are shown for whole-library assays with backbone cleavage step used to avoid preferential recovery of nicked substrates for EGFP-1 target single base transversions. X axis shows the positions, controls, and wild type retention (WT—full target match), negative controls (no target match) and individual transversions through the full sequence. Y axis shows the retention score. Refer to “Materials and Methods” for full conditions and retention calculations.

Single base transversion effects on EGFP-1 target

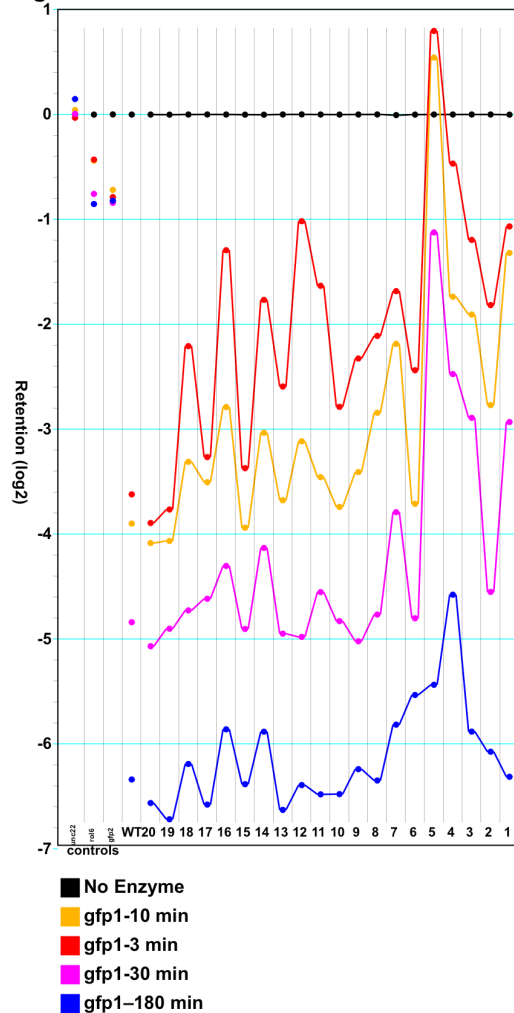

Supplementary Figure 35) Results from Cas9 interaction with pooled *EGFP-1* targets. All reactions were done with thermobuffer and conditions detailed in “Materials and Methods: High throughput in vitro target specificity assays”. Cas9 high throughput nicking assay with Type II libraries for EGFP-1 (Method 2-Circular Library; AF\_SOL\_854). Bar graphs of median retention scores for double consecutive variants. Error bars represent the standard deviation of the retentions for distinct sequence tags in the library matching the noted target sequence, with (n) values below each bar representing the total number of independent barcoded tags assessed for each target sequence. Refer to “Materials and Methods” for full conditions and retention calculations.

EGFP-1 Target Sequences

1. GGGCACGGGCAGCTTGCC**C**CTGG
2. GGGCACGGGCAGCTTG**GG**GTGG
3. GGGCACGGGCAGCT**A**CCGGTGG
4. GGGCACGGGCAG**G**ATGCCGGTGG
5. GGGCACGGGC**T**CCTTGCCGGTGG
6. GGGCAC**CCG**CAGCTTGCCGGTGG
7. GGGCAC**GG**CAGCTTGCCGGTGG
8. GGG**TG**GGGCAGCTTGCCGGTGG

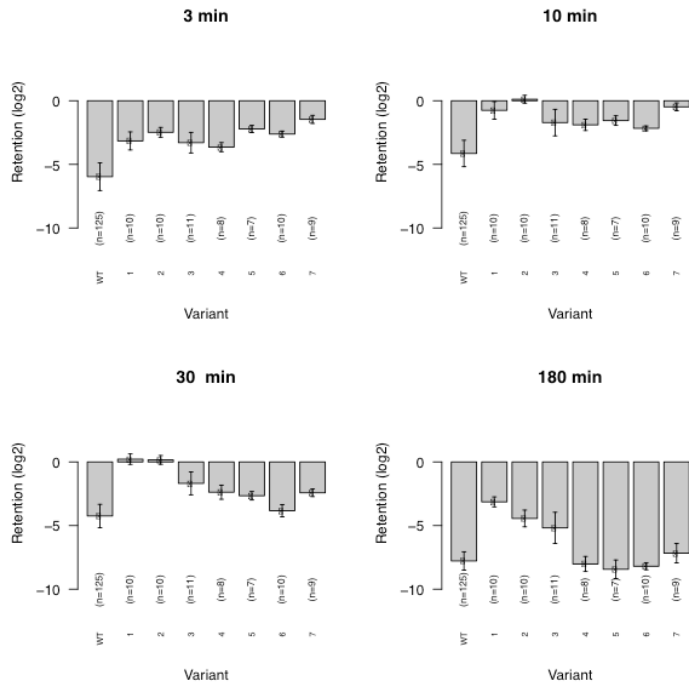

Supplementary Figure 36) Results from Cas9 interaction with pooled *EGFP-1* targets. All reactions were done with thermobuffer and conditions detailed in “Materials and Methods: High throughput in vitro target specificity assays”. Cas9 high throughput nicking assay with Type II libraries for EGFP-1 (Method 2-Circular Library; AF\_SOL\_854). Bar graphs of median retention scores for single deletion variants. Error bars represent the standard deviation of the retentions for distinct sequence tags in the library matching the noted target sequence, with (n) values below each bar representing the total number of independent barcoded tags assessed for each target sequence. Refer to “Materials and Methods” for full conditions and retention calculations.

### EGFP-1 Target Sequences

1. GG\_CACGGGCAGCTTGCCGTTGG
2. GGG\_ACGGGCAGCTTGCCGTTGG
3. GGGC\_CGGGCAGCTTGCCGTTGG
4. GGGCA\_GGGCAGCTTGCCGTTGG
5. GGGCAC\_GGCAGCTTGCCGTTGG
6. GGGCACGGG\_AGCTTGCCGTTGG
7. GGGCACGGGC\_GCTTGCCGTTGG
8. GGGCACGGGCA\_CTTGCCGTTGG
9. GGGCACGGGCAG\_TTGCCGTTGG
10. GGGCACGGGCAGC\_TGCCGTTGG
11. GGGCACGGGCAGCTT\_CCGTTGG
12. GGGCACGGGCAGCTTG\_CGTTGG
13. GGGCACGGGCAGCTTGCC\_GTGG

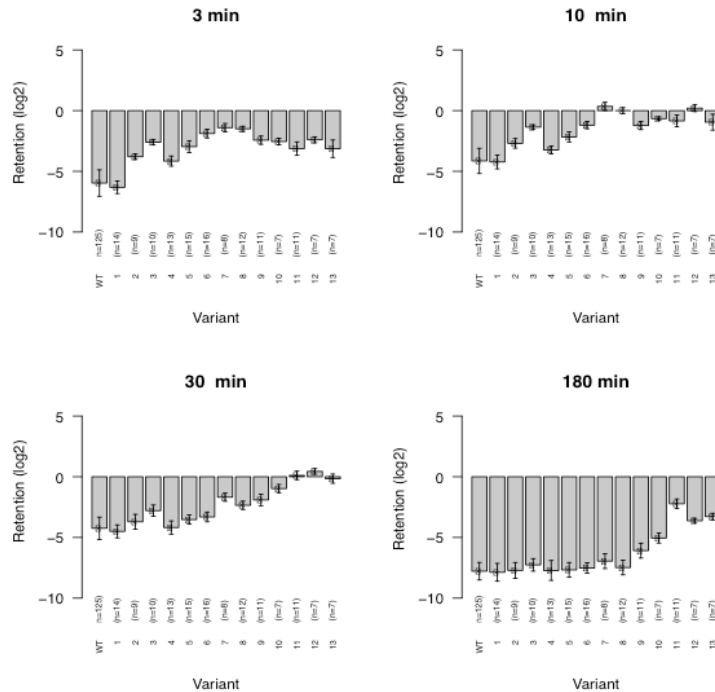

Supplementary Figure 37) Results from Cas9 interaction with pooled *EGFP-2* targets. All reactions were done with thermobuffer and conditions detailed in “Materials and Methods: High throughput in vitro target specificity assays”. Cas9 high throughput nicking assay with Type II libraries for EGFP-2 (Method 2-Circular Library; AF\_SOL\_854). Retention scores are shown for whole-library assays with backbone cleavage step used to avoid preferential recovery of nicked substrates for EGFP-2 target single base transversions. X axis shows the positions, controls, and wild type retention (WT—full target match), negative controls (no target match) and individual transversions through the full sequence. Y axis shows the retention score. Refer to “Materials and Methods” for full conditions and retention calculations.

Single base transversion effects on EGFP-2 target

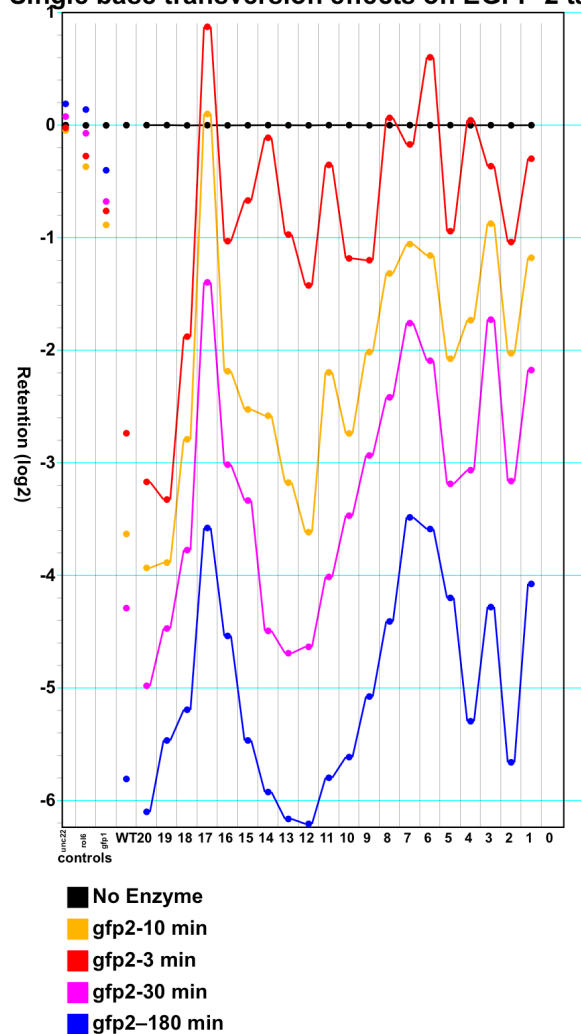

Supplementary Figure 38) Results from Cas9 interaction with pooled *EGFP-2* targets. All reactions were done with thermobuffer and conditions detailed in “Materials and Methods: High throughput in vitro target specificity assays”. Cas9 high throughput nicking assay with Type II libraries for EGFP-2 (Method 2-Circular Library; AF\_SOL\_854). Bar graphs of median retention scores for double consecutive variants. Error bars represent the standard deviation of the retentions for distinct sequence tags in the library matching the noted target sequence, with (n) values below each bar representing the total number of independent barcoded tags assessed for each target sequence. Refer to “Materials and Methods” for full conditions and retention calculations.

EGFP-2 Target Sequences

1. GATGGGGTTCTTCTGCTTGTCCG
2. GATGCCCATCTTCTGCTTGTCCG
3. GATGCCGTAGTTCTGCTTGTCCG
4. GATGCCGTTCAACTGCTTGTCCG
5. GATGCCGTTCTTGAAGCTTGTCCG
6. GATGCCGTTCTTCTCGTTGTCCG
7. GATGCCGTTCTTCTGCAAGTCCG
8. GATGCCGTTCTTCTGCTTACCG

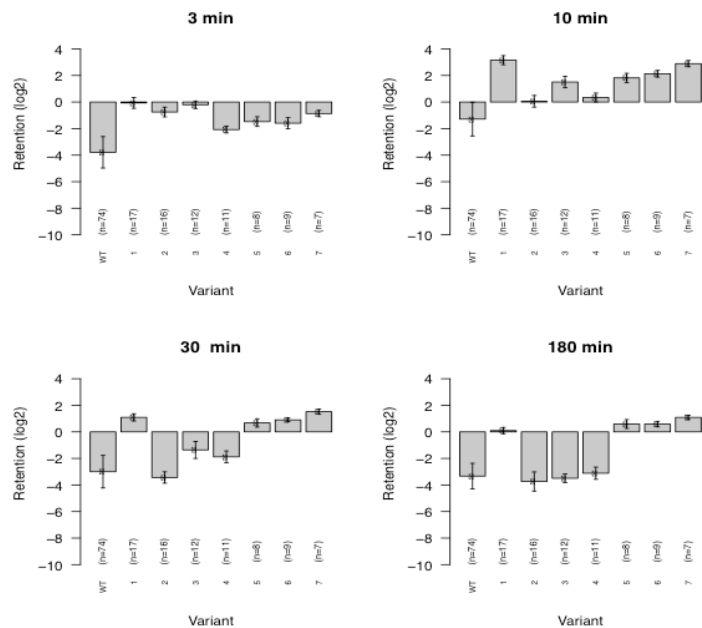

Supplementary Figure 39) Results from Cas9 interaction with pooled *EGFP-2* targets. All reactions were done with thermobuffer and conditions detailed in “Materials and Methods: High throughput in vitro target specificity assays”. Cas9 high throughput nicking assay with Type II libraries for EGFP-2 (Method 2-Circular Library; AF\_SOL\_854). Bar graphs of median retention scores for single deletion variants. Error bars represent the standard deviation of the retentions for distinct sequence tags in the library matching the noted target sequence, with (n) values below each bar representing the total number of independent barcoded tags assessed for each target sequence. Refer to “Materials and Methods” for full conditions and retention calculations.

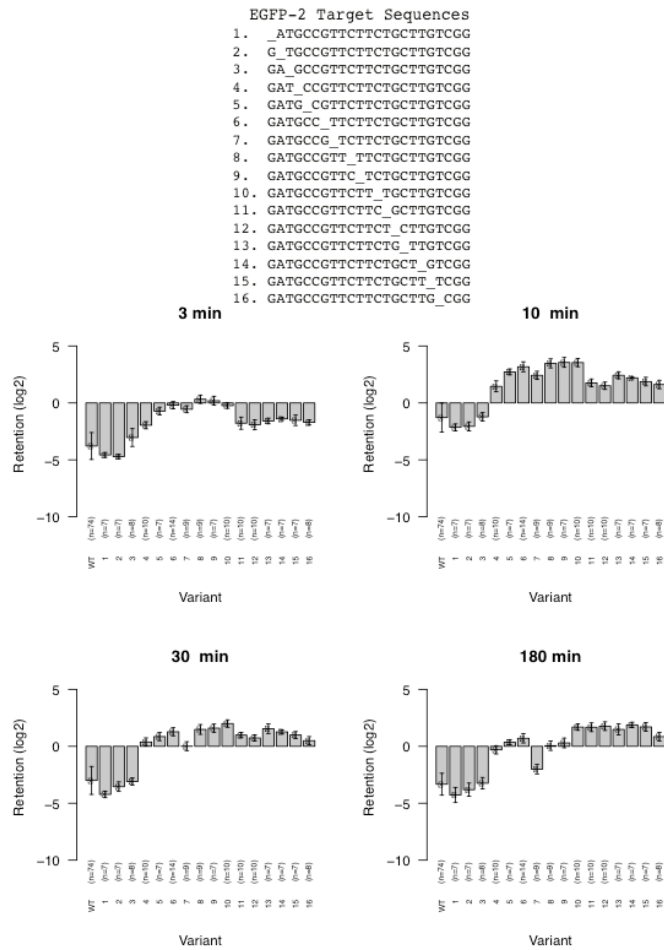



Supplementary Figure 40) Results from Cas9 interaction with pooled *rol-6* targets. All reactions were done with thermobuffer and conditions detailed in “Materials and Methods: High throughput in vitro target specificity assays”. Cas9 high throughput nicking assay with Type II libraries for *rol-6*. (Method 2-Circular Library; AF\_SOL\_854). Retention scores are shown for whole-library assays with backbone cleavage step used to avoid preferential recovery of nicked substrates for *rol-6* target single base transversions. X axis shows the positions, controls, and wild type retention (WT—full target match), negative controls (no target match) and individual transversions through the full sequence. Y axis shows the retention score. Refer to “Materials and Methods” for full conditions and retention calculations.

Single base transversion effects on *rol-6* target

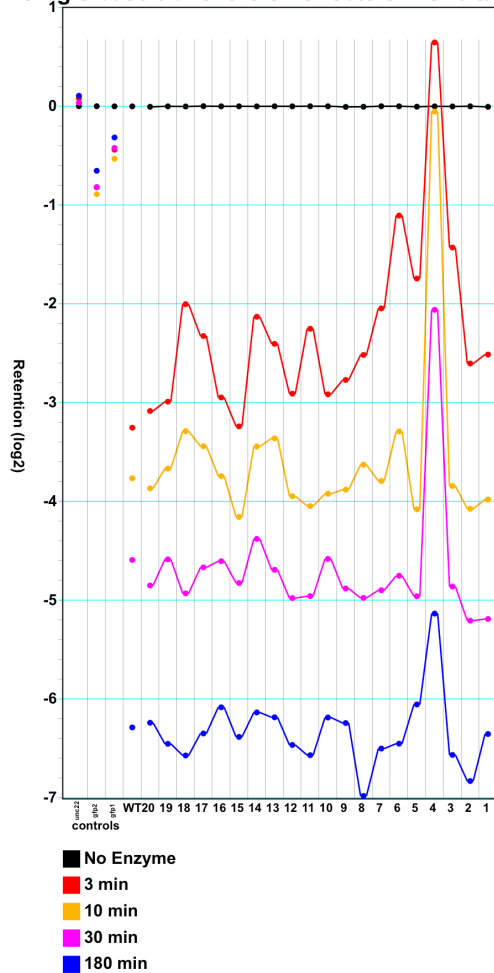

Supplementary Figure 41) Results from Cas9 interaction with pooled *rol-6* targets. All reactions were done with thermobuffer and conditions detailed in “Materials and Methods: High throughput in vitro target specificity assays”. Bar graphs of median retention scores for double consecutive variants. Error bars represent the standard deviation of the retentions for distinct sequence tags in the library matching the noted target sequence, with (n) values below each bar representing the total number of independent barcoded tags assessed for each target sequence. Refer to “Materials and Methods” for full conditions and retention calculations.

*rol-6* Target sequences

1. GTGACTCGTCAACAATATGGAGG
2. GTGAGAGCTCAACAATATGGAGG
3. GTGAGACGAGAACAATATGGAGG
4. GTGAGACGCTTCAATATGGAGG
5. GTGAGACGTCAAGTATATGGAGG
6. GTGAGACGTCAACAATAATGGAGG
7. GTGAGACGTCAACAATAGGAGG
8. GTGAGACGTCAACAATATCCAGG

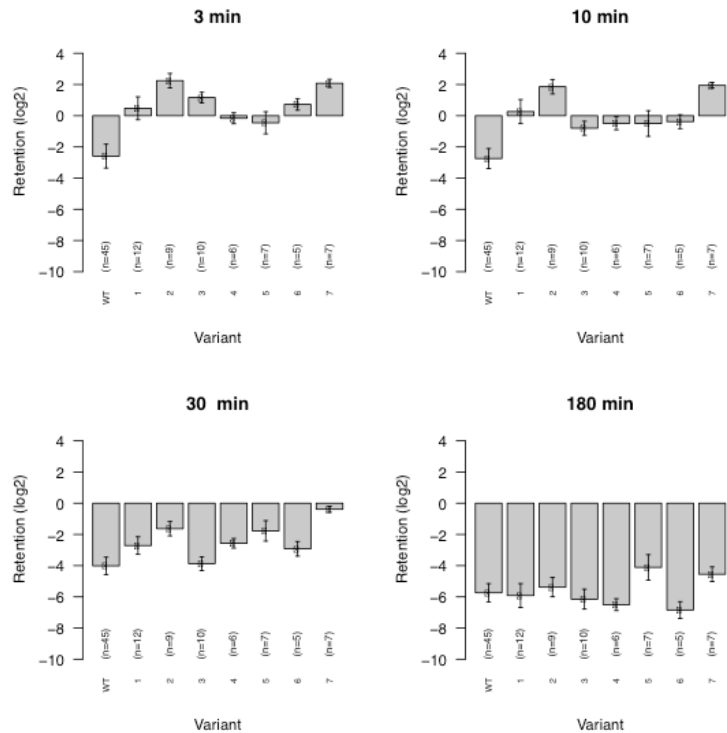

Supplementary Figure 42) Results from Cas9 interaction with pooled *rol-6* targets. All reactions were done with thermobuffer and conditions detailed in “Materials and Methods: High throughput in vitro target specificity assays”. Bar graphs of median retention scores for double consecutive variants. Error bars represent the standard deviation of the retentions for distinct sequence tags in the library matching the noted target sequence, with (n) values below each bar representing the total number of independent barcoded tags assessed for each target sequence. Refer to “Materials and Methods” for full conditions and retention calculations.

*rol-6* Target sequences

1. TGAGACGTCACAATATGGAGG
2. G GAGACGTCACAATATGGAGG
3. GT AGACGTCACAATATGGAGG
4. GTG GACGTCACAATATGGAGG
5. GTGA ACGTCACAATATGGAGG
6. GTGAG CGTCACAATATGGAGG
7. GTGAGA GTACAATATGGAGG
8. GTGAGAC TACAATATGGAGG
9. GTGAGACG CAACAATATGGAGG
10. GTGAGACGT AACAATATGGAGG
11. GTGAGACGTC ACAATATGGAGG
12. GTGAGACGTC AAATATGGAGG
13. GTGAGACGTC AACATATGGAGG
14. GTGAGACGTC AACAAATGGAGG
15. GTGAGACGTC AACAATGGAGG
16. GTGAGACGTC AACAATA GGAGG
17. GTGAGACGTC AACAATAT GGAGG

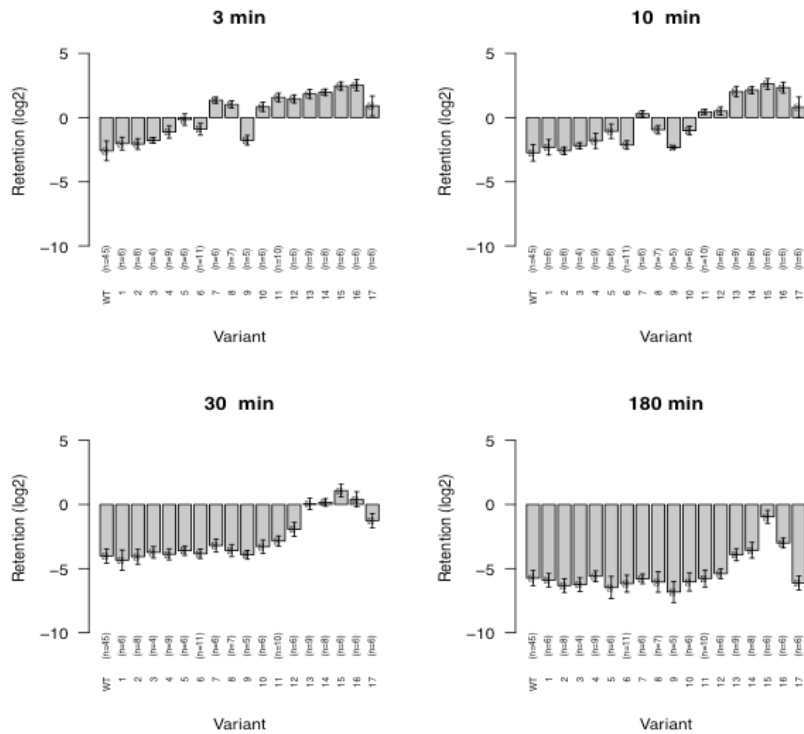

Supplementary Figure 43) Results from Cas9 interaction with pooled *unc-22A* targets. All reactions were done with thermobuffer and conditions detailed in “Materials and Methods: High throughput in vitro target specificity assays”. Cas9 high throughput nicking assay with Type II libraries for *unc-22A* (Method 2-Circular Library; AF\_SOL\_854). Retention scores are shown for whole-library assays with backbone cleavage step used to avoid preferential recovery of nicked substrates for *unc-22A* target single base transversions. X axis shows the positions, controls, and wild type retention (WT—full target match), negative controls (no target match) and individual transversions through the full sequence. Y axis shows the retention score. Refer to “Materials and Methods” for full conditions and retention calculations.

Single base transversion effects on *unc-22A* target

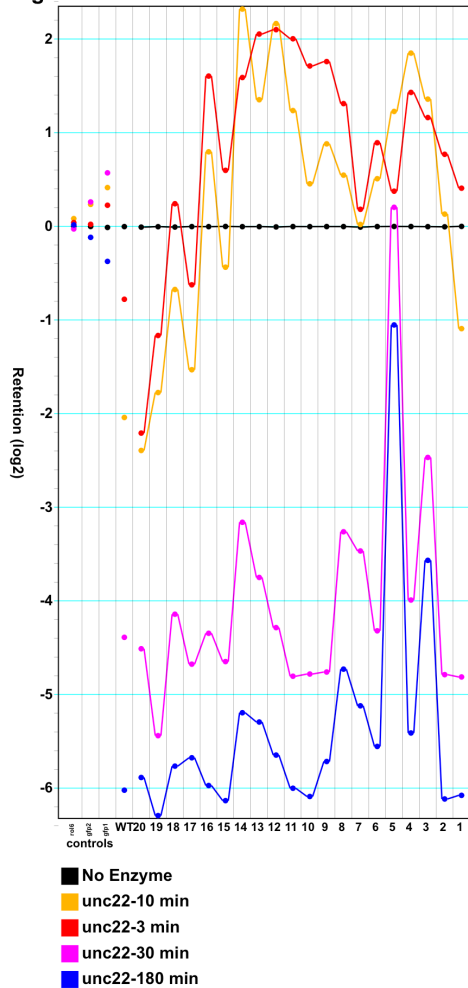

Supplementary Figure 44) Results from Cas9 interaction with pooled *unc-22A* targets. All reactions were done with thermobuffer and conditions detailed in “Materials and Methods: High throughput in vitro target specificity assays”. Cas9 high throughput nicking assay with Type II libraries for *unc-22A* (Method 2-Circular Library; AF\_SOL\_854). Bar graphs of median retention scores for double consecutive variants. Error bars represent the standard deviation of the retentions for distinct sequence tags in the library matching the noted target sequence, with (n) values below each bar representing the total number of independent barcoded tags assessed for each target sequence. Refer to “Materials and Methods” for full conditions and retention calculations.

unc-22A Target Sequences

1. CGACCACCGTCGCCGGCATTGG
2. GCTGCACCGTCGCCGGCATTGG
3. GCACGTCGTCGCCGGCATTGG
4. GCACCAGGGTCGCCGGCATTGG
5. GCACCACCACGCCGGCATTGG
6. GCACCACCGTGC CGGCATTGG
7. GCACCACCGTCG GGGCATTGG
8. GCACCACCGTCGCC CCGCATTGG
9. GCACCACCGTCGCCGG GTTTGG
10. GCACCACCGTCGCCGGCA AATGG

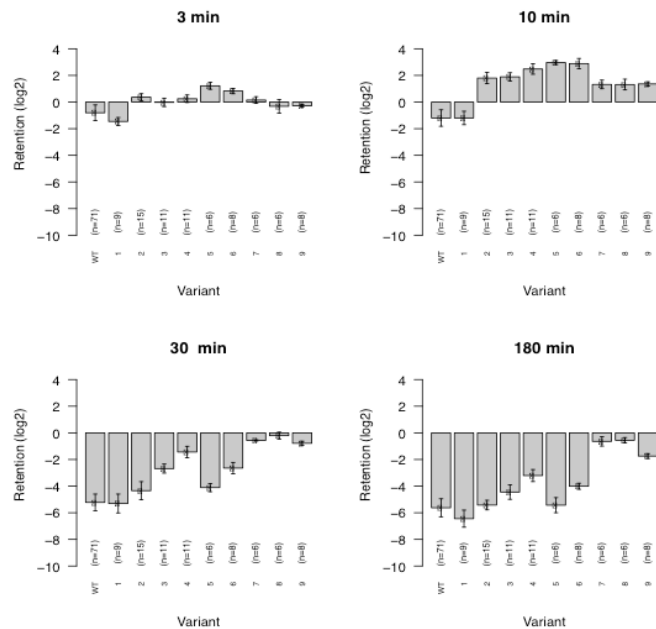

Supplementary Figure 45) Results from Cas9 interaction with pooled *unc-22A* targets. All reactions were done with thermobuffer and conditions detailed in “Materials and Methods: High throughput in vitro target specificity assays”. Cas9 high throughput nicking assay with Type II libraries for *unc-22A* (Method 2-Circular Library; AF\_SOL\_854). Bar graphs of median retention scores for single deletion variants. Error bars represent the standard deviation of the retentions for distinct sequence tags in the library matching the noted target sequence, with (n) values below each bar representing the total number of independent barcoded tags assessed for each target sequence. Refer to “Materials and Methods” for full conditions and retention calculations.

*unc-22A* Target Sequences

1. \_CACCACCGTCGCCGGCATTGG
2. G\_ACCACCGTCGCCGGCATTGG
3. GC\_CCACCGTCGCCGGCATTGG
4. GCA\_CACCGTCGCCGGCATTGG
5. GCACC\_CCGTCGCCGGCATTGG
6. GCACCA\_CGTCGCCGGCATTGG
7. GCACCACC\_TCGCCGGCATTGG
8. GCACCACCG\_CGCGGCATTGG
9. GCACCACCGTG\_CCGGCATTGG
10. GCACCACCGTCCC\_GGCATTGG
11. GCACCACCGTCGGG\_CATTGG
12. GCACCACCGTCGCCG\_ATTTGG
13. GCACCACCGTCGCCG\_ATTTGG
14. GCACCACCGTCGCCGGC\_TTTGG
15. GCACCACCGTCGCCGGCATT\_GG

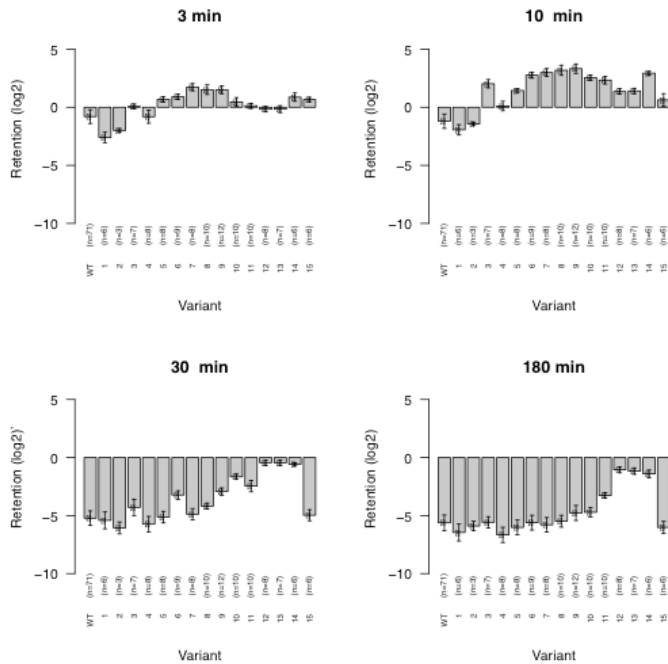

Supplementary Figure 46) Schematic of Type I library redrawn from Fu et al. (2016). Type I libraries were created using oligo pooled array synthesis. Type II libraries were made using degenerate oligo synthesis.

Target library Type I:

NNNNNNGCACCGTCGCCGGCATTGGNNNNNN

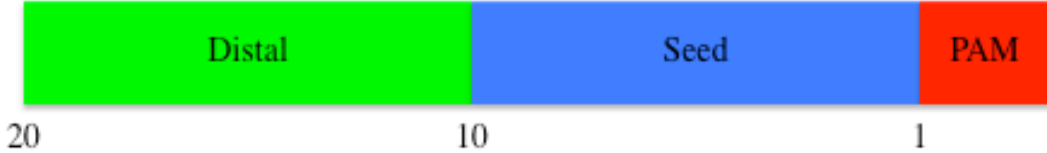

Supplementary Figure 47) Double mutant retention ( $\log_2$ ) score profile with Cas9 and variant *unc-22A* library generated via degenerate oligonucleotide synthesis. These are non-precleaved (Method 2) libraries, so that a positive retention ( $\log_2$ ) score indicates nicking of the indicated double mutant substrate at the indicated time point. White boxes indicate no mutant available. The single box labeled “NoMutant” at each time point indicates retention ( $\log_2$ ) score for the wild type *unc-22A* sequence. The diagonal indicates the retention ( $\log_2$ ) of the single mutant at that position. Refer to “Materials and Methods” for full conditions and retention ( $\log_2$ ) calculations. (Method 2-Circular Library; AF\_SOL\_827)

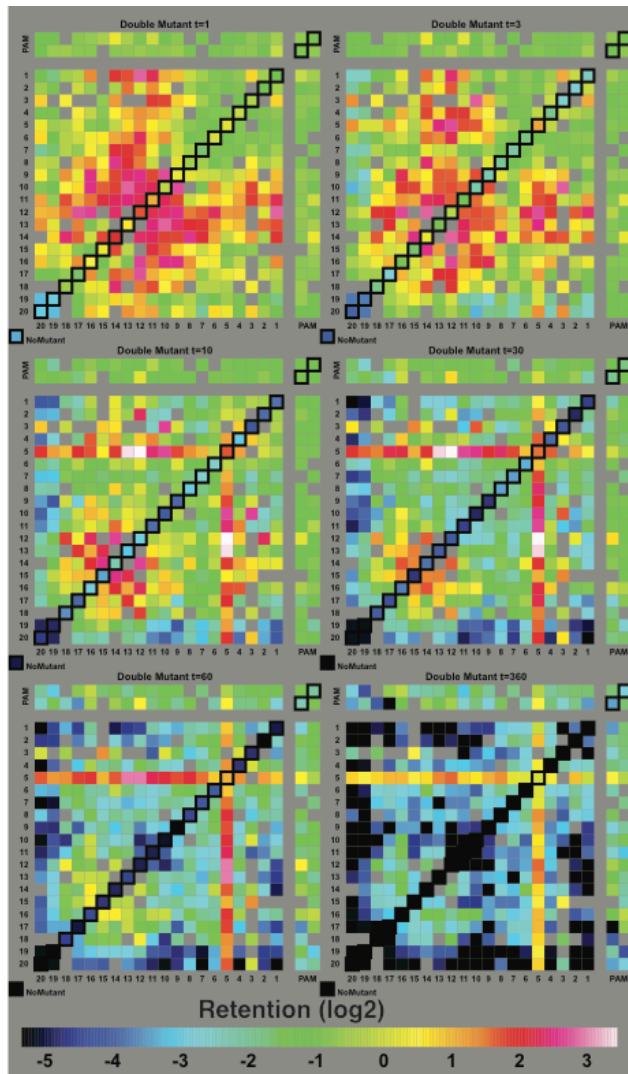



Supplementary Figure 48) Cas9 nicking assessments on individual circular plasmid targets, assessed using agarose gel electrophoresis in the presence of Ethidium Bromide intercalator. All experiments done with 79.5 ng of enzyme with 1:1 ratio of gRNA:protein with at least 100 ng of target plasmid DNA (supercoiled) in buffer detailed in “Materials and Methods” at 37°C. Ethidium bromide staining of DNA allows visualization of electrophoretic mobility, with a 1kb ladder (left on each gel) used to determine relative mobility of linearized fragments as a function of size. Inferred mobilities of nicked, linear, and supercoiled target plasmids are indicated with arrows at the right of each gel. Sequences shown are of the target-homologous region of each plasmid and of the corresponding guide homology segment. All nicking experiments were done at least twice with similar results. *unc-22a* target with mismatched *unc-22a* gRNA.

p753: GCACCACCGTCGCCGGCATTGG  
 Mis3: GC<sup>G</sup>CCACCGTCGCCG\_CATT

|                     |      |      |      |      |      |
|---------------------|------|------|------|------|------|
| <b>Time (mins):</b> | 10   | 30   | 60   | -    | 60   |
| <b>Guide:</b>       | Mis3 | Mis3 | Mis3 | -    | -    |
| <b>Cas9:</b>        | +    | +    | +    | -    | -    |
| <b>EcoRV:</b>       | -    | -    | -    | -    | +    |
| <b>Plasmid:</b>     | p753 | p753 | p753 | p753 | p753 |

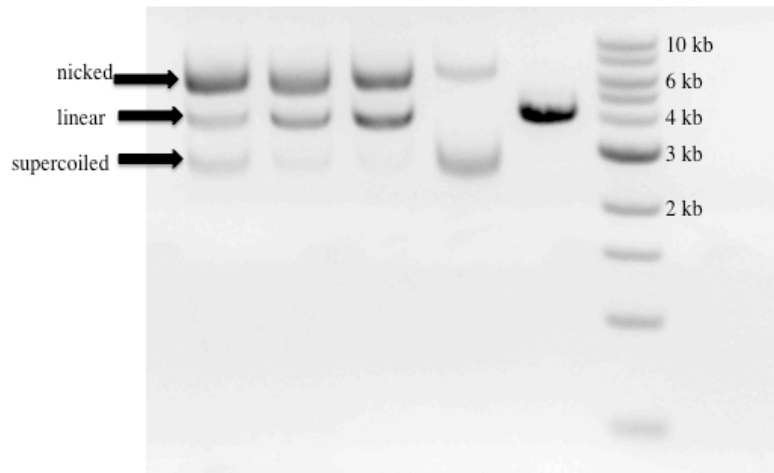

Supplementary Figure 49) Cas9 nicking assessments on individual circular plasmid targets, assessed using agarose gel electrophoresis in the presence of Ethidium Bromide intercalator. All experiments done with 79.5 ng of enzyme with 1:1 ratio of gRNA:protein with at least 100 ng of target plasmid DNA (supercoiled) in buffer detailed in “Materials and Methods” at 37°C. Ethidium bromide staining of DNA allows visualization of electrophoretic mobility, with a 1kb ladder (left on each gel) used to determine relative mobility of linearized fragments as a function of size. Inferred mobilities of nicked, linear, and supercoiled target plasmids are indicated with arrows at the right of each gel. Sequences shown are of the target-homologous region of each plasmid and of the corresponding guide homology segment. All nicking experiments were done at least twice with similar results. EGFP-2 target with mismatched EGFP-2 gRNAs

Mis 4: GATGCCGTTCTT TGCTTGT  
 Mis 5: GATGCG TCTTCTGCTTT  
 p793: GATGCCGTTCTTCTGCTTGTCGG

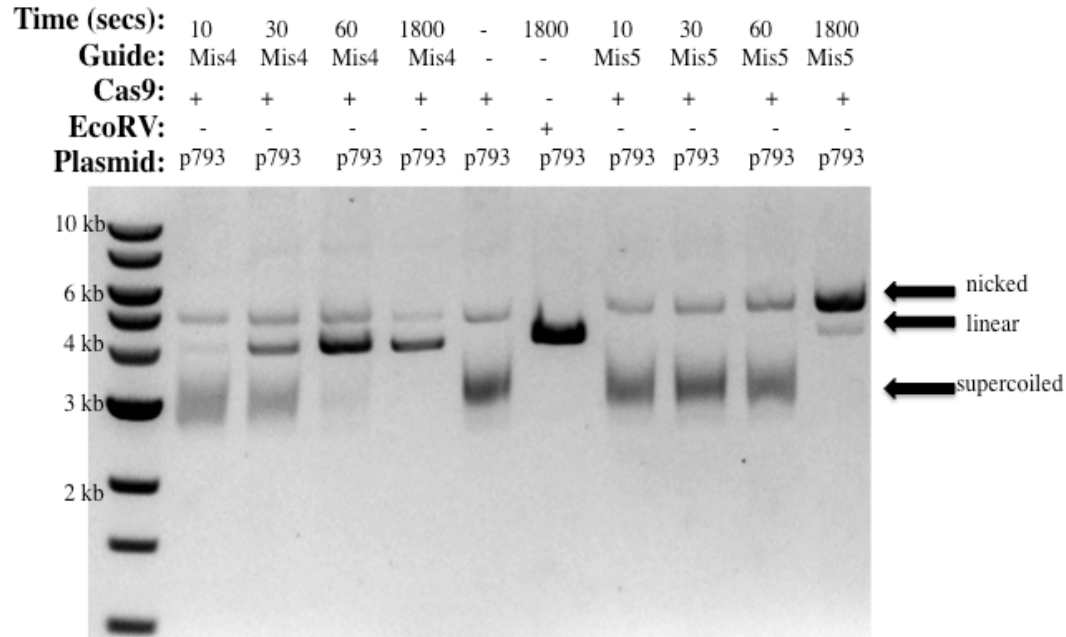

Supplementary Figure 50) Cas9 nicking assessments on individual circular plasmid targets, assessed using agarose gel electrophoresis in the presence of Ethidium Bromide intercalator. All experiments done with 79.5 ng of enzyme with 1:1 ratio of gRNA:protein with at least 100 ng of target plasmid DNA (supercoiled) in buffer detailed in “Materials and Methods” at 37°C. Ethidium bromide staining of DNA allows visualization of electrophoretic mobility, with a 1kb ladder (left on each gel) used to determine relative mobility of linearized fragments as a function of size. Inferred mobilities of nicked, linear, and supercoiled target plasmids are indicated with arrows at the right of each gel. Sequences shown are of the target-homologous region of each plasmid and of the corresponding guide homology segment. Variant *unc-22A* target with EGFP-2 gRNA.

```

      *           *
23 CCAAATGCCG-GCGACGGGGTGC 1
   #| | | | | #| #| #| #| #|
1  ~~~GATGCCGTCTTC-TGCTTGT 20
      *           *

```

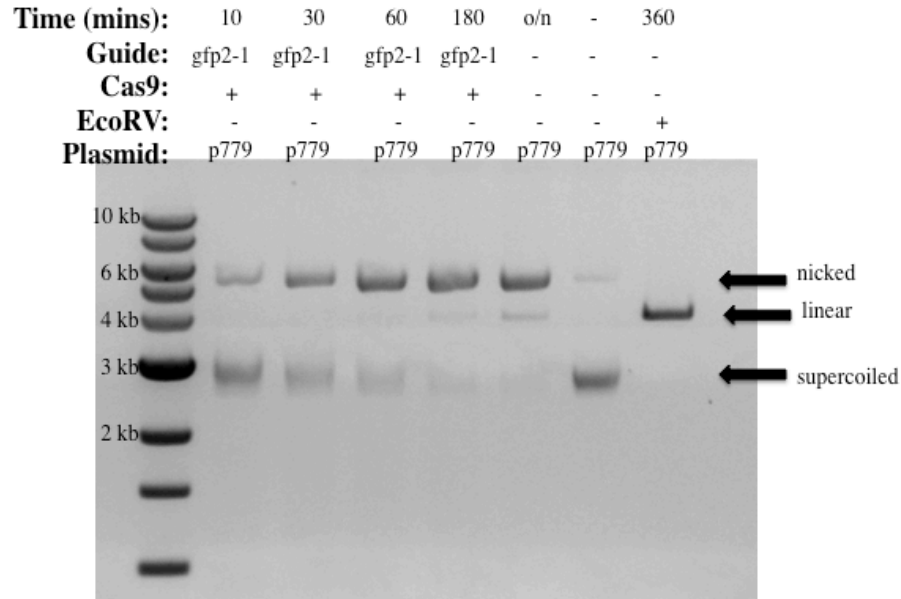

Supplementary Figure 51) Cas9 nicking assessments on individual circular plasmid targets, assessed using agarose gel electrophoresis in the presence of Ethidium Bromide intercalator. All experiments done with 79.5 ng of enzyme with 1:1 ratio of gRNA:protein with at least 100 ng of target plasmid DNA (supercoiled) in buffer detailed in “Materials and Methods” at 37°C. Ethidium bromide staining of DNA allows visualization of electrophoretic mobility, with a 1kb ladder (left on each gel) used to determine relative mobility of linearized fragments as a function of size. Inferred mobilities of nicked, linear, and supercoiled target plasmids are indicated with arrows at the right of each gel. Sequences shown are of the target-homologous region of each plasmid and of the corresponding guide homology segment. *rol-6* target with *unc-22a* gRNA.

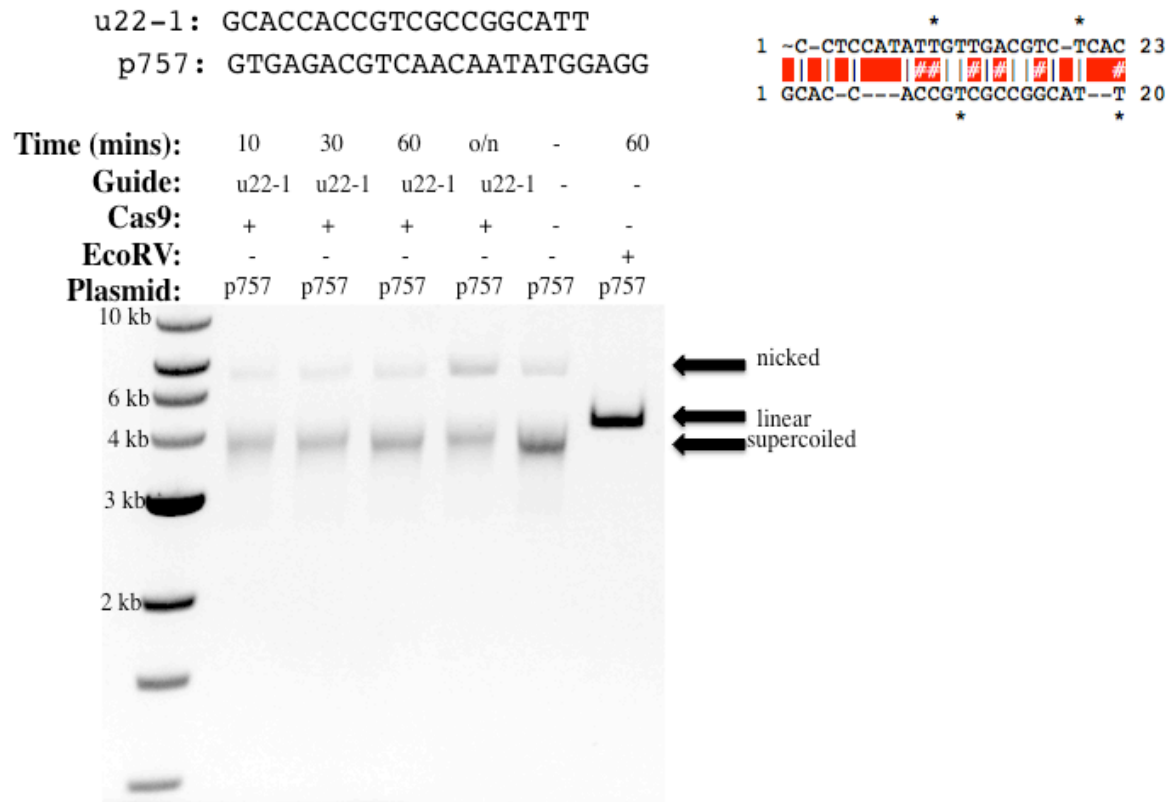

Supplementary Figure 52) Results from Cas9D10A interaction with pooled *unc-22A* targets. All reactions were done with thermobuffer and conditions detailed in “Materials and Methods: High throughput in vitro target specificity assays”. Cas9 high throughput nicking

assay with Type II libraries for *unc-22A*. Retention ( $\log_2$ ) scores are shown for whole-library assays with backbone cleavage step used to avoid preferential recovery of nicked substrates for *unc-22A* target single base transversions with Cas9D10A. X axis shows the positions, controls, and wild type retention ( $\log_2$ ) (WT—full target match), negative controls (no target match) and individual transversions through the full sequence. Y axis shows the retention ( $\log_2$ ) score. Refer to “Materials and Methods” for full conditions and retention ( $\log_2$ ) calculations. (Method 2-Circular Library; AF\_SOL\_855)

## Single base transversion effects on *unc-22A* target

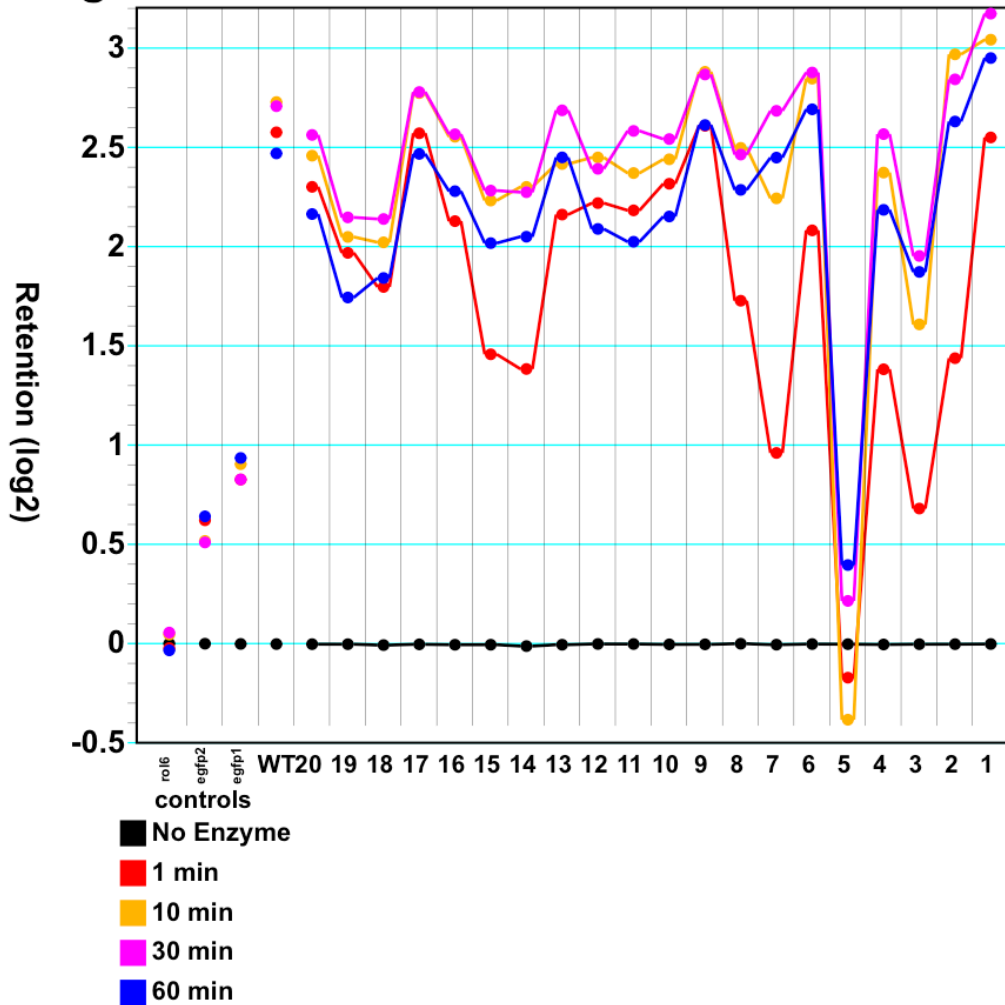

Supplementary Figure 53) Results from Cas9D10A interaction with pooled *unc-22A* targets. All reactions were done with thermobuffer and conditions detailed in “Materials and Methods: High throughput in vitro target specificity assays”. Cas9 high throughput nicking assay with Type II libraries for *unc-22A*. Cas9D10A specificity profile results for single double consecutive transversion variants. Bar graphs of median retention (log<sub>2</sub>) scores for double consecutive variants. Error bars represent the standard deviation of the retention (log<sub>2</sub>)s for distinct sequence tags in the library matching the noted target sequence, with (n) values below each bar representing the total number of independent barcoded tags assessed for each target sequence. Refer to “Materials and Methods” for full conditions and retention (log<sub>2</sub>) calculations.

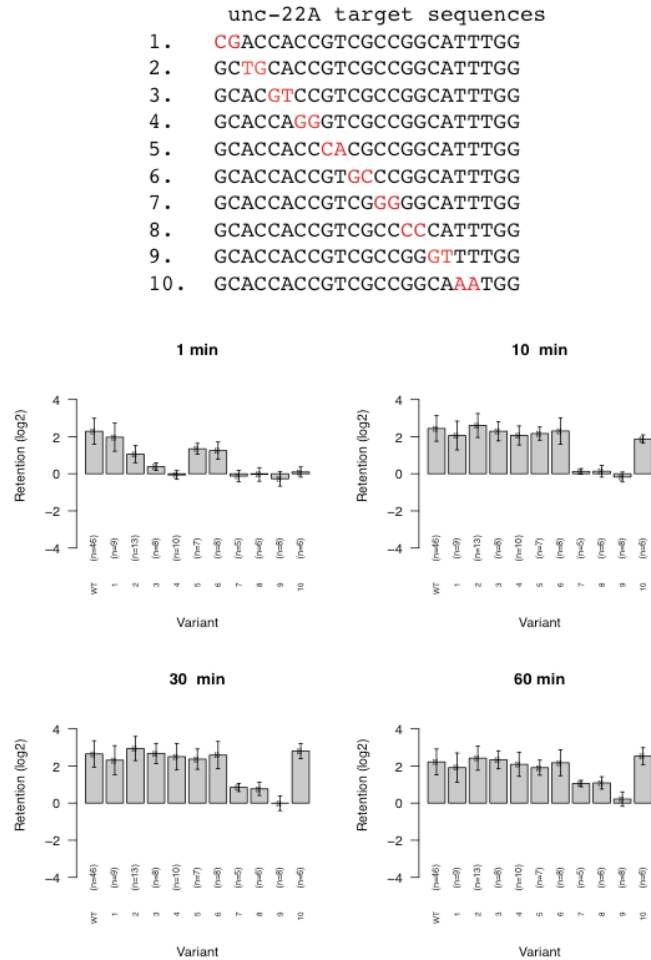

Supplementary Figure 54) Results from Cas9D10A interaction with pooled *unc-22A* targets. All reactions were done with thermobuffer and conditions detailed in “Materials and Methods: High throughput in vitro target specificity assays”. Cas9 high throughput nicking assay with Type II libraries for *unc-22A*. Cas9D10A specificity profile results for single deletion variants. Bar graphs of median retention (log<sub>2</sub>) scores for double consecutive variants. Error bars represent the standard deviation of the retention (log<sub>2</sub>)s for distinct sequence tags in the library matching the noted target sequence, with (n) values below each bar representing the total number of independent barcoded tags assessed for each target sequence. Refer to “Materials and Methods” for full conditions and retention (log<sub>2</sub>) calculations.

*unc-22A* Target Sequences

1. \_CACACCGTCGCCGCATTGG
2. G\_ACCACCGTCGCCGCATTGG
3. GC\_CCACCGTCGCCGCATTGG
4. GCA\_CACCGTCGCCGCATTGG
5. GCACC\_CCGTCGCCGCATTGG
6. GCACCA\_CGTCGCCGCATTGG
7. GCACCACC\_TGCGCCGCATTGG
8. GCACCACCG\_CGCGGCATTGG
9. GCACCACCGTG\_CCGGCATTGG
10. GCACCACCGTCC\_GGCATTGG
11. GCACCACCGTCGCCG\_CATTGG
12. GCACCACCGTCGCCG\_ATTTGG
13. GCACCACCGTCGCCG\_ATTTGG
14. GCACCACCGTCGCCGG\_TTTGG
15. GCACCACCGTCGCCGCATT\_GG

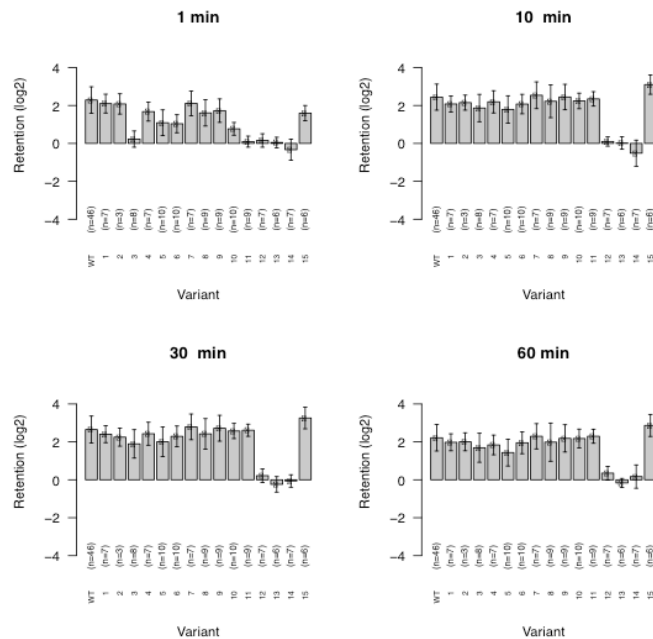

Supplement: NIHMS1519300-supplement-1.pdf [file NIHMS1519300-supplement-1.pdf]
